# Supplementary material for: The homogeneous gas-phase formation mechanisms of PCPTs/PCDTs/PCDFs from the radical/radical cross-condensation of 2-CPR and 2-CTPR: a theoretical, mechanistic and kinetics study
Source: Royal Society of Chemistry journal article supplement (doi:10.1039/d1ra00599e), 2021-01-01
Supplement: d1ra00599e1.pdf [file d1ra00599e1.pdf]

**Supplementary Information for**

**The Homogeneous Gas-phase Formation Mechanism of  
PCPT/DT/DFs from Radical/Radical Cross-Condensation  
of 2-CPR and 2-CTPR : A Theoretical Mechanistic and  
Kinetic Study**

Ying Li<sup>a</sup>, Yanan Han<sup>a</sup>, Zhuochao Teng<sup>a</sup>, Xianwei Zhao<sup>a</sup>, Yanhui Sun<sup>b</sup>, Fei Xu<sup>\*a</sup>,  
Qingzhu Zhang<sup>a</sup>, Wenxing Wang<sup>a</sup>

<sup>a</sup>Environment Research Institute, Shandong University, Qingdao 266237, P. R. China

<sup>b</sup>College of Environment and Safety Engineering, Qingdao University of Science &  
Technology, Qingdao 266042, P. R. China

Keywords

PCPT/DT/DFs, Chlorophenol, Chlorothiphenol, Reaction mechanism, Rate constants

---

\*Corresponding author. E-mail: xufei@sdu.edu.cn

Fax: 86-532-58631992

Contains two figures and five tables and ninety six pages:

**Figure S1.** PCTA/DT formation routes from self-coupling of 2-CTPR embedded with the potential barriers  $\Delta E$  (in kcal/mol) and reaction heats  $\Delta H$  (in kcal/mol).  $\Delta H$  is calculated at 0 K.

**Figure S2.** Fitted plots of the CVT/SCT rate constants in the temperature range of 600–1200 K for the rate-determining steps in each PCPT/DT/DF formation routes from cross-condensation of 2-CPR and 2-CTPR.

**Table S1.** The comparison of calculated and experimental structural parameters of phenoxathiin. Distances are in angstrom.

**Table S2.** Imaginary frequencies (in  $\text{cm}^{-1}$ ), zero point energies (ZPE, in a.u.) and total energies (in a.u.) for the transition states involved in the formation of PCPT/DF/DTs from cross-condensation of 2-CPR and 2-CTPR.

**Table S3.** CVT/SCT rate constants for the formation of PCPT/DT/DFs from cross-condensation of 2-CPR and 2-CTPR over the temperature range of 600–1200 K (units are  $\text{s}^{-1}$  and  $\text{cm}^3 \text{ molecule}^{-1} \text{ s}^{-1}$  for unimolecular and bimolecular reactions, respectively).

**Table S4.** Cartesian coordinates for the transition states involved in the formation of PCPT/DT/DFs from cross-condensation of 2-CPR and 2-CTPR.

**Table S5.** Cartesian coordinates for the reactants, intermediates and products involved in the formation of PCPT/DT/DFs from cross-condensation of 2-CPR and 2-CTPR.

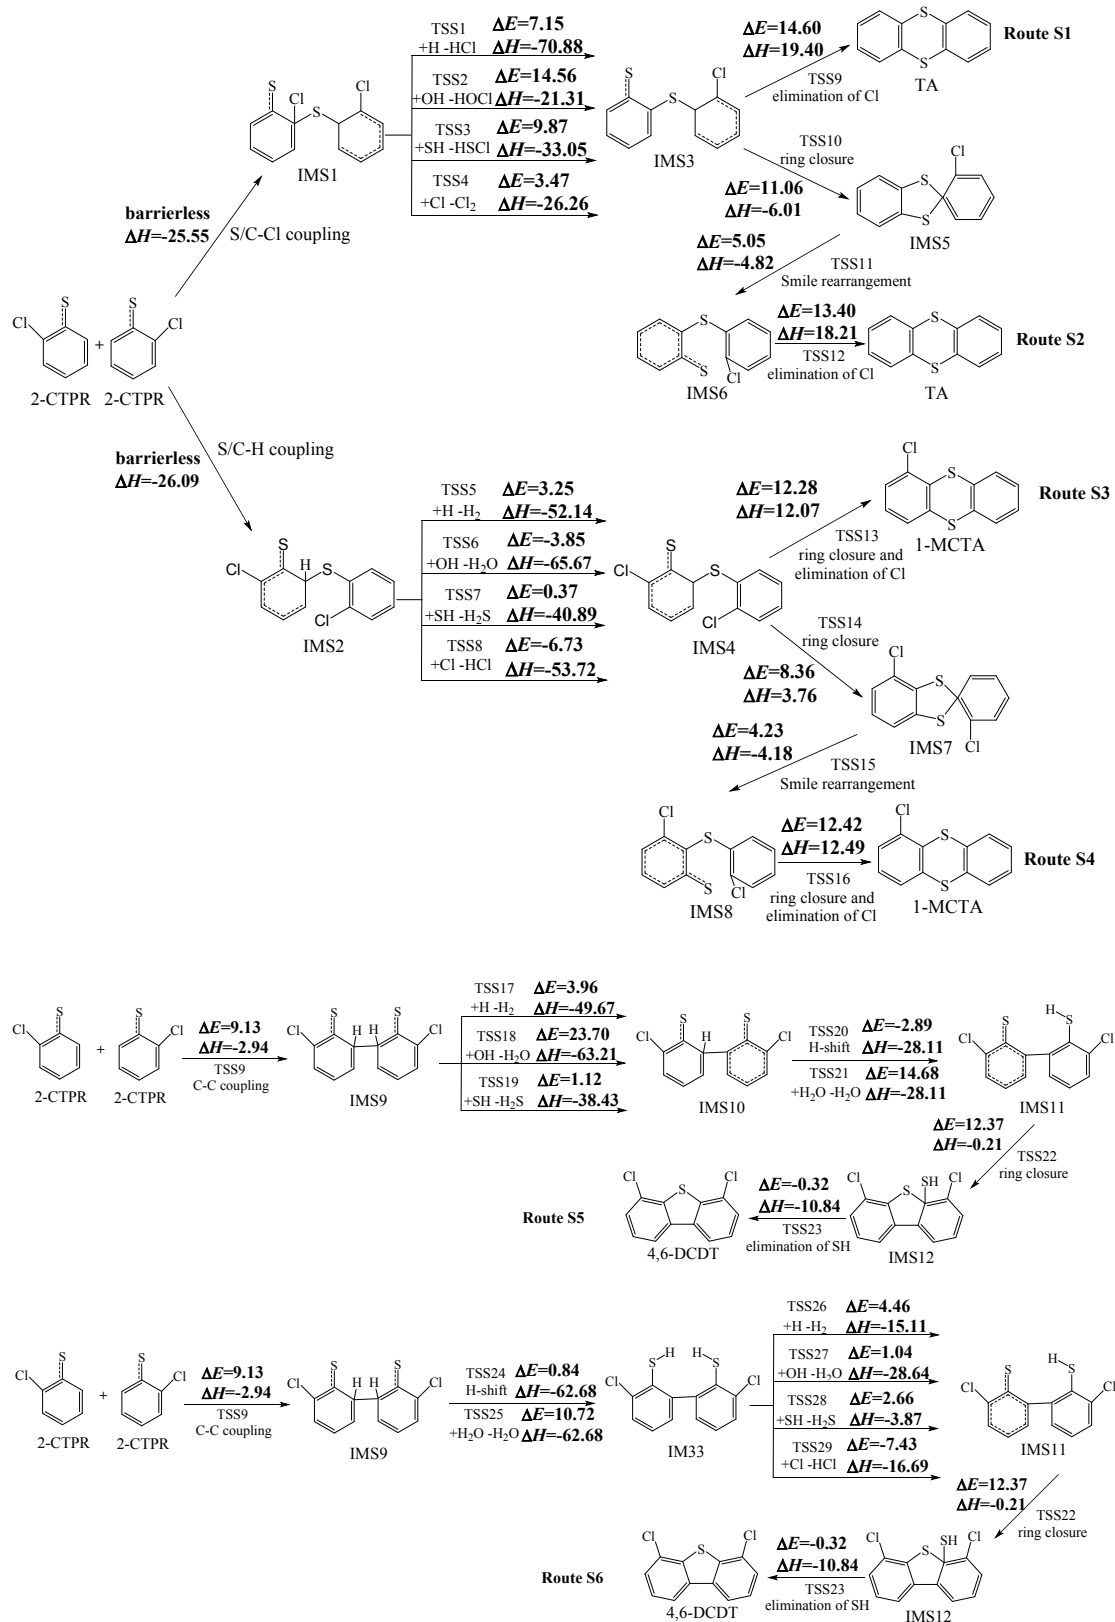

Figure S1.

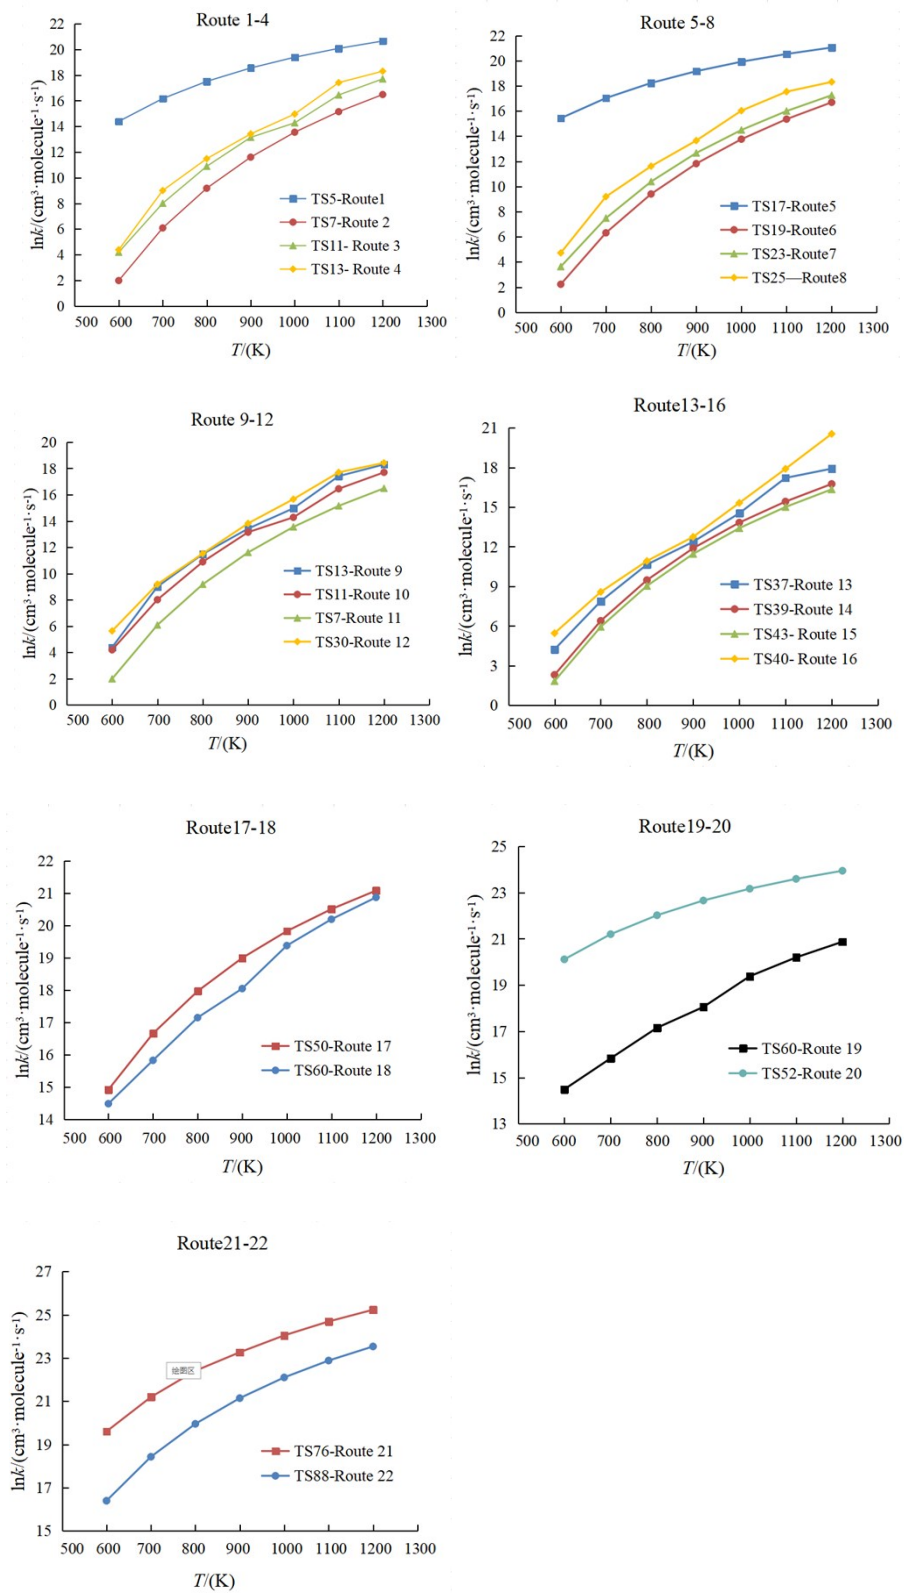

Figure S2.

**Table S1.** The comparison of calculated and experimental structural parameters of phenoxathiin. Distances are in angstrom.

| Parameter | X-ray    | MPWB1K | Discrepancy |
|-----------|----------|--------|-------------|
| C-O       | 1.387(3) | 1.359  | 2.1%        |
| C2-C3     | 1.384(4) | 1.384  | 0.1%        |
| C3-C4     | 1.381(4) | 1.381  | 0%          |
| C4-C5     | 1.388(5) | 1.384  | 0.3%        |
| C6-C7     | 1.396(4) | 1.388  | 0.6%        |
| C-S       | 1.762(3) | 1.754  | 0.5%        |
| C3-H      | 0.92(3)  | 1.078  | 16.8%       |
| C4-H      | 0.93(4)  | 1.078  | 15.5%       |
| O-C2-C3   | 117.2(3) | 115.2  | 1.7%        |
| C2-C3-C4  | 119.8(3) | 120.5  | 0.6%        |
| C3-C4-C5  | 120.3(3) | 119.8  | 0.4%        |
| C6-C7-S   | 119.5(3) | 117.7  | 1.6%        |
| C-S-C     | 97.7(1)  | 100.5  | 2.9%        |
| C-O-C     | 117.4(2) | 123.3  | 0.5%        |
| C2-C3-H   | 116(2)   | 117.9  | 1.5%        |
| C3-C4-H   | 118(2)   | 119.6  | 1.2%        |

**Table S2.** Imaginary frequencies (in  $\text{cm}^{-1}$ ), zero point energies (ZPE, in a.u.) and total energies (in a.u.) for the transition states involved in the formation of PCPT/DF/DTs from cross-condensation of 2-CPR and 2-CTPR.

| Transition States | Imaginary Frequencies | ZPE     | Total Energies |
|-------------------|-----------------------|---------|----------------|
| TS1               | -843i                 | 0.17264 | -1856.28898    |
| TS2               | -597i                 | 0.18210 | -1931.47943    |
| TS3               | -393i                 | 0.17886 | -2254.58840    |
| TS4               | -266i                 | 0.17088 | -2316.01258    |
| TS5               | -408i                 | 0.16951 | -1395.52143    |
| TS6               | -337i                 | 0.16994 | -1395.52980    |
| TS7               | -1047i                | 0.16259 | -1395.48306    |
| TS8               | -388i                 | 0.16908 | -1395.52651    |
| TS9               | -636i                 | 0.16781 | -1395.50322    |
| TS10              | -540i                 | 0.16843 | -1395.50695    |
| TS11              | -1001i                | 0.16252 | -1395.48646    |
| TS12              | -692i                 | 0.16766 | -1395.50538    |
| TS13              | -763i                 | 0.16788 | -1395.50077    |
| TS14              | -1571i                | 0.16964 | -1856.27977    |
| TS15              | -420i                 | 0.17615 | -2254.59880    |
| TS16              | -252i                 | 0.16995 | -2316.02451    |
| TS17              | -408i                 | 0.15985 | -1855.21218    |
| TS18              | -336i                 | 0.15996 | -1855.22033    |
| TS19              | -1041i                | 0.15280 | -1855.17340    |
| TS20              | -387i                 | 0.15913 | -1855.21775    |
| TS21              | -595i                 | 0.15801 | -1855.19525    |
| TS22              | -514i                 | 0.15843 | -1855.19767    |
| TS23              | -1000i                | 0.15272 | -1855.17674    |
| TS24              | -629i                 | 0.15784 | -1855.19757    |
| TS25              | -693i                 | 0.15803 | -1855.19205    |
| TS26              | -991i                 | 0.17218 | -1856.31051    |
| TS27              | -530i                 | 0.18192 | -1931.52058    |
| TS28              | -432i                 | 0.17875 | -2254.60512    |
| TS29              | -286i                 | 0.17058 | -2316.02884    |
| TS30              | -635i                 | 0.16781 | -1395.50322    |
| TS31              | -388i                 | 0.16909 | -1395.52651    |
| TS32              | -395i                 | 0.16901 | -1395.52576    |
| TS33              | -1254i                | 0.17004 | -1856.31850    |
| TS34              | -405i                 | 0.17953 | -1931.53349    |
| TS35              | -1009i                | 0.17424 | -2254.62208    |
| TS36              | -169i                 | 0.16952 | -2316.04997    |
| TS37              | -754i                 | 0.15800 | -1855.19067    |
| TS38              | -538i                 | 0.15876 | -1855.19725    |

Table S2. *Cont.*

| Transition States | Imaginary<br>Frequencies | ZPE     | Total Energies |
|-------------------|--------------------------|---------|----------------|
| TS39              | -1118i                   | 0.15278 | -1855.17182    |
| TS40              | -660i                    | 0.15798 | -1855.19589    |
| TS41              | -389i                    | 0.15941 | -1855.21580    |
| TS42              | -329i                    | 0.16011 | -1855.21842    |
| TS43              | -1047i                   | 0.15296 | -1855.17122    |
| TS44              | -380i                    | 0.15937 | -1855.21537    |
| TS45              | -387i                    | 0.15938 | -1855.20732    |
| TS46              | -452i                    | 0.17107 | -1855.76596    |
| TS47              | -893i                    | 0.17023 | -1856.28053    |
| TS48              | -307i                    | 0.18008 | -1931.46762    |
| TS49              | -337i                    | 0.17526 | -2254.58558    |
| TS50              | -1380i                   | 0.15519 | -1855.18822    |
| TS51              | -1124i                   | 0.18092 | -1931.58144    |
| TS52              | -527i                    | 0.15611 | -1855.19295    |
| TS53              | -380i                    | 0.15742 | -1855.22769    |
| TS54              | -1185i                   | 0.16967 | -1856.27855    |
| TS55              | -571i                    | 0.17941 | -1931.51191    |
| TS56              | -1365i                   | 0.17470 | -2254.58134    |
| TS57              | -1534i                   | 0.15570 | -1855.16156    |
| TS58              | -1440i                   | 0.18015 | -1931.57558    |
| TS59              | -398i                    | 0.15957 | -1855.22554    |
| TS60              | -555i                    | 0.15758 | -1855.21168    |
| TS61              | -1513i                   | 0.16596 | -1855.77091    |
| TS62              | -737i                    | 0.19285 | -1932.16333    |
| TS63              | -1228i                   | 0.19274 | -1932.17595    |
| TS64              | -950i                    | 0.17006 | -1856.36690    |
| TS65              | -1016i                   | 0.17469 | -2254.67218    |
| TS66              | -924i                    | 0.16849 | -2316.09746    |
| TS67              | -2212i                   | 0.16730 | -1856.35490    |
| TS68              | -1769i                   | 0.17707 | -1931.59292    |
| TS69              | -2038i                   | 0.17213 | -2254.65566    |
| TS70              | -925i                    | 0.16663 | -2316.09065    |
| TS71              | -172i                    | 0.17045 | -1855.75589    |
| TS72              | -817i                    | 0.17234 | -1856.26943    |
| TS73              | -635i                    | 0.18305 | -1931.48411    |
| TS74              | -511i                    | 0.17915 | -2254.06268    |
| TS75              | -419i                    | 0.17075 | -2315.98745    |
| TS76              | -2211i                   | 0.16359 | -1395.50419    |
| TS77              | -972i                    | 0.19074 | -1471.89514    |

**Table S2. Cont.**

| Transition States | Imaginary<br>Frequencies | ZPE     | Total Energies |
|-------------------|--------------------------|---------|----------------|
| TS78              | -525i                    | 0.16615 | -1395.50497    |
| TS79              | -281i                    | 0.16671 | -1395.53582    |
| TS80              | -296i                    | 0.17045 | -1855.76103    |
| TS81              | -932i                    | 0.17267 | -1856.26815    |
| TS82              | -652i                    | 0.18290 | -1931.47759    |
| TS83              | -526i                    | 0.17939 | -2254.56271    |
| TS84              | -440i                    | 0.17081 | -2315.98340    |
| TS85              | -1897i                   | 0.16487 | -1395.48351    |
| TS86              | -1413i                   | 0.18979 | -1471.88517    |
| TS87              | -380i                    | 0.16929 | -1395.53466    |
| TS88              | -558i                    | 0.16741 | -1395.51991    |



**Table S3.** CVT/SCT rate constants for the formation of PCPT/DT/DFs from cross-condensation of 2-CPR and 2-CTPR over the temperature range of 600–1200 K (units are  $s^{-1}$  and  $cm^3 \text{ molecule}^{-1} s^{-1}$  for unimolecular and bimolecular reactions, respectively).

| T(K) | CVT/SCT Rate Constants |                        |                    |                       |
|------|------------------------|------------------------|--------------------|-----------------------|
|      | TS1                    | TS3                    | TS5                | TS6                   |
| 600  | $6.04 \times 10^{-14}$ | $7.71 \times 10^{-14}$ | $1.77 \times 10^6$ | $2.45 \times 10^8$    |
| 700  | $1.12 \times 10^{-13}$ | $1.76 \times 10^{-13}$ | $1.05 \times 10^7$ | $7.62 \times 10^8$    |
| 800  | $1.85 \times 10^{-13}$ | $3.43 \times 10^{-13}$ | $4.01 \times 10^7$ | $1.79 \times 10^9$    |
| 900  | $2.78 \times 10^{-13}$ | $5.96 \times 10^{-13}$ | $1.14 \times 10^8$ | $3.47 \times 10^9$    |
| 1000 | $3.94 \times 10^{-13}$ | $9.52 \times 10^{-13}$ | $2.64 \times 10^8$ | $5.91 \times 10^9$    |
| 1100 | $5.31 \times 10^{-13}$ | $8.07 \times 10^{-13}$ | $5.25 \times 10^8$ | $9.15 \times 10^9$    |
| 1200 | $6.90 \times 10^{-13}$ | $1.16 \times 10^{-12}$ | $9.31 \times 10^8$ | $1.24 \times 10^{10}$ |
|      | TS7                    | TS8                    | TS9                | TS10                  |
| 600  | $7.23 \times 10^0$     | $2.74 \times 10^7$     | $2.63 \times 10^3$ | $2.07 \times 10^0$    |
| 700  | $4.37 \times 10^2$     | $1.15 \times 10^8$     | $6.19 \times 10^4$ | $7.19 \times 10^1$    |
| 800  | $9.65 \times 10^3$     | $3.40 \times 10^8$     | $6.67 \times 10^5$ | $1.03 \times 10^3$    |
| 900  | $1.09 \times 10^5$     | $7.93 \times 10^8$     | $1.28 \times 10^7$ | $8.16 \times 10^3$    |
| 1000 | $7.62 \times 10^5$     | $1.57 \times 10^8$     | $5.54 \times 10^7$ | $4.28 \times 10^4$    |
| 1100 | $3.78 \times 10^6$     | $2.74 \times 10^9$     | $1.84 \times 10^8$ | $1.66 \times 10^5$    |
| 1200 | $1.44 \times 10^7$     | $4.36 \times 10^9$     | $4.99 \times 10^8$ | $1.72 \times 10^6$    |
|      | TS11                   | TS12                   | TS13               | TS14                  |
| 600  | $6.58 \times 10^1$     | $1.61 \times 10^7$     | $7.96 \times 10^1$ | $1.46 \times 10^{-8}$ |
| 700  | $2.99 \times 10^3$     | $1.21 \times 10^8$     | $8.07 \times 10^3$ | $1.99 \times 10^{-8}$ |
| 800  | $5.34 \times 10^4$     | $5.49 \times 10^8$     | $9.66 \times 10^4$ | $2.66 \times 10^{-8}$ |
| 900  | $5.10 \times 10^5$     | $1.79 \times 10^9$     | $6.68 \times 10^5$ | $3.45 \times 10^{-8}$ |
| 1000 | $1.58 \times 10^6$     | $4.62 \times 10^9$     | $3.14 \times 10^6$ | $4.33 \times 10^{-8}$ |
| 1100 | $1.39 \times 10^7$     | $1.00 \times 10^{10}$  | $3.64 \times 10^7$ | $5.29 \times 10^{-8}$ |
| 1200 | $4.86 \times 10^7$     | $1.92 \times 10^{10}$  | $8.86 \times 10^7$ | $6.32 \times 10^{-8}$ |
|      | TS17                   | TS18                   | TS19               | TS20                  |
| 600  | $5.00 \times 10^6$     | $8.92 \times 10^8$     | $9.23 \times 10^0$ | $3.76 \times 10^8$    |
| 700  | $2.48 \times 10^7$     | $2.40 \times 10^9$     | $5.52 \times 10^2$ | $1.27 \times 10^9$    |
| 800  | $8.24 \times 10^7$     | $5.04 \times 10^9$     | $1.21 \times 10^4$ | $3.20 \times 10^9$    |
| 900  | $2.10 \times 10^8$     | $9.01 \times 10^9$     | $1.35 \times 10^5$ | $6.59 \times 10^9$    |
| 1000 | $4.46 \times 10^8$     | $1.24 \times 10^{10}$  | $9.43 \times 10^5$ | $1.27 \times 10^{10}$ |
| 1100 | $8.25 \times 10^8$     | $1.82 \times 10^{10}$  | $4.65 \times 10^6$ | $1.89 \times 10^{10}$ |
| 1200 | $1.38 \times 10^9$     | $2.49 \times 10^{10}$  | $1.77 \times 10^7$ | $2.81 \times 10^{10}$ |

**Table S3. Cont.**

| T(K) | CVT/SCT Rate Constants |                        |                        |                        |
|------|------------------------|------------------------|------------------------|------------------------|
|      | TS21                   | TS22                   | TS23                   | TS24                   |
| 600  | $2.32 \times 10^4$     | $2.43 \times 10^3$     | $3.76 \times 10^1$     | $4.98 \times 10^7$     |
| 700  | $4.64 \times 10^5$     | $3.41 \times 10^4$     | $1.77 \times 10^3$     | $3.64 \times 10^8$     |
| 800  | $4.39 \times 10^6$     | $2.47 \times 10^5$     | $3.24 \times 10^4$     | $1.62 \times 10^9$     |
| 900  | $2.55 \times 10^7$     | $1.15 \times 10^6$     | $3.15 \times 10^5$     | $5.20 \times 10^9$     |
| 1000 | $1.05 \times 10^8$     | $3.94 \times 10^6$     | $1.96 \times 10^6$     | $1.31 \times 10^{10}$  |
| 1100 | $3.36 \times 10^8$     | $1.08 \times 10^7$     | $8.83 \times 10^6$     | $2.80 \times 10^{10}$  |
| 1200 | $8.83 \times 10^8$     | $2.49 \times 10^7$     | $3.11 \times 10^7$     | $5.26 \times 10^{10}$  |
|      | TS25                   | TS26                   | TS27                   | TS28                   |
| 600  | $1.12 \times 10^2$     | $6.85 \times 10^{-14}$ | $6.93 \times 10^{-18}$ | $3.08 \times 10^{-16}$ |
| 700  | $9.78 \times 10^3$     | $1.83 \times 10^{-13}$ | $5.12 \times 10^{-17}$ | $1.31 \times 10^{-15}$ |
| 800  | $1.10 \times 10^5$     | $3.94 \times 10^{-13}$ | $2.40 \times 10^{-16}$ | $4.03 \times 10^{-15}$ |
| 900  | $8.42 \times 10^5$     | $7.35 \times 10^{-13}$ | $8.22 \times 10^{-16}$ | $1.00 \times 10^{-14}$ |
| 1000 | $9.09 \times 10^6$     | $1.23 \times 10^{-12}$ | $2.26 \times 10^{-15}$ | $2.14 \times 10^{-14}$ |
| 1100 | $4.12 \times 10^7$     | $1.91 \times 10^{-12}$ | $5.30 \times 10^{-15}$ | $4.07 \times 10^{-14}$ |
| 1200 | $8.96 \times 10^7$     | $2.78 \times 10^{-12}$ | $1.10 \times 10^{-14}$ | $7.09 \times 10^{-14}$ |
|      | TS29                   | TS30                   | TS31                   | TS32                   |
| 600  | $6.98 \times 10^{-13}$ | $2.77 \times 10^2$     | $2.19 \times 10^9$     | $3.20 \times 10^{11}$  |
| 700  | $1.43 \times 10^{-12}$ | $9.76 \times 10^3$     | $4.99 \times 10^9$     | $5.07 \times 10^{11}$  |
| 800  | $2.53 \times 10^{-12}$ | $1.00 \times 10^5$     | $9.09 \times 10^9$     | $7.16 \times 10^{11}$  |
| 900  | $4.01 \times 10^{-12}$ | $9.98 \times 10^5$     | $1.43 \times 10^{10}$  | $9.37 \times 10^{11}$  |
| 1000 | $5.90 \times 10^{-12}$ | $6.30 \times 10^6$     | $2.02 \times 10^{10}$  | $1.16 \times 10^{12}$  |
| 1100 | $8.14 \times 10^{-12}$ | $4.85 \times 10^7$     | $2.67 \times 10^{10}$  | $1.38 \times 10^{12}$  |
| 1200 | $1.10 \times 10^{-11}$ | $1.00 \times 10^8$     | $3.34 \times 10^{10}$  | $1.60 \times 10^{12}$  |
|      | TS33                   | TS34                   | TS37                   | TS38                   |
| 600  | $1.10 \times 10^{-12}$ | $5.68 \times 10^{-16}$ | $6.90 \times 10^1$     | $8.89 \times 10^0$     |
| 700  | $1.35 \times 10^{-12}$ | $7.93 \times 10^{-16}$ | $2.62 \times 10^3$     | $3.34 \times 10^2$     |
| 800  | $1.87 \times 10^{-12}$ | $1.08 \times 10^{-15}$ | $4.23 \times 10^4$     | $7.59 \times 10^3$     |
| 900  | $2.49 \times 10^{-12}$ | $1.45 \times 10^{-15}$ | $2.36 \times 10^5$     | $6.83 \times 10^4$     |
| 1000 | $3.20 \times 10^{-12}$ | $1.91 \times 10^{-15}$ | $2.05 \times 10^6$     | $3.50 \times 10^5$     |
| 1100 | $4.01 \times 10^{-12}$ | $2.47 \times 10^{-15}$ | $2.97 \times 10^7$     | $1.40 \times 10^6$     |
| 1200 | $4.92 \times 10^{-12}$ | $3.14 \times 10^{-15}$ | $5.98 \times 10^7$     | $4.47 \times 10^6$     |

**Table S3. Cont.**

| T(K) | CVT/SCT Rate Constants |                        |                        |                        |
|------|------------------------|------------------------|------------------------|------------------------|
|      | TS39                   | TS40                   | TS41                   | TS42                   |
| 600  | $1.00 \times 10^1$     | $2.34 \times 10^2$     | $6.20 \times 10^{11}$  | $4.06 \times 10^8$     |
| 700  | $5.96 \times 10^2$     | $5.30 \times 10^3$     | $9.31 \times 10^{11}$  | $1.21 \times 10^9$     |
| 800  | $1.30 \times 10^4$     | $5.52 \times 10^4$     | $1.26 \times 10^{12}$  | $2.77 \times 10^9$     |
| 900  | $1.45 \times 10^5$     | $3.43 \times 10^5$     | $1.60 \times 10^{12}$  | $4.61 \times 10^9$     |
| 1000 | $1.01 \times 10^6$     | $4.48 \times 10^6$     | $1.93 \times 10^{12}$  | $7.69 \times 10^9$     |
| 1100 | $4.96 \times 10^6$     | $5.90 \times 10^7$     | $2.25 \times 10^{12}$  | $1.17 \times 10^{10}$  |
| 1200 | $1.88 \times 10^7$     | $8.33 \times 10^8$     | $2.56 \times 10^{12}$  | $1.66 \times 10^{10}$  |
|      | TS43                   | TS44                   | TS45                   | TS47                   |
| 600  | $6.26 \times 10^0$     | $4.21 \times 10^{11}$  | $5.46 \times 10^5$     | $1.88 \times 10^{-14}$ |
| 700  | $3.79 \times 10^2$     | $6.51 \times 10^{11}$  | $3.32 \times 10^6$     | $3.42 \times 10^{-14}$ |
| 800  | $8.39 \times 10^3$     | $9.03 \times 10^{11}$  | $1.29 \times 10^7$     | $5.54 \times 10^{-14}$ |
| 900  | $9.45 \times 10^4$     | $1.16 \times 10^{12}$  | $3.72 \times 10^7$     | $8.28 \times 10^{-14}$ |
| 1000 | $6.63 \times 10^5$     | $1.43 \times 10^{12}$  | $8.72 \times 10^7$     | $1.17 \times 10^{-13}$ |
| 1100 | $3.29 \times 10^6$     | $1.68 \times 10^{12}$  | $1.75 \times 10^8$     | $1.58 \times 10^{-13}$ |
| 1200 | $1.25 \times 10^7$     | $1.93 \times 10^{12}$  | $3.14 \times 10^8$     | $2.05 \times 10^{-13}$ |
|      | TS48                   | TS49                   | TS50                   | TS52                   |
| 600  | $1.10 \times 10^{-23}$ | $3.90 \times 10^{-18}$ | $3.03 \times 10^6$     | $5.42 \times 10^8$     |
| 700  | $2.76 \times 10^{-22}$ | $5.85 \times 10^{-18}$ | $1.72 \times 10^7$     | $1.61 \times 10^9$     |
| 800  | $3.24 \times 10^{-21}$ | $8.39 \times 10^{-18}$ | $6.37 \times 10^7$     | $3.65 \times 10^9$     |
| 900  | $2.28 \times 10^{-20}$ | $1.16 \times 10^{-17}$ | $1.78 \times 10^8$     | $6.91 \times 10^9$     |
| 1000 | $1.11 \times 10^{-19}$ | $1.56 \times 10^{-17}$ | $4.08 \times 10^8$     | $1.15 \times 10^{10}$  |
| 1100 | $4.19 \times 10^{-19}$ | $2.05 \times 10^{-17}$ | $8.07 \times 10^8$     | $1.76 \times 10^{10}$  |
| 1200 | $1.29 \times 10^{-18}$ | $2.64 \times 10^{-17}$ | $1.43 \times 10^9$     | $2.50 \times 10^{10}$  |
|      | TS53                   | TS54                   | TS56                   | TS57                   |
| 600  | $1.63 \times 10^{12}$  | $7.78 \times 10^{-14}$ | $2.33 \times 10^{-15}$ | $1.49 \times 10^3$     |
| 700  | $1.82 \times 10^{12}$  | $1.65 \times 10^{-13}$ | $5.01 \times 10^{-15}$ | $1.02 \times 10^5$     |
| 800  | $1.98 \times 10^{12}$  | $2.99 \times 10^{-13}$ | $9.41 \times 10^{-15}$ | $6.13 \times 10^5$     |
| 900  | $2.11 \times 10^{12}$  | $4.89 \times 10^{-13}$ | $1.60 \times 10^{-14}$ | $2.49 \times 10^6$     |
| 1000 | $2.22 \times 10^{12}$  | $7.42 \times 10^{-13}$ | $2.54 \times 10^{-14}$ | $7.67 \times 10^6$     |
| 1100 | $2.31 \times 10^{12}$  | $1.04 \times 10^{-12}$ | $3.81 \times 10^{-14}$ | $1.93 \times 10^7$     |
| 1200 | $2.39 \times 10^{12}$  | $1.38 \times 10^{-12}$ | $5.47 \times 10^{-14}$ | $4.16 \times 10^7$     |

**Table S3. Cont.**

| T(K) | CVT/SCT Rate Constants |                        |                        |                        |
|------|------------------------|------------------------|------------------------|------------------------|
|      | TS59                   | TS60                   | TS61                   | TS64                   |
| 600  | $9.63 \times 10^7$     | $1.96 \times 10^6$     | $5.62 \times 10^7$     | $1.89 \times 10^{-13}$ |
| 700  | $3.76 \times 10^8$     | $0.75 \times 10^7$     | $2.37 \times 10^8$     | $3.49 \times 10^{-13}$ |
| 800  | $1.05 \times 10^9$     | $2.81 \times 10^7$     | $7.03 \times 10^8$     | $5.78 \times 10^{-13}$ |
| 900  | $2.35 \times 10^9$     | $0.69 \times 10^8$     | $1.65 \times 10^9$     | $8.32 \times 10^{-12}$ |
| 1000 | $4.48 \times 10^9$     | $2.61 \times 10^8$     | $3.28 \times 10^9$     | $1.21 \times 10^{-12}$ |
| 1100 | $7.62 \times 10^9$     | $5.89 \times 10^8$     | $5.79 \times 10^9$     | $1.67 \times 10^{-12}$ |
| 1200 | $1.19 \times 10^{10}$  | $1.16 \times 10^9$     | $9.34 \times 10^9$     | $2.22 \times 10^{-12}$ |
|      | TS65                   | TS67                   | TS68                   | TS72                   |
| 600  | $7.18 \times 10^{-14}$ | $5.48 \times 10^{-16}$ | $3.63 \times 10^{-14}$ | $2.65 \times 10^{-16}$ |
| 700  | $1.13 \times 10^{-13}$ | $2.37 \times 10^{-15}$ | $5.93 \times 10^{-14}$ | $3.34 \times 10^{-16}$ |
| 800  | $1.67 \times 10^{-13}$ | $7.47 \times 10^{-15}$ | $9.00 \times 10^{-14}$ | $3.97 \times 10^{-16}$ |
| 900  | $2.34 \times 10^{-13}$ | $1.89 \times 10^{-14}$ | $1.29 \times 10^{-13}$ | $4.56 \times 10^{-16}$ |
| 1000 | $3.18 \times 10^{-13}$ | $4.11 \times 10^{-14}$ | $1.78 \times 10^{-13}$ | $5.12 \times 10^{-16}$ |
| 1100 | $4.18 \times 10^{-13}$ | $7.93 \times 10^{-14}$ | $2.37 \times 10^{-13}$ | $5.66 \times 10^{-16}$ |
| 1200 | $5.37 \times 10^{-13}$ | $1.40 \times 10^{-13}$ | $3.09 \times 10^{-13}$ | $6.19 \times 10^{-16}$ |
|      | TS73                   | TS74                   | TS75                   | TS76                   |
| 600  | $7.27 \times 10^{-17}$ | $2.31 \times 10^{-15}$ | $8.34 \times 10^{-13}$ | $3.26 \times 10^8$     |
| 700  | $2.60 \times 10^{-16}$ | $5.02 \times 10^{-15}$ | $1.27 \times 10^{-12}$ | $1.60 \times 10^9$     |
| 800  | $7.06 \times 10^{-16}$ | $9.38 \times 10^{-15}$ | $1.80 \times 10^{-12}$ | $5.38 \times 10^9$     |
| 900  | $5.98 \times 10^{-16}$ | $1.58 \times 10^{-14}$ | $2.41 \times 10^{-12}$ | $1.27 \times 10^{10}$  |
| 1000 | $1.14 \times 10^{-15}$ | $2.46 \times 10^{-14}$ | $3.10 \times 10^{-12}$ | $2.77 \times 10^{10}$  |
| 1100 | $1.96 \times 10^{-15}$ | $3.62 \times 10^{-14}$ | $3.86 \times 10^{-12}$ | $5.27 \times 10^{10}$  |
| 1200 | $3.15 \times 10^{-15}$ | $5.09 \times 10^{-14}$ | $4.69 \times 10^{-12}$ | $9.06 \times 10^{10}$  |
|      | TS78                   | TS79                   | TS81                   | TS82                   |
| 600  | $3.44 \times 10^9$     | $6.58 \times 10^{10}$  | $1.63 \times 10^{-13}$ | $2.91 \times 10^{-18}$ |
| 700  | $8.12 \times 10^9$     | $8.65 \times 10^{10}$  | $3.31 \times 10^{-13}$ | $9.68 \times 10^{-18}$ |
| 800  | $1.47 \times 10^{10}$  | $1.06 \times 10^{11}$  | $5.79 \times 10^{-13}$ | $3.86 \times 10^{-17}$ |
| 900  | $2.44 \times 10^{10}$  | $1.24 \times 10^{11}$  | $9.15 \times 10^{-13}$ | $1.17 \times 10^{-16}$ |
| 1000 | $3.67 \times 10^{10}$  | $1.40 \times 10^{11}$  | $1.34 \times 10^{-12}$ | $2.92 \times 10^{-16}$ |
| 1100 | $5.12 \times 10^{10}$  | $1.54 \times 10^{11}$  | $1.86 \times 10^{-12}$ | $6.30 \times 10^{-16}$ |
| 1200 | $6.77 \times 10^{10}$  | $1.67 \times 10^{11}$  | $2.48 \times 10^{-12}$ | $1.22 \times 10^{-15}$ |

**Table S3. Cont.**

| <b>T(K)</b> | <b>CVT/SCT Rate Constants</b> |                        |                       |                    |
|-------------|-------------------------------|------------------------|-----------------------|--------------------|
|             | TS83                          | TS84                   | TS85                  | TS87               |
| 600         | $2.16 \times 10^{-16}$        | $9.58 \times 10^{-14}$ | $1.67 \times 10^8$    | $2.35 \times 10^7$ |
| 700         | $7.17 \times 10^{-16}$        | $2.06 \times 10^{-13}$ | $6.75 \times 10^9$    | $1.05 \times 10^8$ |
| 800         | $1.84 \times 10^{-15}$        | $3.78 \times 10^{-13}$ | $1.94 \times 10^9$    | $3.24 \times 10^8$ |
| 900         | $3.96 \times 10^{-15}$        | $6.19 \times 10^{-13}$ | $4.45 \times 10^9$    | $7.82 \times 10^8$ |
| 1000        | $7.50 \times 10^{-15}$        | $9.35 \times 10^{-13}$ | $8.67 \times 10^9$    | $1.59 \times 10^9$ |
| 1100        | $1.29 \times 10^{-14}$        | $1.33 \times 10^{-12}$ | $1.50 \times 10^{10}$ | $2.85 \times 10^9$ |
| 1200        | $2.07 \times 10^{-14}$        | $1.81 \times 10^{-12}$ | $2.39 \times 10^{10}$ | $4.63 \times 10^9$ |
|             | TS88                          |                        |                       |                    |
| 600         | $1.32 \times 10^7$            |                        |                       |                    |
| 700         | $1.01 \times 10^8$            |                        |                       |                    |
| 800         | $4.63 \times 10^8$            |                        |                       |                    |
| 900         | $1.52 \times 10^9$            |                        |                       |                    |
| 1000        | $3.96 \times 10^9$            |                        |                       |                    |
| 1100        | $8.65 \times 10^9$            |                        |                       |                    |
| 1200        | $1.66 \times 10^{10}$         |                        |                       |                    |

**Table S4.** Cartesian coordinates for the transition states involved in the formation of PCPT/DT/DFs from cross-condensation of 2-CPR and 2-CTPR.

|     |             |             |             |
|-----|-------------|-------------|-------------|
| TS1 |             |             |             |
| C   | 1.24766800  | 0.30313400  | -0.62941800 |
| C   | 1.94475800  | -0.86570500 | -0.36453500 |
| C   | 3.25283300  | -0.80627900 | 0.07763500  |
| C   | 3.86329500  | 0.42330600  | 0.24184600  |
| C   | 3.17212300  | 1.58855900  | -0.04652000 |
| C   | 1.86628700  | 1.52994300  | -0.49237400 |
| Cl  | 1.15861300  | -2.38302900 | -0.56381700 |
| H   | 3.77961700  | -1.72255200 | 0.28905600  |
| H   | 1.30961900  | 2.42165900  | -0.72592000 |
| C   | -1.17363000 | 0.34210900  | -0.47369800 |
| C   | -2.25731800 | 0.01139800  | -1.41515900 |
| C   | -3.31781100 | -0.70788600 | -1.04450200 |
| C   | -3.41349600 | -1.22747800 | 0.29102900  |
| C   | -2.44349800 | -1.01543600 | 1.20179500  |
| C   | -1.26913600 | -0.24392500 | 0.91581700  |
| Cl  | -1.48828900 | 2.23830400  | -0.15549900 |
| H   | -2.12682800 | 0.39164400  | -2.41517700 |
| H   | -2.51560300 | -1.41736200 | 2.19936300  |
| H   | -1.39064000 | 4.20804400  | 0.10189700  |
| H   | -4.28060200 | -1.80953400 | 0.56308200  |
| H   | 3.65229500  | 2.54707200  | 0.07071700  |
| S   | -0.14853300 | 0.03901500  | 2.06698200  |
| H   | -4.10218600 | -0.92088400 | -1.75305400 |
| H   | 4.88388200  | 0.46741100  | 0.58773000  |
| O   | -0.00762400 | 0.21002000  | -1.16656500 |
| TS2 |             |             |             |
| C   | 1.41993800  | -0.14168500 | -0.17108300 |
| C   | 1.54219300  | -1.52039500 | -0.19962300 |
| C   | 2.79861400  | -2.10330300 | -0.18519700 |
| C   | 3.93456400  | -1.31897000 | -0.13708000 |
| C   | 3.81294500  | 0.05945100  | -0.10438100 |
| C   | 2.56472300  | 0.64728900  | -0.12216300 |
| H   | 2.87923000  | -3.17857200 | -0.20625000 |
| C   | -0.91658000 | -0.18654200 | -0.32530200 |
| C   | -1.17002600 | -0.74673300 | -1.62780200 |
| C   | -2.05257300 | -1.76269800 | -1.77812900 |
| C   | -2.68003400 | -2.34498000 | -0.64522500 |

|    |             |             |             |
|----|-------------|-------------|-------------|
| C  | -2.37384600 | -1.93870700 | 0.61563600  |
| C  | -1.40989200 | -0.91864700 | 0.85742800  |
| Cl | -2.27826900 | 1.36716100  | -0.39292300 |
| H  | -0.67561500 | -0.27909700 | -2.46428900 |
| H  | -2.81594000 | -2.41187500 | 1.47730700  |
| O  | -3.12664000 | 3.24679800  | -0.06679400 |
| H  | -2.38473600 | 3.64972700  | 0.39912200  |
| H  | -3.39317600 | -3.14128400 | -0.79095900 |
| H  | 4.68449400  | 0.69273900  | -0.06589800 |
| H  | 4.91311200  | -1.77113200 | -0.12262200 |
| H  | -2.27609800 | -2.13954300 | -2.76347800 |
| O  | 0.23640700  | 0.52487700  | -0.18796600 |
| S  | -0.85353000 | -0.57111600 | 2.36920100  |
| Cl | 2.41729600  | 2.35896400  | -0.08762300 |
| H  | 0.66345600  | -2.14512200 | -0.22525700 |

TS3

|    |             |             |             |
|----|-------------|-------------|-------------|
| C  | 1.30697300  | 0.43460100  | -0.54509900 |
| C  | 2.52072000  | -0.21503100 | -0.39259400 |
| C  | 3.62449700  | 0.48270300  | 0.05609600  |
| C  | 3.51189900  | 1.83236300  | 0.33830200  |
| C  | 2.30281400  | 2.48140200  | 0.15898100  |
| C  | 1.19723700  | 1.78753700  | -0.29713000 |
| Cl | 2.62673200  | -1.90029800 | -0.71986500 |
| H  | 4.55988700  | -0.03749400 | 0.18345100  |
| H  | 0.25245400  | 2.28250000  | -0.44868100 |
| C  | -0.81782600 | -0.74563100 | -0.49488800 |
| C  | -1.67505400 | -1.39369700 | -1.47405100 |
| C  | -2.55098100 | -2.34518500 | -1.11719100 |
| C  | -2.64478600 | -2.76756200 | 0.24414200  |
| C  | -1.81817600 | -2.26511100 | 1.18565700  |
| C  | -0.79400000 | -1.30676300 | 0.88555600  |
| Cl | -2.03846600 | 0.90840400  | -0.03182600 |
| H  | -1.56844800 | -1.04671400 | -2.48855800 |
| H  | -1.86521800 | -2.60207100 | 2.20827400  |
| H  | -2.96328200 | 3.35953000  | -1.25581100 |
| H  | -3.37717100 | -3.51131100 | 0.51625600  |
| H  | 2.21526500  | 3.53616200  | 0.36552000  |
| S  | 0.29615600  | -0.87217500 | 2.02917400  |
| S  | -2.51756400 | 3.46851800  | -0.00045900 |
| H  | -3.18793500 | -2.79644400 | -1.86096600 |
| H  | 4.37458800  | 2.37516800  | 0.69081200  |
| O  | 0.26524800  | -0.26454700 | -1.10970800 |

## TS4

|    |             |             |             |
|----|-------------|-------------|-------------|
| C  | 1.32884000  | 0.30573100  | -0.59522700 |
| C  | 2.47848700  | -0.42650900 | -0.35054600 |
| C  | 3.61452800  | 0.21226200  | 0.10828300  |
| C  | 3.59648600  | 1.58120600  | 0.30295200  |
| C  | 2.45177200  | 2.30978400  | 0.02707600  |
| C  | 1.31389900  | 1.67586100  | -0.43467900 |
| Cl | 2.47059900  | -2.13211000 | -0.57968700 |
| H  | 4.50011500  | -0.36828700 | 0.30953800  |
| H  | 0.41562200  | 2.23080600  | -0.64945300 |
| C  | -0.86917100 | -0.70576100 | -0.50965200 |
| C  | -1.75932900 | -1.38139500 | -1.43531500 |
| C  | -2.67180300 | -2.27408900 | -1.00743800 |
| C  | -2.76291200 | -2.60730700 | 0.37426300  |
| C  | -1.91707000 | -2.06263800 | 1.28025400  |
| C  | -0.89420900 | -1.13007800 | 0.92208700  |
| Cl | -2.04356500 | 1.02516600  | -0.33175800 |
| H  | -1.64466200 | -1.11310500 | -2.47247000 |
| H  | -1.97319800 | -2.32668700 | 2.32359700  |
| Cl | -2.12812300 | 3.50399500  | 0.01310100  |
| H  | -3.51089300 | -3.31362800 | 0.69836500  |
| H  | 2.43976900  | 3.37875400  | 0.16721000  |
| S  | 0.13114100  | -0.54623800 | 2.06104900  |
| H  | -3.33186500 | -2.74722500 | -1.71646900 |
| H  | 4.48344500  | 2.07767800  | 0.66335600  |
| O  | 0.24810200  | -0.35134600 | -1.14012000 |

## TS5

|    |             |             |             |
|----|-------------|-------------|-------------|
| C  | -1.06794200 | 0.93521800  | 0.12707800  |
| C  | -1.28523400 | -0.44902800 | 0.41683600  |
| C  | -2.60667300 | -0.95192300 | 0.23371100  |
| C  | -3.58147300 | -0.17334600 | -0.31616600 |
| C  | -3.32966500 | 1.17178000  | -0.61816100 |
| C  | -2.08171200 | 1.71486400  | -0.38940900 |
| Cl | -0.41136700 | -1.13328700 | 1.76601000  |
| H  | -2.79487600 | -1.97249300 | 0.52421500  |
| H  | -1.85702300 | 2.74209600  | -0.62636000 |
| C  | 1.29257100  | 0.82461400  | 0.06641100  |
| C  | 2.44188600  | 1.39464800  | 0.58010600  |
| C  | 3.66751600  | 0.80903200  | 0.33701500  |
| C  | 3.73747100  | -0.35833900 | -0.40709300 |
| C  | 2.58185600  | -0.93297000 | -0.89605100 |



|   |             |             |             |
|---|-------------|-------------|-------------|
| C | 1.33591900  | -0.34709200 | -0.68340900 |
| H | 2.34990900  | 2.29747900  | 1.16257500  |
| H | 2.62775400  | -1.85516600 | -1.45425200 |
| H | 4.68902500  | -0.83064900 | -0.59338400 |
| H | -4.11267700 | 1.78734500  | -1.03079000 |
| S | -0.09966500 | -1.09016000 | -1.34194700 |
| O | 0.13233700  | 1.50536200  | 0.31364200  |
| H | -4.56342900 | -0.58737600 | -0.48138500 |
| H | 4.56339300  | 1.25957100  | 0.73401900  |

TS6

|    |             |             |             |
|----|-------------|-------------|-------------|
| C  | -0.91815100 | 0.18044300  | -0.36415400 |
| C  | -2.18073600 | 0.59035800  | 0.01879800  |
| C  | -3.24438800 | -0.29285500 | -0.02983600 |
| C  | -3.05418100 | -1.60106700 | -0.48913600 |
| C  | -1.81970300 | -2.02231500 | -0.89080900 |
| C  | -0.68422900 | -1.16878400 | -0.76584300 |
| Cl | -2.41965500 | 2.20097900  | 0.56821500  |
| H  | -4.21813900 | 0.04486300  | 0.28440500  |
| H  | 0.13919200  | -1.32706600 | -1.44943900 |
| C  | 1.38615400  | 0.63147700  | -0.21646100 |
| C  | 2.34177100  | 1.52399600  | -0.66678400 |
| C  | 3.68169900  | 1.22224100  | -0.53162300 |
| C  | 4.06243700  | 0.01926400  | 0.04292500  |
| C  | 3.10192200  | -0.87490900 | 0.47188900  |
| C  | 1.74435000  | -0.58367500 | 0.36481400  |
| H  | 2.01005700  | 2.45207600  | -1.10450100 |
| H  | 3.39201100  | -1.82072000 | 0.90252400  |
| H  | 5.10702900  | -0.22895700 | 0.14553100  |
| H  | -1.67086700 | -3.01760900 | -1.27713200 |
| S  | 0.53943500  | -1.71072300 | 0.93903300  |
| H  | -3.90135300 | -2.26560300 | -0.54920600 |
| H  | 4.42510800  | 1.92285200  | -0.87744200 |
| O  | 0.08980700  | 1.05625600  | -0.30269900 |

TS7

|    |             |             |             |
|----|-------------|-------------|-------------|
| C  | -0.94056400 | 0.07110500  | 0.16590800  |
| C  | -2.20926100 | 0.57617500  | -0.03902100 |
| C  | -3.25537700 | -0.26853300 | -0.37576400 |
| C  | -3.03073000 | -1.62969500 | -0.50541600 |
| C  | -1.76843400 | -2.14818300 | -0.32350700 |
| C  | -0.68951800 | -1.29306100 | -0.05983000 |
| Cl | -2.49697100 | 2.25991000  | 0.15677400  |

|   |             |             |             |
|---|-------------|-------------|-------------|
| H | -4.23761700 | 0.14956100  | -0.52172500 |
| H | -0.07696700 | -1.06043600 | -1.72138200 |
| C | 1.33594300  | 0.65946700  | 0.18114200  |
| C | 2.13061600  | 1.75030500  | -0.10758400 |
| C | 3.46666400  | 1.55841500  | -0.40614400 |
| C | 3.99687900  | 0.27909300  | -0.43336600 |
| C | 3.18879800  | -0.81041300 | -0.16257200 |
| C | 1.85477100  | -0.62533500 | 0.16361400  |
| H | 1.68717900  | 2.73266000  | -0.08466200 |
| H | 3.58860300  | -1.81204400 | -0.19756000 |
| H | 5.03665100  | 0.12560100  | -0.67478500 |
| H | -1.58289700 | -3.20597000 | -0.42027400 |
| S | 0.81173600  | -1.97027000 | 0.59110900  |
| H | 4.09164400  | 2.40979700  | -0.62459900 |
| H | -3.85293100 | -2.28551300 | -0.74271100 |
| O | 0.04104300  | 0.91702000  | 0.53500400  |

TS8

|    |             |             |             |
|----|-------------|-------------|-------------|
| C  | 0.78430400  | 0.12970200  | -0.35520700 |
| C  | 0.90011300  | 1.48346800  | -0.83128600 |
| C  | 2.08764300  | 2.15271800  | -0.75731100 |
| C  | 3.23770900  | 1.49530100  | -0.31754900 |
| C  | 3.19620700  | 0.13950800  | 0.00493600  |
| C  | 2.01952600  | -0.55329200 | -0.07265100 |
| H  | 2.13856400  | 3.18770100  | -1.05561100 |
| C  | -1.62963200 | 0.27126600  | 0.67774400  |
| C  | -2.91081900 | 0.58058500  | 1.10332500  |
| C  | -3.99487700 | 0.27629500  | 0.29346800  |
| C  | -3.80645700 | -0.32245200 | -0.94015300 |
| C  | -2.52717900 | -0.62454900 | -1.38425700 |
| C  | -1.46361900 | -0.32532100 | -0.56630100 |
| H  | -3.05945200 | 1.04677100  | 2.06437200  |
| H  | 4.09382900  | -0.38206600 | 0.29510800  |
| H  | -4.99143600 | 0.51409600  | 0.63099300  |
| H  | -2.35110300 | -1.08820000 | -2.34149700 |
| H  | -0.00335400 | 1.95605000  | -1.18486300 |
| Cl | 1.95250100  | -2.22144800 | 0.27680100  |
| S  | -0.14840800 | 0.50426300  | 1.55882200  |
| H  | 4.17523500  | 2.02422700  | -0.25729700 |
| H  | -4.65431000 | -0.55143300 | -1.56617600 |
| O  | -0.19043300 | -0.65376400 | -0.92004400 |

TS9

|    |             |             |             |
|----|-------------|-------------|-------------|
| C  | 0.86624300  | -0.08010700 | -0.44005500 |
| C  | 2.08787400  | 0.35047100  | 0.15985400  |
| C  | 3.12057600  | -0.53144300 | 0.36217600  |
| C  | 3.02065800  | -1.84279000 | -0.08382600 |
| C  | 1.87722900  | -2.27602800 | -0.75248500 |
| C  | 0.84362400  | -1.40693200 | -0.96258800 |
| H  | 4.01123800  | -0.18948200 | 0.86350500  |
| C  | -1.43149000 | -0.29572100 | 0.69933200  |
| C  | -2.49827900 | -0.87064300 | 1.37829500  |
| C  | -3.78955300 | -0.66630000 | 0.91744000  |
| C  | -4.02773200 | 0.06588700  | -0.23217100 |
| C  | -2.96304400 | 0.61414100  | -0.93643900 |
| C  | -1.68192100 | 0.44188100  | -0.46063100 |
| H  | -2.30172100 | -1.44719000 | 2.26771600  |
| H  | 1.81343000  | -3.28834300 | -1.11832300 |
| H  | -5.03418300 | 0.19744600  | -0.59616800 |
| H  | 3.84275100  | -2.52095800 | 0.08195200  |
| H  | -4.61559100 | -1.10377500 | 1.45671900  |
| S  | -0.22735800 | 1.11853300  | -1.17899100 |
| O  | -0.18519400 | -0.40671100 | 1.12200800  |
| H  | -3.13463900 | 1.16635400  | -1.84761600 |
| H  | -0.04630000 | -1.71408100 | -1.49017400 |
| Cl | 2.23760000  | 1.95545200  | 0.72804600  |

TS10

|    |             |             |             |
|----|-------------|-------------|-------------|
| C  | 1.01737500  | -0.09296800 | -0.35156900 |
| C  | 2.34646600  | -0.22219700 | 0.02661900  |
| C  | 3.17633800  | 0.87991400  | 0.08664400  |
| C  | 2.69287700  | 2.14953100  | -0.24296900 |
| C  | 1.39876200  | 2.30366300  | -0.65523300 |
| C  | 0.52809900  | 1.19480100  | -0.69186000 |
| Cl | 2.97292800  | -1.77069000 | 0.44940900  |
| H  | 4.19892100  | 0.74684900  | 0.40084500  |
| H  | -0.34631400 | 1.25319300  | -1.32053400 |
| C  | -1.62312700 | -0.62054900 | -0.13757500 |
| C  | -2.75930500 | -1.29169700 | -0.55473500 |
| C  | -4.01705200 | -0.76140700 | -0.31532300 |
| C  | -4.13170200 | 0.46422500  | 0.31656500  |
| C  | -3.00080000 | 1.16966900  | 0.68644900  |
| C  | -1.72997500 | 0.63589900  | 0.48367600  |
| H  | -2.65875900 | -2.24095400 | -1.05928800 |
| H  | -3.07078600 | 2.13885900  | 1.15427800  |
| H  | -5.10602200 | 0.89117700  | 0.49811900  |

|      |             |             |             |
|------|-------------|-------------|-------------|
| H    | 1.02060400  | 3.26842300  | -0.95161500 |
| H    | 3.35798300  | 2.99661600  | -0.19104600 |
| H    | -4.89567300 | -1.29976800 | -0.63283000 |
| O    | -0.66193500 | 1.31796900  | 0.85540000  |
| S    | -0.07074900 | -1.44060800 | -0.26782600 |
| TS11 |             |             |             |
| C    | 0.99283300  | -0.05038700 | 0.16173800  |
| C    | 2.33944000  | -0.20434400 | -0.11888500 |
| C    | 3.16325000  | 0.88729900  | -0.33927500 |
| C    | 2.63784900  | 2.16804800  | -0.26369100 |
| C    | 1.30194700  | 2.35856100  | 0.00088000  |
| C    | 0.45821200  | 1.25199700  | 0.12927400  |
| Cl   | 3.02184300  | -1.78717200 | -0.14491100 |
| H    | 4.20818800  | 0.72470700  | -0.54451000 |
| H    | -0.06320400 | 1.14490400  | -1.58197000 |
| C    | -1.59674400 | -0.68813700 | 0.11818800  |
| C    | -2.66007400 | -1.49469000 | -0.25763600 |
| C    | -3.90990100 | -0.94280400 | -0.47367200 |
| C    | -4.09833600 | 0.42216100  | -0.33575800 |
| C    | -3.03681000 | 1.23631600  | 0.01389500  |
| C    | -1.79752500 | 0.67580600  | 0.24635000  |
| H    | -2.50375900 | -2.55621100 | -0.37398200 |
| H    | -3.14868900 | 2.30357300  | 0.11775800  |
| H    | -5.07000500 | 0.85669000  | -0.50964500 |
| H    | 0.86482200  | 3.34012500  | 0.07920200  |
| H    | -4.73243100 | -1.58028100 | -0.75653000 |
| H    | 3.28569000  | 3.01863400  | -0.40213200 |
| O    | -0.78601100 | 1.50324800  | 0.63218600  |
| S    | -0.04304400 | -1.41344800 | 0.50558500  |
| TS12 |             |             |             |
| C    | -1.09591600 | -0.58672900 | 0.21900500  |
| C    | -1.50133500 | 0.78390800  | 0.28564400  |
| C    | -2.71440700 | 1.19513100  | -0.22164000 |
| C    | -3.61475400 | 0.26060900  | -0.69946000 |
| C    | -3.30143800 | -1.10287200 | -0.66657600 |
| C    | -2.09227600 | -1.52055000 | -0.19629700 |
| Cl   | -0.41976200 | 1.94362200  | 0.91909400  |
| H    | -2.95686700 | 2.24527500  | -0.21791700 |
| C    | 1.20674000  | -0.23362400 | -0.87899500 |
| C    | 2.19172900  | 0.33302200  | -1.68094200 |
| C    | 3.48628400  | 0.43226500  | -1.19961100 |

|      |             |             |             |
|------|-------------|-------------|-------------|
| C    | 3.79988100  | 0.02405100  | 0.08594800  |
| C    | 2.81005400  | -0.49193900 | 0.91261200  |
| C    | 1.52986300  | -0.62194300 | 0.42409400  |
| H    | 1.93259100  | 0.65292000  | -2.67717300 |
| H    | -4.02200700 | -1.82803100 | -1.01031900 |
| H    | -1.83044500 | -2.56567000 | -0.17276200 |
| H    | 3.03743500  | -0.77395900 | 1.92908600  |
| H    | 4.80625000  | 0.12798600  | 0.45926500  |
| S    | 0.15021100  | -1.22741300 | 1.32497400  |
| H    | -4.56794000 | 0.58786700  | -1.08334900 |
| H    | 4.25382700  | 0.84973100  | -1.83281300 |
| O    | -0.01835100 | -0.44088300 | -1.31511300 |
| TS13 |             |             |             |
| C    | 1.24825300  | 0.85286900  | -0.06722000 |
| C    | 1.33691300  | -0.53538600 | -0.34642500 |
| C    | 2.47277000  | -1.24277900 | 0.12585200  |
| C    | 3.44141600  | -0.59596400 | 0.82882400  |
| C    | 3.35806500  | 0.78457800  | 1.07984800  |
| C    | 2.26510100  | 1.48834100  | 0.64594500  |
| Cl   | 0.63835500  | -1.14265400 | -1.82041700 |
| H    | 2.54276200  | -2.29373000 | -0.09959300 |
| H    | 2.15848100  | 2.53786100  | 0.87331600  |
| C    | -1.43878000 | 0.60785400  | -0.12665100 |
| C    | -2.73769300 | 1.02508700  | -0.41711500 |
| C    | -3.82484600 | 0.34645600  | 0.07545600  |
| C    | -3.62086500 | -0.76078800 | 0.89967500  |
| C    | -2.35300500 | -1.19112900 | 1.19058600  |
| C    | -1.22040100 | -0.57190100 | 0.62330700  |
| H    | -2.87896400 | 1.91311400  | -1.01550700 |
| H    | -2.17811200 | -2.06120800 | 1.80257700  |
| H    | -4.46663400 | -1.29186900 | 1.30875200  |
| H    | 4.13805100  | 1.28248800  | 1.63261900  |
| H    | 4.29797600  | -1.15076700 | 1.17912200  |
| H    | -4.82247100 | 0.68461700  | -0.15355300 |
| O    | -0.07018900 | -1.14533100 | 0.79560000  |
| S    | -0.16519900 | 1.73273900  | -0.50112200 |
| TS14 |             |             |             |
| C    | 1.67023200  | 0.13821900  | 0.02583300  |
| C    | 2.97487000  | -0.29267600 | -0.18833500 |
| C    | 4.05221600  | 0.50143300  | 0.15420300  |
| C    | 3.84065900  | 1.74058600  | 0.72924000  |

|    |             |             |             |
|----|-------------|-------------|-------------|
| C  | 2.54818300  | 2.18209700  | 0.94233800  |
| C  | 1.46953500  | 1.39412000  | 0.58235000  |
| Cl | 3.27367900  | -1.83318600 | -0.90334400 |
| H  | 5.04960600  | 0.13535200  | -0.02770600 |
| H  | 0.46863700  | 1.77412600  | 0.69677400  |
| C  | -0.61072400 | -0.67963000 | 0.40294200  |
| C  | -1.02965600 | -2.03393600 | 0.76812000  |
| C  | -2.32328600 | -2.35224900 | 0.86619400  |
| C  | -3.33821500 | -1.39043000 | 0.54765800  |
| C  | -3.03045800 | -0.16123900 | 0.08996500  |
| C  | -1.65255900 | 0.25275900  | -0.14843300 |
| H  | -4.37557900 | -1.66549000 | 0.65632300  |
| H  | -0.29227900 | -0.18406100 | 1.44051800  |
| Cl | -4.27878900 | 0.93132800  | -0.33902500 |
| H  | 2.36845000  | 3.15339100  | 1.37511200  |
| H  | -0.24829800 | -2.73672700 | 1.00912400  |
| H  | 0.06917000  | 0.28533200  | 2.45668900  |
| H  | -2.62598400 | -3.33622100 | 1.18654600  |
| H  | 4.68333700  | 2.35614000  | 1.00110800  |
| O  | 0.63610100  | -0.77849800 | -0.37739400 |
| S  | -1.28273600 | 1.62396200  | -0.89297000 |

TS15

|    |             |             |             |
|----|-------------|-------------|-------------|
| C  | -1.69391100 | -0.05132100 | -0.03194700 |
| C  | -3.02555400 | 0.30935700  | -0.21919200 |
| C  | -4.02677100 | -0.63613700 | -0.12562300 |
| C  | -3.71359300 | -1.95301100 | 0.16090800  |
| C  | -2.39272700 | -2.31432000 | 0.34665400  |
| C  | -1.38437400 | -1.37214700 | 0.24397800  |
| Cl | -3.42415600 | 1.94775800  | -0.56319500 |
| H  | -5.04861900 | -0.32770300 | -0.27640300 |
| H  | -0.35841900 | -1.68103600 | 0.35626400  |
| C  | 0.52806500  | 0.80949500  | 0.21209200  |
| C  | 1.06329700  | 2.05738700  | 0.76038000  |
| C  | 2.38816500  | 2.17905300  | 0.91773200  |
| C  | 3.26118800  | 1.15315600  | 0.43452600  |
| C  | 2.80849900  | 0.15317300  | -0.35765300 |
| C  | 1.41596500  | 0.08759700  | -0.75046100 |
| H  | 4.31646900  | 1.21113200  | 0.64936700  |
| H  | 0.64206600  | 0.09807100  | 1.17144900  |
| Cl | 3.91831500  | -0.96042700 | -1.03674600 |
| H  | -0.24748900 | -1.05665600 | 2.93545200  |
| H  | -2.13184400 | -3.33917000 | 0.55826100  |

|      |             |             |             |
|------|-------------|-------------|-------------|
| H    | 0.35060100  | 2.77667400  | 1.12986000  |
| S    | 0.86035500  | -0.68332400 | -2.06659800 |
| S    | 1.06127200  | -0.87878300 | 2.72016300  |
| H    | -4.49915300 | -2.68802500 | 0.23149500  |
| H    | 2.81364300  | 3.03649000  | 1.41286300  |
| O    | -0.79418700 | 0.95570200  | -0.12187800 |
| TS16 |             |             |             |
| C    | -1.57079300 | 0.08731800  | 0.14445700  |
| C    | -2.87194300 | -0.18737500 | 0.58835200  |
| C    | -3.91187300 | 0.63375100  | 0.22951100  |
| C    | -3.68055000 | 1.74309600  | -0.57921600 |
| C    | -2.40466400 | 2.02481100  | -1.01561900 |
| C    | -1.34571500 | 1.21051600  | -0.65309600 |
| Cl   | -3.15588800 | -1.56726800 | 1.56887200  |
| H    | -4.90535200 | 0.40149600  | 0.57695200  |
| H    | -0.34723700 | 1.47543000  | -0.94975200 |
| C    | 0.63875800  | -0.76419500 | -0.02172600 |
| C    | 1.15382900  | -2.13481800 | -0.14618900 |
| C    | 2.46799600  | -2.34050500 | -0.28101600 |
| C    | 3.37982200  | -1.24291000 | -0.16366800 |
| C    | 2.97149800  | -0.01432400 | 0.22281200  |
| C    | 1.58913400  | 0.25309700  | 0.55616200  |
| H    | 4.43073500  | -1.40865700 | -0.34075900 |
| H    | 0.54618100  | -0.45701200 | -1.12926200 |
| Cl   | 4.13204800  | 1.22493400  | 0.45955000  |
| H    | -2.21470600 | 2.88487300  | -1.63643000 |
| H    | 0.42061700  | -2.91764400 | -0.25337100 |
| S    | 1.09478800  | 1.51477400  | 1.44874000  |
| Cl   | -0.22461400 | -0.39668700 | -2.93996800 |
| H    | -4.50579600 | 2.38036800  | -0.85358200 |
| H    | 2.85891700  | -3.32408800 | -0.48357500 |
| O    | -0.63365300 | -0.78982300 | 0.51270600  |
| TS17 |             |             |             |
| C    | 1.62528100  | 0.86828000  | -0.31490100 |
| C    | 1.63242900  | -0.24002400 | 0.58725000  |
| C    | 2.79393000  | -1.06668700 | 0.58963900  |
| C    | 3.78665500  | -0.87713500 | -0.32635000 |
| C    | 3.73308500  | 0.19879100  | -1.22261800 |
| C    | 2.65851500  | 1.06505400  | -1.20499700 |
| Cl   | 0.87149900  | -0.00818600 | 2.14240400  |
| H    | 2.84238700  | -1.85578500 | 1.32196700  |

|      |             |             |             |
|------|-------------|-------------|-------------|
| H    | 2.58383600  | 1.89197400  | -1.89222500 |
| C    | -0.69776700 | 1.30221700  | -0.21034800 |
| C    | -1.62536600 | 2.30431800  | -0.00293700 |
| C    | -2.96533400 | 1.98957500  | 0.07941800  |
| C    | -3.37638100 | 0.67421600  | -0.03620100 |
| C    | -2.43351000 | -0.31430000 | -0.22807500 |
| C    | -1.06792200 | -0.03824500 | -0.32376100 |
| H    | -4.41812800 | 0.40650700  | 0.02426800  |
| Cl   | -2.97350000 | -1.94597500 | -0.37574000 |
| H    | 4.53313300  | 0.35202900  | -1.92866200 |
| H    | -1.27203200 | 3.31914100  | 0.08095600  |
| S    | 0.08744700  | -1.32023400 | -0.56816900 |
| H    | 4.63761400  | -1.53959200 | -0.33099200 |
| H    | -3.69335500 | 2.76989700  | 0.23266600  |
| O    | 0.59246400  | 1.72549300  | -0.34591000 |
| TS18 |             |             |             |
| C    | -1.44959900 | 0.19946400  | 0.36917900  |
| C    | -2.73005400 | 0.27963600  | -0.14150400 |
| C    | -3.58448800 | -0.80469700 | -0.04588200 |
| C    | -3.16389200 | -1.98001900 | 0.58699200  |
| C    | -1.90846300 | -2.07373800 | 1.11455500  |
| C    | -0.97322800 | -1.00939000 | 0.95448900  |
| Cl   | -3.24958000 | 1.72600600  | -0.90914700 |
| H    | -4.57614400 | -0.72623900 | -0.46000500 |
| H    | -0.19823500 | -0.90682800 | 1.70239400  |
| C    | 0.71594500  | 1.12215200  | 0.30741600  |
| C    | 1.40827200  | 2.24688600  | 0.71326200  |
| C    | 2.78727900  | 2.24241500  | 0.69619500  |
| C    | 3.47214600  | 1.11530700  | 0.27892000  |
| C    | 2.76459000  | -0.00427700 | -0.11015400 |
| C    | 1.36858600  | -0.04093900 | -0.11017800 |
| H    | 4.54903100  | 1.09283900  | 0.25686800  |
| Cl   | 3.64311000  | -1.39371800 | -0.62996100 |
| H    | -1.58790600 | -2.96314900 | 1.63225500  |
| H    | 0.84462100  | 3.11276900  | 1.02045300  |
| S    | 0.48032500  | -1.46263000 | -0.58803000 |
| H    | 3.33300800  | 3.11890300  | 1.00644400  |
| H    | -3.85426500 | -2.80332900 | 0.67857700  |
| O    | -0.64098400 | 1.25892600  | 0.25707100  |
| TS19 |             |             |             |
| C    | 1.44579300  | 0.02340400  | 0.15317000  |



|    |             |             |             |
|----|-------------|-------------|-------------|
| C  | 2.79992800  | 0.21069400  | -0.03915400 |
| C  | 3.61726100  | -0.86352000 | -0.35575700 |
| C  | 3.07485400  | -2.13255400 | -0.48158500 |
| C  | 1.72394900  | -2.33306100 | -0.30974500 |
| C  | 0.87971300  | -1.24318100 | -0.05888200 |
| Cl | 3.47496600  | 1.78060500  | 0.14515300  |
| H  | 4.67245800  | -0.69352800 | -0.49199000 |
| H  | 0.33698700  | -0.87891900 | -1.72465000 |
| C  | -0.63798600 | 1.12362300  | 0.16146000  |
| C  | -1.16065300 | 2.36670200  | -0.12901200 |
| C  | -2.51239000 | 2.48946400  | -0.38850700 |
| C  | -3.33482600 | 1.37868100  | -0.36838500 |
| C  | -2.79128900 | 0.13881200  | -0.08981400 |
| C  | -1.43811800 | -0.01159200 | 0.18430100  |
| H  | -4.39048200 | 1.46085800  | -0.56686900 |
| Cl | -3.82305800 | -1.24095900 | -0.05203200 |
| H  | 1.29163000  | -3.31663800 | -0.40175600 |
| H  | -0.49860800 | 3.21686300  | -0.13426000 |
| S  | -0.73524300 | -1.56280600 | 0.59008500  |
| H  | -2.93008000 | 3.45874300  | -0.60867200 |
| H  | 3.71882100  | -2.96730600 | -0.70699800 |
| O  | 0.68541400  | 1.08324900  | 0.49278000  |

TS20

|    |             |             |             |
|----|-------------|-------------|-------------|
| C  | -1.43027600 | -0.19801500 | -0.62171100 |
| C  | -1.97855000 | -0.45664900 | 0.68568600  |
| C  | -3.17277000 | 0.10329400  | 1.06296500  |
| C  | -3.93849800 | 0.79933800  | 0.13642100  |
| C  | -3.52611000 | 0.89089300  | -1.19829900 |
| C  | -2.33509100 | 0.35466100  | -1.58629500 |
| Cl | -1.06660100 | -1.38894900 | 1.78727600  |
| H  | -3.51725000 | -0.02708300 | 2.07588900  |
| C  | 1.17607800  | 0.24857000  | -0.28879600 |
| C  | 2.51292600  | 0.39910300  | 0.04074500  |
| C  | 3.40836200  | -0.64636300 | -0.11199500 |
| C  | 2.96283700  | -1.86013000 | -0.59966800 |
| C  | 1.62985800  | -2.04251900 | -0.93517300 |
| C  | 0.76656200  | -0.98672200 | -0.77432100 |
| H  | -4.16289000 | 1.36744700  | -1.92628500 |
| H  | -1.99167700 | 0.38628600  | -2.60731800 |
| H  | 4.44217600  | -0.49844200 | 0.15318300  |
| H  | 1.25963200  | -2.98241500 | -1.31007500 |
| Cl | 3.06459500  | 1.92135800  | 0.63207500  |

|      |             |             |             |
|------|-------------|-------------|-------------|
| S    | -0.05749100 | 1.46005300  | -0.18620900 |
| H    | -4.87836800 | 1.22972100  | 0.44279400  |
| H    | 3.65899300  | -2.67524100 | -0.71563400 |
| O    | -0.53857900 | -1.10560600 | -1.13994200 |
| TS21 |             |             |             |
| C    | -1.23342600 | -0.08460200 | 0.40566500  |
| C    | -1.34637600 | 0.84675700  | 1.47853800  |
| C    | -2.52597600 | 1.48113700  | 1.75147100  |
| C    | -3.67019500 | 1.15557700  | 1.02585500  |
| C    | -3.62343800 | 0.18631700  | 0.03273400  |
| C    | -2.44293400 | -0.45355800 | -0.25523000 |
| H    | -2.57332500 | 2.21656300  | 2.53852100  |
| C    | 0.79235300  | 1.07413400  | -0.70923000 |
| C    | 1.64064700  | 2.07824000  | -1.15744600 |
| C    | 3.00844700  | 1.93604100  | -0.98975800 |
| C    | 3.54409800  | 0.83294200  | -0.35264100 |
| C    | 2.68875900  | -0.15139500 | 0.11927800  |
| C    | 1.32622200  | -0.04115900 | -0.05655300 |
| H    | -4.51172500 | -0.07808800 | -0.51728400 |
| H    | 3.66836100  | 2.70980000  | -1.34976600 |
| H    | -4.60610400 | 1.64709200  | 1.23986600  |
| H    | 4.60601900  | 0.73026800  | -0.20436000 |
| O    | -0.51021500 | 1.12313000  | -0.90457700 |
| S    | 0.13682500  | -1.22674800 | 0.44231900  |
| H    | -0.45091300 | 1.06615900  | 2.03927600  |
| H    | 1.21827200  | 2.93788600  | -1.65088700 |
| Cl   | -2.41253300 | -1.62710400 | -1.49614900 |
| Cl   | 3.32975800  | -1.53462200 | 0.92603400  |
| TS22 |             |             |             |
| C    | -1.33248100 | -0.08803900 | 0.29840700  |
| C    | -2.61891500 | -0.45693800 | -0.06950400 |
| C    | -3.67353800 | 0.42362300  | 0.06931400  |
| C    | -3.46541200 | 1.70282400  | 0.59259200  |
| C    | -2.21573000 | 2.08218700  | 0.99665100  |
| C    | -1.12281900 | 1.20726100  | 0.83455200  |
| Cl   | -2.91307900 | -2.02248800 | -0.72514900 |
| H    | -4.65771200 | 0.11171700  | -0.24083800 |
| H    | -0.24012400 | 1.37319500  | 1.43141200  |
| C    | 1.33106700  | 0.00776900  | -0.09594300 |
| C    | 2.63251500  | -0.42035700 | 0.12224300  |
| C    | 3.71930300  | 0.40862300  | -0.10131300 |

|    |             |             |             |
|----|-------------|-------------|-------------|
| C  | 3.49773100  | 1.70244000  | -0.52895800 |
| C  | 2.21125400  | 2.17283300  | -0.71206000 |
| C  | 1.11644600  | 1.33474400  | -0.52023100 |
| H  | 2.01947600  | 3.18639800  | -1.02466100 |
| H  | 4.33646500  | 2.35964800  | -0.69711600 |
| H  | -2.04389000 | 3.04987400  | 1.43898200  |
| H  | -4.30352400 | 2.37322500  | 0.69560600  |
| H  | 4.71477100  | 0.03424600  | 0.06832300  |
| O  | -0.09739200 | 1.80168900  | -0.73525300 |
| S  | 0.00975800  | -1.14828000 | 0.00682900  |
| Cl | 2.93196200  | -2.03581600 | 0.65377000  |

TS23

|    |             |             |             |
|----|-------------|-------------|-------------|
| C  | -1.33467400 | 0.02107000  | 0.18371400  |
| C  | -2.58998400 | -0.49227000 | -0.11865600 |
| C  | -3.67254500 | 0.33718800  | -0.34422400 |
| C  | -3.50419200 | 1.70675000  | -0.27644600 |
| C  | -2.26390100 | 2.24423600  | 0.01214800  |
| C  | -1.19810400 | 1.40123000  | 0.24606400  |
| Cl | -2.82144300 | -2.19927300 | -0.18174200 |
| H  | -4.63223000 | -0.09766600 | -0.56859300 |
| H  | 0.58637600  | 1.36852000  | -1.61609100 |
| C  | 1.13217700  | 1.40430100  | 0.09117300  |
| C  | 2.22342900  | 2.26103900  | -0.07641200 |
| C  | 3.46745400  | 1.73362900  | -0.33409300 |
| C  | 3.65567900  | 0.36094500  | -0.36370400 |
| C  | 2.58806000  | -0.48186500 | -0.10319300 |
| C  | 1.32560000  | 0.01352200  | 0.17349900  |
| H  | 2.04589700  | 3.32280600  | -0.03440800 |
| H  | -2.10206600 | 3.30812700  | 0.06817500  |
| H  | 4.62469400  | -0.06461300 | -0.56438300 |
| Cl | 2.85797100  | -2.18396900 | -0.07457500 |
| S  | -0.00018700 | -1.05660600 | 0.55193100  |
| O  | -0.00942300 | 1.97200800  | 0.58238900  |
| H  | 4.30542900  | 2.39051000  | -0.50313500 |
| H  | -4.34469900 | 2.35841200  | -0.45341800 |

TS24

|   |            |             |             |
|---|------------|-------------|-------------|
| C | 1.40185200 | -0.47209100 | -0.40491300 |
| C | 2.34660100 | -0.77491600 | -1.42951400 |
| C | 3.66275400 | -0.44493600 | -1.29853100 |
| C | 4.12519100 | 0.15298700  | -0.12121100 |
| C | 3.26045600 | 0.38376200  | 0.93366900  |

|    |             |             |             |
|----|-------------|-------------|-------------|
| C  | 1.93447100  | 0.02779200  | 0.82501700  |
| H  | 4.35066400  | -0.65145400 | -2.10291800 |
| C  | -0.60569300 | 1.14233900  | -0.67895100 |
| C  | -1.37418800 | 2.29984900  | -0.62723800 |
| C  | -2.72792500 | 2.20243300  | -0.35478400 |
| C  | -3.32233700 | 0.98263500  | -0.08833200 |
| C  | -2.54087800 | -0.16261200 | -0.09831200 |
| C  | -1.19702600 | -0.09059800 | -0.38937300 |
| H  | -0.90519500 | 3.24740500  | -0.83469500 |
| H  | 3.61485300  | 0.81843900  | 1.85398500  |
| H  | -4.37148800 | 0.90880400  | 0.14416100  |
| H  | 5.16512900  | 0.42145400  | -0.02349500 |
| H  | -3.32914400 | 3.09797900  | -0.33668700 |
| S  | -0.09282500 | -1.44736600 | -0.42052100 |
| O  | 0.66287400  | 1.16266800  | -1.02782400 |
| H  | 1.96967400  | -1.22979100 | -2.33084200 |
| Cl | 0.89082800  | 0.26921900  | 2.15409500  |
| Cl | -3.24917800 | -1.69487600 | 0.25627300  |

TS25

|    |             |             |             |
|----|-------------|-------------|-------------|
| C  | -1.44350800 | 0.86376700  | -0.21001900 |
| C  | -2.37063400 | 1.45544800  | -1.06768500 |
| C  | -3.62660100 | 0.92391900  | -1.21060200 |
| C  | -3.97822600 | -0.23977800 | -0.50517100 |
| C  | -3.10259100 | -0.83122000 | 0.35197400  |
| C  | -1.80079100 | -0.29696200 | 0.52246300  |
| H  | -4.33432000 | 1.38406000  | -1.88099800 |
| C  | 0.57460800  | -1.21637500 | -0.51884900 |
| C  | 1.46843100  | -2.23789800 | -0.88941700 |
| C  | 2.82373300  | -2.06515400 | -0.78439800 |
| C  | 3.35946800  | -0.85248100 | -0.36396400 |
| C  | 2.50150800  | 0.18202500  | -0.08300000 |
| C  | 1.11465200  | 0.04750700  | -0.17916700 |
| H  | 1.03885200  | -3.17953600 | -1.18904600 |
| H  | -3.37029500 | -1.70526500 | 0.92169600  |
| H  | 4.42282000  | -0.70358600 | -0.28275700 |
| H  | 3.48514700  | -2.88290300 | -1.02472300 |
| H  | -4.96457000 | -0.65967300 | -0.62680600 |
| H  | -2.06847800 | 2.31993200  | -1.63836200 |
| Cl | -1.06270900 | -0.59097100 | 2.06300700  |
| Cl | 3.16322400  | 1.71868600  | 0.35199100  |
| O  | -0.68738300 | -1.52016400 | -0.47793200 |
| S  | 0.15380400  | 1.50127100  | -0.11771900 |

## TS26

|    |             |             |             |
|----|-------------|-------------|-------------|
| C  | 1.32962800  | 0.28142400  | -0.63444000 |
| C  | 1.97834100  | -0.86758400 | -0.18735300 |
| C  | 3.21714900  | -0.78295800 | 0.42136800  |
| C  | 3.81605500  | 0.45071700  | 0.59114600  |
| C  | 3.18707700  | 1.60077800  | 0.14787800  |
| C  | 1.95358100  | 1.51149400  | -0.46571500 |
| Cl | 1.26739000  | -2.42618300 | -0.37293500 |
| H  | 3.69960400  | -1.68431500 | 0.76215000  |
| H  | 1.45456300  | 2.39712200  | -0.82427000 |
| C  | -1.42889700 | 0.54118600  | -0.19456800 |
| C  | -2.74814100 | 0.41255400  | -0.84481600 |
| C  | -3.58359300 | -0.57554800 | -0.52247400 |
| C  | -3.23547800 | -1.55197300 | 0.48592600  |
| C  | -2.10159800 | -1.46798300 | 1.19177800  |
| C  | -1.18645800 | -0.34469700 | 1.01820200  |
| Cl | -1.30957000 | 2.34425900  | 0.43350500  |
| H  | -2.98541900 | 1.13358800  | -1.61158000 |
| H  | -1.84717400 | -2.16910100 | 1.97026400  |
| H  | -1.13639200 | 3.99126600  | 1.15090200  |
| H  | -3.92588100 | -2.36056100 | 0.67431200  |
| H  | 3.65535500  | 2.56372800  | 0.27554200  |
| H  | -4.53373000 | -0.66295100 | -1.02549900 |
| H  | 4.78124700  | 0.50871700  | 1.06973700  |
| O  | -0.27412500 | -0.12658900 | 1.77594600  |
| S  | -0.21488200 | 0.21521600  | -1.48252600 |

## TS27

|    |             |             |             |
|----|-------------|-------------|-------------|
| C  | 1.48226300  | 0.15848300  | -0.61714100 |
| C  | 2.42265300  | -0.65959300 | 0.00088600  |
| C  | 3.52112900  | -0.10577500 | 0.63065600  |
| C  | 3.68631100  | 1.26707200  | 0.64631400  |
| C  | 2.76387500  | 2.08915700  | 0.02476100  |
| C  | 1.67180300  | 1.53312600  | -0.61478200 |
| Cl | 2.24512800  | -2.37017000 | 0.01423300  |
| H  | 4.23526100  | -0.75484200 | 1.11045400  |
| H  | 0.94854200  | 2.16090100  | -1.10950400 |
| C  | -1.27397700 | -0.40058100 | -0.50492200 |
| C  | -2.48266700 | -0.74573600 | -1.21408000 |
| C  | -3.57083000 | -1.19622800 | -0.55717700 |
| C  | -3.56343300 | -1.36129600 | 0.86795600  |
| C  | -2.45602000 | -1.13112700 | 1.59066900  |

|      |             |             |             |
|------|-------------|-------------|-------------|
| C    | -1.19454900 | -0.76831600 | 0.95341500  |
| Cl   | -1.71696100 | 1.68127000  | -0.13495700 |
| H    | -2.49926100 | -0.59808100 | -2.28306000 |
| H    | -2.42177300 | -1.26278600 | 2.66011500  |
| O    | -1.66457800 | 3.64253800  | 0.46579900  |
| H    | -1.32615900 | 3.49930800  | 1.35635900  |
| H    | -4.47157500 | -1.67966700 | 1.35659200  |
| H    | 2.89365100  | 3.15965200  | 0.02781600  |
| H    | 4.54490300  | 1.69096800  | 1.14351200  |
| H    | -4.46920200 | -1.42520400 | -1.10796400 |
| O    | -0.14842800 | -0.76185400 | 1.55840100  |
| S    | 0.12821700  | -0.51247200 | -1.53343300 |
| TS28 |             |             |             |
| C    | 1.51643500  | 0.07185900  | -0.63928800 |
| C    | 2.54086600  | -0.60663200 | 0.01350900  |
| C    | 3.56102500  | 0.09509700  | 0.62773300  |
| C    | 3.56414500  | 1.47756600  | 0.59281400  |
| C    | 2.55828500  | 2.16200900  | -0.06511900 |
| C    | 1.54531300  | 1.45862100  | -0.68950600 |
| Cl   | 2.56648700  | -2.32461900 | 0.08836000  |
| H    | 4.34136800  | -0.44792200 | 1.13535500  |
| H    | 0.76023800  | 1.98336900  | -1.21009800 |
| C    | -1.16379900 | -0.76839000 | -0.50386900 |
| C    | -2.32294900 | -1.28099400 | -1.20696900 |
| C    | -3.35259900 | -1.83016300 | -0.53856100 |
| C    | -3.33873700 | -1.94096100 | 0.89491300  |
| C    | -2.27021600 | -1.56768300 | 1.61328800  |
| C    | -1.04902300 | -1.09667900 | 0.96630900  |
| Cl   | -1.78903100 | 1.24161900  | -0.18994200 |
| H    | -2.34678300 | -1.17272600 | -2.28043300 |
| H    | -2.22946200 | -1.65865800 | 2.68667000  |
| H    | -0.99327600 | 3.41514100  | 1.41294200  |
| H    | -4.21127600 | -2.33862300 | 1.39029400  |
| H    | 2.56012800  | 3.23971100  | -0.10233000 |
| S    | -1.61981300 | 3.68167700  | 0.26315200  |
| H    | -4.21376700 | -2.18414900 | -1.08272200 |
| H    | 4.36196600  | 2.01737500  | 1.07886500  |
| O    | -0.00781600 | -0.97800300 | 1.56560900  |
| S    | 0.25007300  | -0.78545100 | -1.52677800 |
| TS29 |             |             |             |
| C    | 1.57446400  | 0.23983500  | -0.62660800 |

|    |             |             |             |
|----|-------------|-------------|-------------|
| C  | 2.66186500  | -0.30629200 | 0.04721700  |
| C  | 3.58610200  | 0.52023700  | 0.65661100  |
| C  | 3.42666100  | 1.89291300  | 0.59680800  |
| C  | 2.35484600  | 2.44506900  | -0.08034300 |
| C  | 1.43818900  | 1.61816200  | -0.70168300 |
| Cl | 2.87953300  | -2.00859900 | 0.15134400  |
| H  | 4.41935000  | 0.08173400  | 1.18084000  |
| H  | 0.60197000  | 2.03545300  | -1.23856300 |
| C  | -0.98037900 | -0.91634700 | -0.51984800 |
| C  | -2.05689400 | -1.60124600 | -1.19708300 |
| C  | -3.05441300 | -2.17987100 | -0.49912900 |
| C  | -3.08913400 | -2.13675900 | 0.93602100  |
| C  | -2.08289900 | -1.59809200 | 1.63969300  |
| C  | -0.87206000 | -1.11820100 | 0.97468200  |
| Cl | -1.92077000 | 1.02006400  | -0.34593200 |
| H  | -2.05839800 | -1.60002100 | -2.27624400 |
| H  | -2.07446400 | -1.56594600 | 2.71702400  |
| Cl | -2.43183800 | 3.27098100  | 0.34491100  |
| H  | -3.94585000 | -2.55061700 | 1.44495100  |
| H  | 2.22907600  | 3.51455900  | -0.13071900 |
| H  | -3.85840500 | -2.66722300 | -1.02749500 |
| H  | 4.14957100  | 2.53032400  | 1.08154300  |
| O  | 0.15491000  | -0.91848500 | 1.57154300  |
| S  | 0.43137900  | -0.77427500 | -1.51482600 |

TS30

|    |             |             |             |
|----|-------------|-------------|-------------|
| C  | 0.86615500  | 0.07965100  | -0.44020200 |
| C  | 0.84256400  | 1.40624800  | -0.96321800 |
| C  | 1.87547800  | 2.27620500  | -0.75330900 |
| C  | 3.01909300  | 1.84408300  | -0.08425300 |
| C  | 3.12000900  | 0.53293100  | 0.36213500  |
| C  | 2.08805900  | -0.34985700 | 0.15985000  |
| H  | 1.81097300  | 3.28832700  | -1.11955100 |
| C  | -1.43150900 | 0.29568800  | 0.69945000  |
| C  | -2.49850600 | 0.86993800  | 1.37860700  |
| C  | -3.78967500 | 0.66573200  | 0.91733400  |
| C  | -4.02762000 | -0.06606000 | -0.23255900 |
| C  | -2.96273700 | -0.61412000 | -0.93667900 |
| C  | -1.68173000 | -0.44181300 | -0.46060600 |
| H  | -2.30225000 | 1.44607300  | 2.26836100  |
| H  | 4.01087300  | 0.19183400  | 0.86369400  |
| Cl | 2.23929100  | -1.95478100 | 0.72778800  |
| H  | -0.04764300 | 1.71261000  | -1.49079100 |

|      |             |             |             |
|------|-------------|-------------|-------------|
| H    | -5.03397300 | -0.19752300 | -0.59685100 |
| H    | 3.84051700  | 2.52302800  | 0.08167400  |
| H    | -4.61582900 | 1.10302800  | 1.45658500  |
| S    | -0.22702900 | -1.11987700 | -1.17778400 |
| O    | -0.18519700 | 0.40706400  | 1.12220300  |
| H    | -3.13407700 | -1.16634900 | -1.84788900 |
| TS31 |             |             |             |
| C    | -0.78420100 | 0.12968600  | -0.35515100 |
| C    | -0.89961200 | 1.48347900  | -0.83114700 |
| C    | -2.08697100 | 2.15302400  | -0.75716200 |
| C    | -3.23720500 | 1.49583500  | -0.31747600 |
| C    | -3.19608400 | 0.13998800  | 0.00480200  |
| C    | -2.01956100 | -0.55308600 | -0.07286500 |
| H    | -2.13770100 | 3.18799200  | -1.05554300 |
| C    | 1.46346700  | -0.32519900 | -0.56635500 |
| C    | 2.52702500  | -0.62448700 | -1.38431000 |
| C    | 3.80632700  | -0.32247900 | -0.94022400 |
| C    | 3.99476200  | 0.27624100  | 0.29341900  |
| C    | 2.91073600  | 0.58048600  | 1.10332800  |
| C    | 1.62956200  | 0.27095400  | 0.67783400  |
| H    | 2.35095800  | -1.08802300 | -2.34160800 |
| H    | -4.09386100 | -0.38136700 | 0.29487900  |
| H    | 3.05938400  | 1.04678600  | 2.06431600  |
| Cl   | -1.95301100 | -2.22129500 | 0.27645900  |
| H    | 0.00392400  | 1.95584600  | -1.18484300 |
| H    | 4.65418200  | -0.55141500 | -1.56625800 |
| H    | -4.17457100 | 2.02502900  | -0.25709200 |
| H    | 4.99131800  | 0.51417800  | 0.63085200  |
| O    | 0.19041500  | -0.65394500 | -0.91980200 |
| S    | 0.14842300  | 0.50361900  | 1.55911000  |
| TS32 |             |             |             |
| C    | -0.97871100 | -0.29825600 | 0.54242200  |
| C    | -1.52957900 | 0.86621900  | -0.10310800 |
| C    | -2.84516700 | 0.89200300  | -0.49250400 |
| C    | -3.69702000 | -0.14616300 | -0.13721700 |
| C    | -3.23470500 | -1.20176500 | 0.65768500  |
| C    | -1.92800600 | -1.25095900 | 1.03933200  |
| Cl   | -0.48991700 | 2.17281600  | -0.45953700 |
| H    | -3.21064400 | 1.73791100  | -1.05160100 |
| C    | 1.44733900  | -0.68414300 | -0.51785900 |
| C    | 2.68671600  | -0.71205700 | -1.13699000 |



|      |             |             |             |
|------|-------------|-------------|-------------|
| C    | 3.79451500  | -0.19526400 | -0.48339700 |
| C    | 3.67069100  | 0.35603200  | 0.78042300  |
| C    | 2.43372600  | 0.40130100  | 1.40481900  |
| C    | 1.34615700  | -0.11906900 | 0.74497500  |
| H    | 2.78355900  | -1.14067900 | -2.12188200 |
| H    | -3.91994500 | -1.96586400 | 0.98828400  |
| H    | -1.53809700 | -2.03419300 | 1.66850300  |
| H    | 2.30572700  | 0.83424200  | 2.38374000  |
| H    | 4.53537000  | 0.75992800  | 1.28274600  |
| H    | -4.73091200 | -0.11022600 | -0.44106600 |
| H    | 4.75700800  | -0.22272200 | -0.96963000 |
| S    | -0.03925900 | -1.32263100 | -1.15506500 |
| O    | 0.12236700  | -0.13518100 | 1.34532300  |
| TS33 |             |             |             |
| C    | 1.73390600  | 0.24223800  | -0.15125500 |
| C    | 3.08071700  | -0.10311500 | -0.04915400 |
| C    | 4.02031000  | 0.81413400  | 0.38451100  |
| C    | 3.62967800  | 2.09436500  | 0.72845100  |
| C    | 2.30043600  | 2.45871000  | 0.61683300  |
| C    | 1.36514700  | 1.54621300  | 0.16574600  |
| Cl   | 3.62683100  | -1.68570600 | -0.47185900 |
| H    | 5.05258900  | 0.51140400  | 0.45383700  |
| H    | 0.34228200  | 1.85002200  | 0.01390600  |
| C    | -0.88807800 | -0.68149300 | 0.27523800  |
| C    | -1.43887800 | -1.94887100 | 0.77671800  |
| C    | -2.75292400 | -2.10550900 | 0.97107200  |
| C    | -3.68454300 | -1.06107900 | 0.63805900  |
| C    | -3.28166500 | 0.08464800  | 0.06622500  |
| C    | -1.87593200 | 0.30905000  | -0.29298600 |
| H    | -4.73470900 | -1.21178800 | 0.83513500  |
| H    | -0.49575300 | -0.11403300 | 1.24022800  |
| Cl   | -4.39127700 | 1.30494100  | -0.38966800 |
| H    | 1.98641300  | 3.46141800  | 0.86023000  |
| H    | -0.73516400 | -2.72473200 | 1.03392300  |
| H    | -0.05677900 | 0.47124000  | 2.18911400  |
| H    | -3.13858900 | -3.02373500 | 1.38449000  |
| H    | 4.36666800  | 2.80348800  | 1.07094900  |
| O    | -1.52163300 | 1.25185700  | -0.95733500 |
| S    | 0.58329000  | -0.96630500 | -0.72212000 |
| TS34 |             |             |             |
| C    | 1.73631700  | 0.19962700  | -0.31084500 |

|    |             |             |             |
|----|-------------|-------------|-------------|
| C  | 3.08352300  | -0.13718700 | -0.17714500 |
| C  | 4.01782000  | 0.80536400  | 0.21257300  |
| C  | 3.62495700  | 2.10353100  | 0.47651000  |
| C  | 2.29655000  | 2.46105600  | 0.32589900  |
| C  | 1.36633700  | 1.52227500  | -0.08217500 |
| Cl | 3.63589600  | -1.73958900 | -0.49757700 |
| H  | 5.04893600  | 0.50735900  | 0.31262500  |
| H  | 0.34340500  | 1.81251900  | -0.25899600 |
| C  | -0.88203700 | -0.71096700 | 0.17421600  |
| C  | -1.44702400 | -1.96468000 | 0.69875000  |
| C  | -2.76407000 | -2.10841200 | 0.88313500  |
| C  | -3.68908800 | -1.06943400 | 0.51473700  |
| C  | -3.27648800 | 0.05936400  | -0.08112900 |
| C  | -1.86629900 | 0.26356200  | -0.43894400 |
| H  | -4.74118400 | -1.21103800 | 0.70774600  |
| H  | -0.53138300 | -0.16243100 | 1.12974800  |
| Cl | -4.37394000 | 1.27429000  | -0.57517400 |
| O  | -0.15468200 | 0.52359600  | 2.43180200  |
| H  | 0.65159500  | 1.01147900  | 2.21201200  |
| H  | 1.98038300  | 3.47765700  | 0.50007800  |
| H  | -0.74988100 | -2.73245700 | 0.99430400  |
| H  | 4.35817300  | 2.83180100  | 0.78500600  |
| H  | -3.15723000 | -3.01139700 | 1.32223900  |
| O  | -1.50872300 | 1.16902500  | -1.14962100 |
| S  | 0.59051200  | -1.04368600 | -0.80618300 |

TS35

|    |             |             |             |
|----|-------------|-------------|-------------|
| C  | 1.79274200  | 0.07921600  | -0.13693100 |
| C  | 3.16959000  | -0.11104800 | -0.26081200 |
| C  | 4.05224500  | 0.94508300  | -0.16125500 |
| C  | 3.57279400  | 2.22068900  | 0.07040800  |
| C  | 2.21091300  | 2.42732200  | 0.18719900  |
| C  | 1.32725200  | 1.37131500  | 0.07231500  |
| Cl | 3.80284800  | -1.69313300 | -0.54393200 |
| H  | 5.10848600  | 0.75573400  | -0.26348300 |
| H  | 0.27214900  | 1.57260400  | 0.12080900  |
| C  | -0.84937300 | -0.88276300 | 0.19701100  |
| C  | -1.59863100 | -2.02072300 | 0.73033300  |
| C  | -2.94033200 | -2.02079600 | 0.71221200  |
| C  | -3.67688300 | -0.94741000 | 0.10532000  |
| C  | -3.05216400 | 0.03477800  | -0.56692800 |
| C  | -1.59387200 | 0.00501400  | -0.76636300 |
| H  | -4.75412500 | -0.94561400 | 0.16634400  |

|    |             |             |             |
|----|-------------|-------------|-------------|
| H  | -0.77697700 | -0.14163500 | 1.18788200  |
| Cl | -3.91065600 | 1.27684300  | -1.36325600 |
| H  | -2.27328500 | 0.45137900  | 2.61957700  |
| H  | 1.82177700  | 3.41892800  | 0.35469000  |
| H  | -1.04271400 | -2.80611200 | 1.21810000  |
| S  | -1.01603600 | 0.90860500  | 2.57253900  |
| H  | 4.26267600  | 3.04558800  | 0.15052100  |
| H  | -3.49018800 | -2.82894800 | 1.16734000  |
| S  | 0.79802400  | -1.36773600 | -0.23153400 |
| O  | -1.03657000 | 0.66213000  | -1.60633700 |

TS36

|    |             |             |             |
|----|-------------|-------------|-------------|
| C  | -1.68985500 | -0.01964100 | -0.28379800 |
| C  | -3.06180600 | 0.25877000  | -0.41317800 |
| C  | -3.99125600 | -0.74976600 | -0.38229000 |
| C  | -3.57795100 | -2.06984900 | -0.23176300 |
| C  | -2.23713300 | -2.36782100 | -0.13037200 |
| C  | -1.29281800 | -1.35700400 | -0.17055000 |
| Cl | -3.60270100 | 1.88421600  | -0.59876200 |
| H  | -5.03713500 | -0.50456600 | -0.46950200 |
| H  | -0.24968200 | -1.61130200 | -0.18165900 |
| C  | 0.92654500  | 0.72566900  | 0.35650000  |
| C  | 1.62010900  | 1.76874700  | 1.13116400  |
| C  | 2.95528800  | 1.81301800  | 1.17897000  |
| C  | 3.76087500  | 0.90024500  | 0.41252600  |
| C  | 3.21177100  | 0.01056600  | -0.42866800 |
| C  | 1.76137100  | -0.03662300 | -0.65274300 |
| H  | 4.83487500  | 0.94428100  | 0.50555600  |
| H  | 0.65108800  | -0.06804900 | 1.15430700  |
| Cl | 4.16247300  | -1.04050800 | -1.38273600 |
| H  | -1.90625500 | -3.38834600 | -0.03012800 |
| H  | 1.01536500  | 2.42651500  | 1.73547200  |
| Cl | 0.09437500  | -1.25356800 | 2.55732500  |
| H  | -4.31597800 | -2.85582800 | -0.20876100 |
| H  | 3.45359800  | 2.52930200  | 1.81211200  |
| S  | -0.62342000 | 1.34420200  | -0.24888100 |
| O  | 1.26219000  | -0.65868600 | -1.55489300 |

TS37

|   |            |             |             |
|---|------------|-------------|-------------|
| C | 1.73990700 | 0.74805500  | -0.35463600 |
| C | 1.58672300 | -0.28708800 | 0.60336600  |
| C | 2.46440400 | -1.39861000 | 0.54514800  |
| C | 3.43128600 | -1.45712500 | -0.40890900 |

|      |             |             |             |
|------|-------------|-------------|-------------|
| C    | 3.60147100  | -0.41124600 | -1.33425900 |
| C    | 2.75496600  | 0.66562800  | -1.30982200 |
| Cl   | 0.96479600  | 0.09419900  | 2.17631900  |
| H    | 2.34172200  | -2.17943500 | 1.27675200  |
| H    | 2.83663000  | 1.44975400  | -2.04661000 |
| C    | -0.90945100 | 1.24516400  | -0.11184500 |
| C    | -2.02807500 | 2.06775300  | -0.00341200 |
| C    | -3.29374300 | 1.53423500  | -0.02880900 |
| C    | -3.45644700 | 0.16193600  | -0.18745600 |
| C    | -2.36098600 | -0.65661400 | -0.28717000 |
| C    | -1.04127100 | -0.16249500 | -0.17329000 |
| H    | -4.44023700 | -0.27775800 | -0.22067500 |
| Cl   | -2.57231500 | -2.35602600 | -0.45750200 |
| H    | 4.37820500  | -0.46973200 | -2.07939500 |
| H    | -1.88882600 | 3.13533000  | 0.07680700  |
| H    | 4.09048500  | -2.31045400 | -0.44289800 |
| H    | -4.15628000 | 2.17493800  | 0.05444700  |
| O    | -0.06545400 | -1.00683800 | -0.10249700 |
| S    | 0.60981600  | 2.04284700  | -0.41948600 |
| TS38 |             |             |             |
| C    | 1.48045200  | -0.15877900 | 0.37172600  |
| C    | 2.76946600  | 0.07441300  | -0.08196800 |
| C    | 3.33267400  | 1.33366600  | 0.00129400  |
| C    | 2.61323700  | 2.39731500  | 0.55417500  |
| C    | 1.35403700  | 2.19086900  | 1.04355700  |
| C    | 0.75191800  | 0.91919200  | 0.94003100  |
| Cl   | 3.68057900  | -1.20835800 | -0.78335000 |
| H    | 4.33058600  | 1.48496500  | -0.37750600 |
| H    | -0.06032100 | 0.68444500  | 1.60952300  |
| C    | -0.99166600 | -1.23947500 | 0.19749400  |
| C    | -1.90799000 | -2.20399300 | 0.57153100  |
| C    | -3.26667800 | -1.93807800 | 0.50412100  |
| C    | -3.70615600 | -0.69437600 | 0.09623400  |
| C    | -2.78784100 | 0.28801000  | -0.22823200 |
| C    | -1.41147600 | 0.04223600  | -0.20541200 |
| H    | -4.75815800 | -0.46351900 | 0.05050700  |
| Cl   | -3.33493800 | 1.84816500  | -0.70145300 |
| H    | 0.79829800  | 2.98933900  | 1.50720600  |
| H    | -1.55886600 | -3.16858700 | 0.90670800  |
| H    | -3.97939600 | -2.69752800 | 0.78223400  |
| H    | 3.07185300  | 3.37144900  | 0.61026300  |
| O    | -0.55383500 | 0.98603700  | -0.51487600 |

|      |             |             |             |
|------|-------------|-------------|-------------|
| S    | 0.70818300  | -1.68947400 | 0.10527500  |
| TS39 |             |             |             |
| C    | -1.40196900 | -0.02961700 | -0.24902900 |
| C    | -2.70644500 | 0.14700400  | 0.18106300  |
| C    | -3.19046700 | 1.39869400  | 0.52255300  |
| C    | -2.34508400 | 2.49721800  | 0.47843600  |
| C    | -1.04419600 | 2.36109500  | 0.05421600  |
| C    | -0.61096700 | 1.12044200  | -0.42994700 |
| Cl   | -3.75926900 | -1.21174700 | 0.29940300  |
| H    | -4.21252300 | 1.49628200  | 0.84865100  |
| H    | -1.08787300 | 1.37747600  | -2.08457500 |
| C    | 0.88900700  | -1.31287500 | -0.18871300 |
| C    | 1.65733900  | -2.36679400 | 0.27570200  |
| C    | 2.97526800  | -2.15252600 | 0.63304000  |
| C    | 3.51984200  | -0.88392000 | 0.55754300  |
| C    | 2.74212200  | 0.17322700  | 0.12212900  |
| C    | 1.42629200  | -0.03763400 | -0.26202000 |
| H    | 4.54293300  | -0.69909000 | 0.84096500  |
| Cl   | 3.40730200  | 1.75592500  | 0.03494200  |
| H    | -0.35945900 | 3.19167200  | 0.01173600  |
| H    | 1.21969500  | -3.34996600 | 0.34829200  |
| H    | 3.57971700  | -2.97426200 | 0.98196100  |
| H    | -2.71037200 | 3.46211100  | 0.79161900  |
| O    | 0.71947200  | 1.01088400  | -0.74626000 |
| S    | -0.76305600 | -1.58301300 | -0.72639100 |
| TS40 |             |             |             |
| C    | -1.44685600 | -0.47703700 | -0.48060000 |
| C    | -1.77691100 | -0.04211100 | 0.84197900  |
| C    | -2.82632800 | 0.82117100  | 1.06623500  |
| C    | -3.65311900 | 1.18751400  | 0.01988900  |
| C    | -3.43266800 | 0.68324400  | -1.26715400 |
| C    | -2.37872200 | -0.14595000 | -1.50904700 |
| Cl   | -0.79522800 | -0.52785900 | 2.15069100  |
| H    | -3.00364900 | 1.18513300  | 2.06498000  |
| C    | 1.05185400  | 0.14398200  | -0.46349600 |
| C    | 2.22992600  | 0.82124500  | -0.15447100 |
| C    | 3.39412000  | 0.12106300  | 0.11089200  |
| C    | 3.38871500  | -1.26100700 | 0.11894700  |
| C    | 2.21616500  | -1.95926400 | -0.13737000 |
| C    | 1.07221400  | -1.25422400 | -0.43069700 |
| H    | -4.10086400 | 0.95018200  | -2.07039000 |

|      |             |             |             |
|------|-------------|-------------|-------------|
| H    | -2.18488600 | -0.53382200 | -2.49557700 |
| H    | 4.29597700  | 0.67195400  | 0.32364100  |
| H    | 2.19757400  | -3.03677100 | -0.09210800 |
| Cl   | 2.23048200  | 2.54081200  | -0.16327800 |
| H    | -4.48061700 | 1.85382600  | 0.20497800  |
| H    | 4.29470700  | -1.79823500 | 0.34898900  |
| O    | -0.05598700 | 0.76181900  | -0.79526700 |
| S    | -0.50000000 | -1.96492400 | -0.74994000 |
| TS41 |             |             |             |
| C    | 1.05063900  | 0.03198400  | 0.27473800  |
| C    | 1.18985700  | -0.49192000 | 1.60783400  |
| C    | 2.42318500  | -0.74846800 | 2.13292100  |
| C    | 3.57372100  | -0.40229600 | 1.42230900  |
| C    | 3.47641900  | 0.25037800  | 0.19453900  |
| C    | 2.25063400  | 0.52825800  | -0.34580500 |
| H    | 2.50690300  | -1.20370200 | 3.10673100  |
| C    | -1.10283700 | -1.29455900 | -0.44662800 |
| C    | -2.24160800 | -2.07202800 | -0.56725400 |
| C    | -3.48061900 | -1.50965300 | -0.30182200 |
| C    | -3.59223400 | -0.18981100 | 0.09307600  |
| C    | -2.45173700 | 0.58706900  | 0.22573500  |
| C    | -1.22043900 | 0.03231300  | -0.04864100 |
| H    | -2.16015900 | -3.10262400 | -0.87238500 |
| H    | 4.36369500  | 0.56476600  | -0.33058900 |
| Cl   | 2.10521300  | 1.35887100  | -1.82719600 |
| H    | 0.28063500  | -0.72636600 | 2.13982000  |
| H    | -4.55284000 | 0.24778900  | 0.30938900  |
| Cl   | -2.55936300 | 2.22894800  | 0.72341900  |
| H    | 4.54827300  | -0.60638400 | 1.83572600  |
| H    | -4.37062200 | -2.11109900 | -0.39790000 |
| O    | -0.08202100 | 0.76336400  | 0.00652400  |
| S    | 0.53193400  | -1.78061300 | -0.78279900 |
| TS42 |             |             |             |
| C    | 1.13079000  | 0.12552800  | 0.25739800  |
| C    | 2.29854500  | 0.74656100  | -0.13987100 |
| C    | 3.52130100  | 0.15151900  | 0.11703800  |
| C    | 3.58312400  | -1.07190800 | 0.79383000  |
| C    | 2.44195800  | -1.69535700 | 1.20691800  |
| C    | 1.16130800  | -1.15542100 | 0.88414000  |
| Cl   | 2.22367900  | 2.25176800  | -0.96209800 |
| H    | 4.42088400  | 0.64869500  | -0.20642300 |

|    |             |             |             |
|----|-------------|-------------|-------------|
| H  | 0.34330600  | -1.37848900 | 1.55636800  |
| C  | -1.19374400 | 0.01027100  | -0.04376100 |
| C  | -2.36416500 | 0.71058200  | 0.22127900  |
| C  | -3.59264000 | 0.09320900  | 0.10512600  |
| C  | -3.65248500 | -1.23862000 | -0.26528100 |
| C  | -2.49311600 | -1.94775800 | -0.50581200 |
| C  | -1.24814700 | -1.33460800 | -0.41149400 |
| H  | -2.53500600 | -2.99198100 | -0.77225400 |
| H  | -4.60940000 | -1.72846100 | -0.35005600 |
| H  | 2.48274600  | -2.62066500 | 1.75822500  |
| S  | 0.21515800  | -2.23061000 | -0.73867500 |
| H  | 4.54714700  | -1.50346000 | 1.01118100  |
| H  | -4.48679300 | 0.65786500  | 0.31143300  |
| O  | -0.03760700 | 0.72156200  | -0.00842600 |
| Cl | -2.27432200 | 2.36410300  | 0.68331300  |

TS43

|    |             |             |             |
|----|-------------|-------------|-------------|
| C  | 1.18484200  | -0.02516700 | 0.19545100  |
| C  | 2.24512600  | 0.82363100  | -0.08509600 |
| C  | 3.49221300  | 0.30336800  | -0.37936900 |
| C  | 3.67616700  | -1.06610500 | -0.41304500 |
| C  | 2.61849300  | -1.91838100 | -0.15541500 |
| C  | 1.37688200  | -1.39855700 | 0.16627200  |
| Cl | 2.00354600  | 2.52290800  | -0.05258500 |
| H  | 4.30470600  | 0.97986200  | -0.58756900 |
| H  | -0.59044700 | -1.33352200 | -1.72570900 |
| C  | -1.25278800 | -1.41771000 | -0.06923900 |
| C  | -2.50609500 | -1.98014300 | -0.34604800 |
| C  | -3.60074100 | -1.16419900 | -0.52402600 |
| C  | -3.48466500 | 0.20900300  | -0.37829700 |
| C  | -2.26471100 | 0.76952000  | -0.03121800 |
| C  | -1.16221600 | -0.03706100 | 0.16773900  |
| H  | -2.58540700 | -3.04998900 | -0.45468500 |
| H  | 2.74967600  | -2.98803300 | -0.19734400 |
| H  | -4.33420500 | 0.85629100  | -0.52015800 |
| Cl | -2.12605500 | 2.46660200  | 0.18526500  |
| H  | -4.55772900 | -1.59508200 | -0.77083800 |
| H  | 4.64711000  | -1.46942700 | -0.65181400 |
| O  | -0.00036900 | 0.53586700  | 0.54885100  |
| S  | 0.03230400  | -2.44361900 | 0.58596800  |

TS44

|   |            |             |             |
|---|------------|-------------|-------------|
| C | 1.21035400 | -0.18176500 | -0.51155900 |
|---|------------|-------------|-------------|

|    |             |             |             |
|----|-------------|-------------|-------------|
| C  | 2.10738500  | -0.26832800 | -1.62585600 |
| C  | 3.45627400  | -0.26289900 | -1.43887900 |
| C  | 3.98754000  | -0.29208300 | -0.14357000 |
| C  | 3.14865300  | -0.38819700 | 0.95960000  |
| C  | 1.78739800  | -0.41038400 | 0.78923600  |
| H  | 4.11694700  | -0.26174200 | -2.29096000 |
| C  | -0.92512000 | 1.39709500  | -0.15209900 |
| C  | -2.01140500 | 2.17756700  | 0.20666400  |
| C  | -3.26318200 | 1.59418000  | 0.32430400  |
| C  | -3.44007500 | 0.24260100  | 0.09696200  |
| C  | -2.35251600 | -0.54107300 | -0.25165900 |
| C  | -1.10831000 | 0.03965300  | -0.37288800 |
| H  | -1.87892000 | 3.23217000  | 0.38616600  |
| H  | 3.55430000  | -0.47393600 | 1.95453300  |
| Cl | 0.74268900  | -0.60924600 | 2.12358900  |
| H  | 1.65853000  | -0.27257600 | -2.60550800 |
| H  | -4.41013600 | -0.21686200 | 0.19062200  |
| Cl | -2.53861000 | -2.22631400 | -0.53708600 |
| H  | 5.05568600  | -0.28611600 | 0.00313800  |
| H  | -4.11016600 | 2.20213200  | 0.60016400  |
| O  | -0.03958400 | -0.69384600 | -0.76568100 |
| S  | 0.70494400  | 1.94962700  | -0.39780000 |

TS45

|    |             |             |             |
|----|-------------|-------------|-------------|
| C  | -1.22290700 | 0.86431000  | -0.26492700 |
| C  | -2.16091700 | 1.64194700  | -0.91115000 |
| C  | -3.50421600 | 1.35193500  | -0.79427500 |
| C  | -3.92492300 | 0.25025000  | -0.03704100 |
| C  | -3.01475300 | -0.51043300 | 0.63357300  |
| C  | -1.61435700 | -0.26387100 | 0.51758100  |
| H  | -4.22913300 | 1.96950500  | -1.29965600 |
| C  | 0.82751700  | -1.19391600 | -0.63033500 |
| C  | 1.88879700  | -2.08882200 | -0.55074900 |
| C  | 3.16426100  | -1.64499700 | -0.26287200 |
| C  | 3.39988300  | -0.30608400 | -0.00553000 |
| C  | 2.35075000  | 0.59055700  | -0.05425600 |
| C  | 1.07682000  | 0.15199400  | -0.37422700 |
| H  | 1.69611400  | -3.13764700 | -0.71117500 |
| H  | -3.32034700 | -1.32443300 | 1.27048600  |
| Cl | -0.70041800 | -0.61019500 | 1.96822700  |
| H  | -1.80443900 | 2.45247600  | -1.52577400 |
| H  | 4.38636700  | 0.05196900  | 0.23892500  |
| Cl | 2.62257600  | 2.25771600  | 0.26444500  |



|      |             |             |             |
|------|-------------|-------------|-------------|
| H    | -4.97567300 | 0.02493400  | 0.05086600  |
| H    | 3.97933600  | -2.34934700 | -0.21442500 |
| S    | -0.79480300 | -1.73912900 | -0.94793500 |
| O    | 0.08902500  | 1.13419200  | -0.52405700 |
| TS46 |             |             |             |
| C    | -2.58352700 | 2.24080000  | -0.21590300 |
| C    | -3.21364700 | 1.00509600  | 0.10945700  |
| C    | -2.59189900 | -0.17133300 | -0.12896700 |
| C    | -1.28200600 | -0.20873800 | -0.74659600 |
| C    | -0.57629600 | 1.05252100  | -0.83659900 |
| C    | -1.32324400 | 2.26986800  | -0.69987500 |
| H    | -4.20764600 | 1.00634300  | 0.52827500  |
| H    | 0.27968700  | 1.04248600  | -1.49744500 |
| Cl   | -3.34684600 | -1.66825100 | 0.20631400  |
| H    | 0.64380800  | 3.05514800  | 1.25537300  |
| C    | 1.16751200  | 2.19164600  | 0.87708500  |
| C    | 2.41928300  | 2.29155700  | 0.38447500  |
| C    | 0.49020700  | 0.92418100  | 0.85282700  |
| C    | 3.09260000  | 1.14578900  | -0.11937800 |
| C    | 1.25602700  | -0.27570200 | 0.60624100  |
| C    | 2.53646100  | -0.08689700 | -0.01844500 |
| H    | -0.84765500 | 3.20600300  | -0.94671700 |
| H    | 4.07269000  | 1.24978500  | -0.55639200 |
| S    | 0.55747400  | -1.74296200 | 0.86803300  |
| H    | 2.93038900  | 3.24163700  | 0.37061500  |
| H    | -3.13917400 | 3.15514800  | -0.07850700 |
| O    | -0.72921100 | -1.26818100 | -1.07136600 |
| H    | -0.35409600 | 0.79789400  | 1.51662400  |
| Cl   | 3.41668700  | -1.44906400 | -0.57663000 |
| TS47 |             |             |             |
| C    | 2.37129000  | 2.32245000  | 0.25075100  |
| C    | 3.16613500  | 1.23055600  | -0.22129500 |
| C    | 2.69425900  | -0.03613200 | -0.25412300 |
| C    | 1.34927100  | -0.34757600 | 0.16561800  |
| C    | 0.71005200  | 0.70556500  | 1.01842700  |
| C    | 1.17679800  | 2.08578100  | 0.80318800  |
| H    | 4.15371600  | 1.42629600  | -0.60899000 |
| H    | 1.15683100  | 0.44564800  | 2.05557700  |
| Cl   | 3.66872100  | -1.27665800 | -0.93194600 |
| H    | -4.16581900 | -1.32526000 | 0.53297400  |
| C    | -3.21418000 | -0.83486300 | 0.67121400  |

|      |             |             |             |
|------|-------------|-------------|-------------|
| C    | -2.42925100 | -1.15697500 | 1.83314300  |
| C    | -2.77779500 | 0.01329900  | -0.27464600 |
| C    | -1.25056500 | -0.56745500 | 2.04334900  |
| C    | -1.47659400 | 0.67525100  | -0.16288500 |
| Cl   | -3.67438800 | 0.31436200  | -1.70294800 |
| C    | -0.79223900 | 0.55629100  | 1.18527600  |
| H    | -1.13405400 | 1.46112200  | 1.70981700  |
| H    | -0.64198600 | -0.82613500 | 2.89813400  |
| H    | 0.56212000  | 2.89168100  | 1.17418000  |
| S    | 0.58442900  | -1.74312200 | -0.18215900 |
| H    | 1.63015400  | 0.10300300  | 3.26756500  |
| O    | -0.99155700 | 1.34855000  | -1.03915300 |
| H    | -2.79314600 | -1.91966100 | 2.50252700  |
| H    | 2.74702100  | 3.32673200  | 0.14108700  |
|      |             |             |             |
| TS48 |             |             |             |
| C    | 1.49583600  | -1.17363900 | 2.15490300  |
| C    | 2.78089700  | -0.80719600 | 1.64477900  |
| C    | 2.92908900  | -0.16106400 | 0.46701100  |
| C    | 1.79706600  | 0.22480700  | -0.34269100 |
| C    | 0.48421000  | -0.37722000 | 0.07107300  |
| C    | 0.39844200  | -0.94653700 | 1.42601200  |
| H    | 3.66163000  | -1.03518000 | 2.22445000  |
| H    | 0.47385400  | -1.30113500 | -0.60766700 |
| Cl   | 4.50779100  | 0.28320300  | -0.03869200 |
| H    | -4.11043700 | 2.02874300  | 0.95794600  |
| C    | -3.19009300 | 1.56596500  | 0.63545000  |
| C    | -1.94817300 | 2.27184500  | 0.82902200  |
| C    | -3.23515500 | 0.34298400  | 0.08395700  |
| C    | -0.79587700 | 1.75027300  | 0.40803400  |
| C    | -2.01148200 | -0.35843400 | -0.30520700 |
| Cl   | -4.70654000 | -0.51375400 | -0.09795000 |
| C    | -0.73883800 | 0.45469500  | -0.31487700 |
| H    | -0.59962700 | 0.71873200  | -1.37405100 |
| O    | 0.37727700  | -2.48943100 | -1.61787600 |
| H    | -0.58655900 | -2.57139800 | -1.53692900 |
| H    | 0.13430200  | 2.28476800  | 0.52777200  |
| H    | -0.57571600 | -1.24831800 | 1.78059800  |
| S    | 1.93129000  | 1.17798100  | -1.66335800 |
| H    | -1.97647900 | 3.23405000  | 1.31468400  |
| H    | 1.43456400  | -1.64038300 | 3.12482200  |
| O    | -2.02389800 | -1.52520400 | -0.63459500 |

## TS49

|    |             |             |             |
|----|-------------|-------------|-------------|
| C  | 1.55450900  | -0.25868100 | 2.52131600  |
| C  | 2.80993700  | -0.06686400 | 1.87703800  |
| C  | 2.90015500  | 0.21602300  | 0.55469000  |
| C  | 1.73340700  | 0.35381200  | -0.27749000 |
| C  | 0.45166800  | -0.09897200 | 0.34880300  |
| C  | 0.42058900  | -0.24624300 | 1.80329000  |
| H  | 3.71718400  | -0.12588400 | 2.45732900  |
| H  | 0.42861200  | -1.21953900 | -0.01444300 |
| Cl | 4.45274600  | 0.49218300  | -0.12414800 |
| H  | -4.31262900 | 2.22665600  | -0.11164000 |
| C  | -3.35597300 | 1.72705100  | -0.09296600 |
| C  | -2.15125100 | 2.52254600  | -0.09322500 |
| C  | -3.31932300 | 0.38796500  | -0.03091700 |
| C  | -0.95041500 | 1.94594200  | -0.14336700 |
| C  | -2.04123600 | -0.32197800 | 0.11167500  |
| Cl | -4.74195000 | -0.55893900 | 0.06380300  |
| C  | -0.81520100 | 0.47093200  | -0.27511600 |
| H  | -0.73114400 | 0.28830100  | -1.35841100 |
| H  | -0.04692600 | 2.53588400  | -0.16994600 |
| H  | -0.53327100 | -0.43966200 | 2.26627600  |
| S  | 1.80004300  | 0.84275700  | -1.84067900 |
| S  | 0.56385700  | -2.78550000 | -1.01573400 |
| H  | 1.66652600  | -2.24835700 | -1.55627200 |
| O  | -1.97519300 | -1.46978900 | 0.48330400  |
| H  | -2.24784100 | 3.59601200  | -0.05948800 |
| H  | 1.53390300  | -0.42554300 | 3.58624200  |

## TS50

|    |             |             |             |
|----|-------------|-------------|-------------|
| C  | 2.80342600  | 1.92404300  | 0.99226500  |
| C  | 3.54005600  | 0.89539600  | 0.35862900  |
| C  | 2.92647800  | -0.18347300 | -0.18871100 |
| C  | 1.50057400  | -0.35540600 | -0.12947400 |
| C  | 0.74329800  | 0.73391000  | 0.49213400  |
| C  | 1.45167700  | 1.85744400  | 1.01961100  |
| H  | 4.61651600  | 0.95748600  | 0.31255400  |
| H  | 0.25131200  | -0.31563900 | 1.38690500  |
| Cl | 3.83343900  | -1.42251000 | -0.95759000 |
| H  | -4.29083100 | 1.20846800  | -1.21321600 |
| C  | -3.27291400 | 1.13528300  | -0.86715300 |
| C  | -2.37452300 | 2.17476300  | -1.07422000 |
| C  | -2.85940100 | -0.00240900 | -0.21154700 |
| C  | -1.06384300 | 2.08365300  | -0.64640000 |

|      |             |             |             |
|------|-------------|-------------|-------------|
| C    | -1.54600000 | -0.10075000 | 0.25087700  |
| Cl   | -3.96816300 | -1.28586400 | 0.06024700  |
| C    | -0.63345200 | 0.94407000  | 0.01542100  |
| H    | 0.87215500  | 2.65826700  | 1.45534500  |
| H    | -0.36731800 | 2.88312300  | -0.84388200 |
| H    | 3.32837100  | 2.75846100  | 1.42776200  |
| H    | -2.70887500 | 3.06017900  | -1.59191900 |
| S    | -0.89109000 | -1.40827200 | 1.13184700  |
| O    | 0.94426900  | -1.40934900 | -0.48210900 |
| TS51 |             |             |             |
| C    | 2.12915900  | -1.58591100 | 1.60226300  |
| C    | 3.24728600  | -1.03814000 | 0.92546600  |
| C    | 3.12433200  | 0.05327200  | 0.12648800  |
| C    | 1.85678300  | 0.75606400  | -0.07190400 |
| C    | 0.70607500  | -0.00879800 | 0.42111400  |
| C    | 0.90148700  | -1.04748500 | 1.38460100  |
| H    | 4.22772100  | -1.46456700 | 1.07644300  |
| H    | 0.98590000  | -0.91085300 | -0.75074500 |
| Cl   | 4.51142200  | 0.75207400  | -0.60782700 |
| H    | -4.11682300 | 2.30086300  | 0.20885100  |
| C    | -3.15099700 | 1.82355100  | 0.21172300  |
| C    | -1.98497100 | 2.56640000  | 0.37239500  |
| C    | -3.06545800 | 0.46843400  | 0.03665600  |
| C    | -0.75208800 | 1.95342500  | 0.38294600  |
| C    | -1.80991900 | -0.20535500 | 0.00974500  |
| C    | -0.63294200 | 0.57460500  | 0.24726800  |
| H    | 0.15193400  | 2.53030700  | 0.50195800  |
| H    | 0.04054700  | -1.42267700 | 1.91746700  |
| O    | 1.01897500  | -1.77941700 | -1.51819200 |
| H    | 1.65083900  | -2.41120700 | -1.15990000 |
| H    | 0.09902200  | -2.09651600 | -1.30260000 |
| S    | -1.78771700 | -1.86442100 | -0.37223400 |
| Cl   | -4.53223700 | -0.39664100 | -0.19733600 |
| H    | -2.05352800 | 3.63396800  | 0.51102700  |
| H    | 2.26963800  | -2.38694100 | 2.30887300  |
| O    | 1.76722500  | 1.79886900  | -0.67686100 |
| TS52 |             |             |             |
| C    | 3.17641700  | 1.82016100  | 0.42214300  |
| C    | 3.55601300  | 0.53039100  | 0.03907400  |
| C    | 2.62022600  | -0.42621400 | -0.27013900 |
| C    | 1.25034300  | -0.10526900 | -0.23589600 |

|    |             |             |             |
|----|-------------|-------------|-------------|
| C  | 0.88767500  | 1.20008900  | 0.19124200  |
| C  | 1.84474300  | 2.15975600  | 0.49508500  |
| H  | 4.60125500  | 0.26943900  | -0.01489200 |
| H  | 0.16421300  | -0.27437400 | 2.15575100  |
| Cl | 3.09208600  | -2.00514200 | -0.75332600 |
| H  | -4.07829000 | 0.72962800  | -1.32308000 |
| C  | -3.09984900 | 0.88925300  | -0.89940700 |
| C  | -2.52107200 | 2.16365000  | -0.92308700 |
| C  | -2.45521600 | -0.16116900 | -0.31132900 |
| C  | -1.24141400 | 2.35783400  | -0.44248100 |
| C  | -1.18863400 | 0.02229600  | 0.31909100  |
| Cl | -3.21750100 | -1.69540000 | -0.22133700 |
| C  | -0.54032700 | 1.29969000  | 0.10448500  |
| H  | 1.54237200  | 3.14696800  | 0.81018600  |
| H  | -0.73783600 | 3.30025700  | -0.59210800 |
| S  | -1.02596200 | -0.81368500 | 1.86912900  |
| H  | -3.05690800 | 2.97669100  | -1.38569700 |
| H  | 3.93779800  | 2.54055000  | 0.67377000  |
| O  | 0.30517700  | -0.90797500 | -0.57417700 |

TS53

|    |             |             |             |
|----|-------------|-------------|-------------|
| C  | 3.19271600  | 1.88615700  | -0.16325200 |
| C  | 3.52545200  | 0.53440200  | -0.16621800 |
| C  | 2.54411300  | -0.44068400 | -0.15871800 |
| C  | 1.23026000  | -0.02479900 | -0.14685100 |
| C  | 0.88463600  | 1.32570500  | -0.14039400 |
| C  | 1.87547000  | 2.29769200  | -0.15305600 |
| H  | 4.55908400  | 0.22818300  | -0.17339600 |
| H  | -2.03120500 | 0.82063300  | 2.16584600  |
| Cl | 2.93323400  | -2.11064500 | -0.16981500 |
| H  | -4.16977500 | 0.27973800  | -0.92967300 |
| C  | -3.16131500 | 0.56114200  | -0.67402200 |
| C  | -2.81159300 | 1.91794600  | -0.58530800 |
| C  | -2.23017800 | -0.41753600 | -0.46424600 |
| C  | -1.50067200 | 2.31965300  | -0.37257900 |
| C  | -0.93892600 | -0.02795600 | 0.01750500  |
| Cl | -2.59161300 | -2.07413100 | -0.62205100 |
| C  | -0.54671300 | 1.34789600  | -0.16749300 |
| H  | 1.62264500  | 3.34592500  | -0.14849100 |
| H  | -1.22896400 | 3.36168200  | -0.42744800 |
| S  | -1.16161400 | -0.19512300 | 2.14145300  |
| H  | 3.98539400  | 2.61696700  | -0.16646900 |
| H  | -3.57601800 | 2.65943800  | -0.75507500 |

|      |             |             |             |
|------|-------------|-------------|-------------|
| O    | 0.15470000  | -0.84088700 | -0.16487700 |
| TS54 |             |             |             |
| C    | -2.50828400 | -1.14926800 | 1.79725200  |
| C    | -3.24621700 | -0.82697000 | 0.60874900  |
| C    | -2.74877600 | -0.01591700 | -0.34259100 |
| C    | -1.42335300 | 0.58635800  | -0.20392400 |
| C    | -0.80071100 | 0.46849800  | 1.15895100  |
| C    | -1.31266800 | -0.59355200 | 2.03174500  |
| H    | -4.21294600 | -1.28154900 | 0.45460200  |
| H    | -1.22552500 | 1.45356300  | 1.66697400  |
| Cl   | -3.58904100 | 0.29235100  | -1.80154100 |
| H    | 4.08271300  | 1.51954400  | -0.63270600 |
| C    | 3.11629300  | 1.28528100  | -0.21390400 |
| C    | 2.28410000  | 2.35249100  | 0.25918500  |
| C    | 2.70960900  | -0.00179500 | -0.20840400 |
| C    | 1.11583500  | 2.07661400  | 0.83848200  |
| C    | 1.39360500  | -0.37698200 | 0.25311600  |
| Cl   | 3.73075300  | -1.20577600 | -0.88615700 |
| C    | 0.70202200  | 0.67168100  | 1.09862800  |
| H    | 1.08639200  | 0.46044900  | 2.10955100  |
| H    | 0.47312000  | 2.86347500  | 1.20312900  |
| H    | -0.74197400 | -0.84871400 | 2.91255600  |
| H    | -1.62891300 | 2.48268300  | 2.14790900  |
| H    | 2.61371400  | 3.36938900  | 0.12159500  |
| H    | -2.91930300 | -1.88047800 | 2.47438000  |
| S    | 0.70930300  | -1.82331900 | -0.03780100 |
| O    | -0.87174700 | 1.21304000  | -1.07825200 |
| TS55 |             |             |             |
| C    | -1.44407700 | -0.41136800 | 2.23018000  |
| C    | -2.78934000 | -0.35977200 | 1.72110000  |
| C    | -3.04683000 | -0.17147100 | 0.41658200  |
| C    | -1.95440400 | -0.06382800 | -0.55616300 |
| C    | -0.59180800 | 0.19853800  | 0.03213200  |
| C    | -0.39281200 | -0.19135500 | 1.43097500  |
| H    | -3.61251500 | -0.50218300 | 2.40421700  |
| H    | -0.65841700 | 1.36450200  | 0.07728200  |
| Cl   | -4.63813400 | -0.18940900 | -0.20710800 |
| H    | 3.34958200  | -2.61025200 | 0.18330900  |
| C    | 2.59473100  | -1.92139100 | -0.16354100 |
| C    | 1.42838500  | -2.43859700 | -0.81847900 |
| C    | 2.80262600  | -0.59735400 | 0.00742700  |

|      |             |             |             |
|------|-------------|-------------|-------------|
| C    | 0.46521800  | -1.60691200 | -1.21852200 |
| C    | 1.85904700  | 0.38504200  | -0.46374700 |
| Cl   | 4.25866700  | -0.07594800 | 0.75598700  |
| C    | 0.53511100  | -0.14445300 | -0.96096200 |
| H    | 0.27860500  | 0.38269600  | -1.87957400 |
| O    | -0.95020500 | 2.80033700  | -0.11054900 |
| H    | -0.08447000 | 3.05507700  | -0.46675400 |
| H    | -0.42358600 | -1.96276800 | -1.71593900 |
| H    | 0.61452400  | -0.21144500 | 1.81983900  |
| H    | 1.35494300  | -3.50171100 | -0.98222000 |
| H    | -1.30234500 | -0.63001400 | 3.27656100  |
| O    | -2.12066300 | -0.14100700 | -1.74952300 |
| S    | 2.16915500  | 1.98687800  | -0.44431200 |
| TS56 |             |             |             |
| C    | -1.29220600 | -0.45922300 | 2.24637200  |
| C    | -2.64080900 | -0.49546000 | 1.76884300  |
| C    | -2.92373800 | -0.45712700 | 0.45151700  |
| C    | -1.85082800 | -0.42259500 | -0.54668100 |
| C    | -0.49944600 | -0.06042500 | -0.00969700 |
| C    | -0.25854400 | -0.29396100 | 1.39890400  |
| H    | -3.44891400 | -0.58313800 | 2.47860800  |
| H    | -0.65152500 | 1.19161700  | -0.04640700 |
| Cl   | -4.52359300 | -0.57690900 | -0.13560900 |
| H    | 3.53293800  | -2.59518400 | 0.32559700  |
| C    | 2.76284800  | -1.95782900 | -0.08065000 |
| C    | 1.65918500  | -2.55593700 | -0.77990100 |
| C    | 2.89029300  | -0.62151700 | 0.05323700  |
| C    | 0.66492900  | -1.79676700 | -1.24125400 |
| C    | 1.92317700  | 0.29440000  | -0.50926700 |
| Cl   | 4.27264400  | 0.00991100  | 0.85390200  |
| C    | 0.63604700  | -0.32502200 | -1.00729400 |
| H    | 0.34628200  | 0.17787700  | -1.92893800 |
| H    | -0.17816200 | -2.21540800 | -1.76779800 |
| H    | 0.75407100  | -0.23960500 | 1.76796500  |
| S    | -1.16479900 | 2.81380100  | -0.19159600 |
| H    | -2.39078800 | 2.44637900  | 0.20619200  |
| H    | 1.65909400  | -3.62433500 | -0.92613700 |
| H    | -1.11972800 | -0.56130800 | 3.30573100  |
| O    | -2.03513500 | -0.61414500 | -1.72640200 |
| S    | 2.14095600  | 1.90269900  | -0.57586300 |

TS57

|    |             |             |             |
|----|-------------|-------------|-------------|
| C  | -2.65858400 | 2.12261200  | -0.90178500 |
| C  | -3.40619200 | 1.04038600  | -0.39779100 |
| C  | -2.81285700 | -0.09712400 | 0.06834900  |
| C  | -1.40549100 | -0.24452900 | 0.07875800  |
| C  | -0.61725500 | 0.89123400  | -0.39905800 |
| C  | -1.30683500 | 2.04872300  | -0.89319200 |
| H  | -4.48450800 | 1.08717700  | -0.40152900 |
| H  | -0.21753300 | 0.14654000  | -1.31740200 |
| Cl | -3.80215400 | -1.38511900 | 0.62995900  |
| H  | 4.45819400  | 0.77438400  | 1.12109400  |
| C  | 3.42500600  | 0.85706500  | 0.82314400  |
| C  | 2.64915200  | 1.91594500  | 1.27099600  |
| C  | 2.89007100  | -0.11359800 | -0.00224900 |
| C  | 1.30979700  | 2.01305800  | 0.91337900  |
| C  | 1.55767300  | -0.01185000 | -0.39703000 |
| Cl | 3.83895400  | -1.43684100 | -0.54191400 |
| C  | 0.77610200  | 1.04449800  | 0.09478100  |
| H  | -0.70273800 | 2.86493500  | -1.25973800 |
| H  | 0.69970500  | 2.82432700  | 1.28042100  |
| H  | -3.17063600 | 2.98739000  | -1.29107400 |
| H  | 3.09244500  | 2.66277700  | 1.91051800  |
| S  | -0.62827200 | -1.71625300 | 0.40858600  |
| O  | 0.91853600  | -0.83908800 | -1.20328000 |

TS58

|   |             |             |             |
|---|-------------|-------------|-------------|
| C | -1.78933100 | -2.01567900 | -1.45913500 |
| C | -2.97925600 | -1.39504400 | -1.01645500 |
| C | -2.95813500 | -0.24512200 | -0.29126400 |
| C | -1.73952200 | 0.42689800  | 0.08340400  |
| C | -0.52865000 | -0.28609800 | -0.30053700 |
| C | -0.60122100 | -1.45364800 | -1.14004100 |
| H | -3.93428100 | -1.83245600 | -1.26261800 |
| H | -0.54965800 | -0.99785100 | 0.89122800  |
| H | 4.33688800  | 1.97264900  | -0.70597300 |
| C | 3.36374800  | 1.52521500  | -0.58423200 |
| C | 2.20324800  | 2.24283000  | -0.90975500 |
| C | 3.25409400  | 0.25310700  | -0.11792300 |
| C | 0.94484700  | 1.69015600  | -0.76510300 |
| C | 1.96137300  | -0.36506800 | 0.07404200  |
| C | 0.78364600  | 0.39518400  | -0.31208500 |
| H | 0.07083300  | 2.26474900  | -1.02166400 |
| H | 0.32584800  | -1.89733600 | -1.47003300 |
| O | -0.29645300 | -1.66993400 | 1.90228200  |



|    |             |             |             |
|----|-------------|-------------|-------------|
| H  | -0.82886500 | -2.46623200 | 1.92951300  |
| H  | 0.62124800  | -1.88549400 | 1.60552400  |
| Cl | 4.63599300  | -0.66355700 | 0.29249500  |
| O  | 1.88002400  | -1.50220400 | 0.58421300  |
| S  | -1.72440700 | 1.80922200  | 1.00652000  |
| H  | -1.84046500 | -2.90945900 | -2.05932200 |
| H  | 2.30135100  | 3.24348400  | -1.30026300 |
| Cl | -4.46364000 | 0.44597600  | 0.16820100  |

TS59

|    |             |             |             |
|----|-------------|-------------|-------------|
| C  | 3.04931400  | 1.91737900  | 0.69290900  |
| C  | 3.53708500  | 0.67515000  | 0.33064200  |
| C  | 2.66783000  | -0.32396200 | -0.07716400 |
| C  | 1.30390600  | -0.09441100 | -0.12435900 |
| C  | 0.82700700  | 1.16918200  | 0.25044700  |
| C  | 1.68763600  | 2.17138300  | 0.64912200  |
| H  | 4.59498700  | 0.46901800  | 0.35848400  |
| H  | -1.27596500 | -1.27772900 | 1.85437600  |
| Cl | 3.29697800  | -1.85844600 | -0.54862000 |
| H  | -4.24547600 | 0.60715100  | -1.15512600 |
| C  | -3.23892700 | 0.78276300  | -0.81130900 |
| C  | -2.56197500 | 1.95162600  | -1.16109100 |
| C  | -2.63911000 | -0.13401900 | 0.00442900  |
| C  | -1.25342200 | 2.16393100  | -0.73828400 |
| C  | -1.30023100 | 0.04961100  | 0.48511200  |
| Cl | -3.46564300 | -1.55045100 | 0.51366400  |
| C  | -0.61757000 | 1.24834500  | 0.06084300  |
| H  | 1.29650600  | 3.13501900  | 0.93726400  |
| H  | -0.70281100 | 3.02246300  | -1.09038600 |
| H  | -3.04864500 | 2.67315000  | -1.79709500 |
| H  | 3.73497400  | 2.68559300  | 1.01292900  |
| S  | 0.10297100  | -1.24084400 | -0.67245300 |
| O  | -0.98788300 | -0.37147100 | 1.73316000  |

TS60

|   |             |             |             |
|---|-------------|-------------|-------------|
| C | 3.05150300  | 2.07160500  | -0.03414200 |
| C | 3.54902500  | 0.77348700  | -0.06037400 |
| C | 2.68228000  | -0.29977500 | -0.07990600 |
| C | 1.31464600  | -0.08221500 | -0.07320300 |
| C | 0.81671800  | 1.22544200  | -0.04532800 |
| C | 1.69322000  | 2.30396700  | -0.02944900 |
| H | 4.61152300  | 0.59165700  | -0.06494100 |
| H | -1.78915300 | 0.66976300  | 2.17000600  |

|    |             |             |             |
|----|-------------|-------------|-------------|
| Cl | 3.29039400  | -1.91043500 | -0.12043000 |
| H  | -4.41015900 | 0.61367800  | -0.52010400 |
| C  | -3.35637300 | 0.78124700  | -0.36916500 |
| C  | -2.83772300 | 2.07997100  | -0.36042400 |
| C  | -2.52157100 | -0.29146900 | -0.20302200 |
| C  | -1.48144600 | 2.31067400  | -0.22451100 |
| C  | -1.14727500 | -0.08037000 | 0.07824700  |
| Cl | -3.11987500 | -1.89309900 | -0.23889500 |
| C  | -0.61972300 | 1.23883300  | -0.07186100 |
| H  | 1.31298500  | 3.31334900  | -0.00705200 |
| H  | -1.09468000 | 3.31603100  | -0.27985800 |
| H  | 3.74215500  | 2.89943800  | -0.01604800 |
| H  | -3.51192400 | 2.91108400  | -0.49378700 |
| O  | -1.25154100 | -0.11013700 | 1.99098900  |
| S  | 0.08706600  | -1.31013800 | -0.11054900 |

TS61

|    |             |             |             |
|----|-------------|-------------|-------------|
| C  | -1.32111600 | 1.11508700  | 1.72010300  |
| C  | -2.65419600 | 1.12365900  | 1.91145400  |
| C  | -3.52244500 | 0.44695500  | 1.00183300  |
| C  | -3.07573000 | -0.18206000 | -0.11424200 |
| C  | -1.68245700 | -0.14257100 | -0.40861800 |
| C  | -0.75942000 | 0.32905400  | 0.63492300  |
| H  | -4.58515600 | 0.45830400  | 1.19199200  |
| C  | 0.54586100  | 0.63460200  | -0.05808800 |
| C  | 1.62836000  | -0.28801000 | 0.23966900  |
| C  | 0.82441900  | 1.95424800  | -0.53886500 |
| C  | 2.90571500  | 0.10929500  | -0.25679600 |
| C  | 2.07516500  | 2.28869800  | -0.93468600 |
| H  | 0.00594700  | 2.65183700  | -0.63930700 |
| C  | 3.11300800  | 1.34018200  | -0.80321900 |
| H  | 4.10912300  | 1.59498700  | -1.13072400 |
| H  | 0.04957800  | 0.03150100  | -1.12403500 |
| H  | -0.64951800 | 1.60094300  | 2.41085800  |
| Cl | -4.14137400 | -0.90114800 | -1.24519000 |
| Cl | 4.24219200  | -0.95783600 | -0.08852900 |
| H  | -0.44744200 | -0.68334200 | 1.12243900  |
| S  | 1.33356500  | -1.71164000 | 1.05585200  |
| O  | -1.14940800 | -0.49149700 | -1.47688800 |
| H  | -3.09105200 | 1.63323100  | 2.75472300  |
| H  | 2.28985700  | 3.25866400  | -1.35206100 |

TS62

|    |             |             |             |
|----|-------------|-------------|-------------|
| C  | 1.60673000  | -0.59842100 | 2.21974300  |
| C  | 2.88747800  | -0.38572100 | 1.66862900  |
| C  | 3.05053100  | 0.06522900  | 0.39464400  |
| C  | 1.93128100  | 0.40208600  | -0.46112500 |
| C  | 0.64981600  | 0.00999000  | 0.09181700  |
| C  | 0.50650300  | -0.36331300 | 1.44895700  |
| H  | 3.76582500  | -0.57282900 | 2.26775800  |
| H  | 0.95234400  | -1.37769700 | -0.49414500 |
| Cl | 4.62316600  | 0.36458100  | -0.23361900 |
| H  | -3.59297000 | 2.44421300  | 0.67618300  |
| C  | -2.75455400 | 1.90458600  | 0.26192800  |
| C  | -1.58628600 | 2.62257700  | -0.11109400 |
| C  | -2.87860200 | 0.55799500  | 0.10617800  |
| C  | -0.54601900 | 1.95108700  | -0.62449700 |
| C  | -1.82593800 | -0.23290600 | -0.43372400 |
| C  | -0.54449100 | 0.47791900  | -0.75456200 |
| H  | 0.36601100  | 2.43394200  | -0.94146800 |
| H  | -0.48436000 | -0.52466700 | 1.85049400  |
| O  | 0.86372700  | -2.36983800 | -1.00819800 |
| H  | 1.20553300  | -3.06094500 | -0.43512500 |
| H  | -0.15277000 | -2.41147900 | -1.04175500 |
| H  | -0.26289600 | 0.25303800  | -1.78969100 |
| Cl | -4.36234300 | -0.18424100 | 0.56215500  |
| S  | -2.02225100 | -1.85891900 | -0.69050800 |
| O  | 2.03595400  | 0.90381000  | -1.58329300 |
| H  | -1.56040000 | 3.69155900  | 0.02310000  |
| H  | 1.50956900  | -0.93664200 | 3.23822300  |

TS63

|    |             |             |             |
|----|-------------|-------------|-------------|
| C  | -1.49146500 | -1.58711500 | -1.89588100 |
| C  | -2.75758700 | -1.19047500 | -1.42029800 |
| C  | -2.89357900 | -0.26845400 | -0.42552300 |
| C  | -1.77049000 | 0.37784400  | 0.19455400  |
| C  | -0.49310400 | -0.17867600 | -0.20005500 |
| C  | -0.38350900 | -1.05326900 | -1.32155600 |
| H  | -3.64969100 | -1.61014600 | -1.85855600 |
| H  | -0.62923000 | -1.15925600 | 0.78539500  |
| Cl | -4.48212500 | 0.18280000  | 0.05157000  |
| H  | 4.21111100  | 1.70318400  | -1.23347000 |
| C  | 3.26000900  | 1.38211200  | -0.83558100 |
| C  | 2.09265600  | 2.17310100  | -1.10019100 |
| C  | 3.21711500  | 0.24794100  | -0.10827500 |
| C  | 0.90949400  | 1.80707800  | -0.59997000 |

|      |             |             |             |
|------|-------------|-------------|-------------|
| C    | 1.96699600  | -0.25288300 | 0.42392100  |
| C    | 0.74448700  | 0.59647200  | 0.23481800  |
| H    | 0.01565600  | 2.39363600  | -0.75159000 |
| H    | 0.60116000  | -1.34131800 | -1.66243800 |
| O    | -0.41727900 | -1.94770100 | 1.70706500  |
| H    | -0.72761000 | -2.82919200 | 1.49668000  |
| H    | 0.57809100  | -1.89688300 | 1.61410600  |
| H    | 0.48237200  | 0.98467200  | 1.23900000  |
| Cl   | 4.62488000  | -0.68912800 | 0.17744700  |
| O    | 1.92603000  | -1.32279100 | 1.02773000  |
| S    | -1.91027300 | 1.58970100  | 1.33289700  |
| H    | -1.41778000 | -2.29468800 | -2.70537800 |
| H    | 2.19729700  | 3.06420900  | -1.69752900 |
| TS64 |             |             |             |
| C    | -2.43056200 | 2.22714000  | -1.02129700 |
| C    | -3.30894500 | 1.19560100  | -0.75586200 |
| C    | -2.84297500 | 0.03111200  | -0.17488200 |
| C    | -1.50053300 | -0.12423300 | 0.18023500  |
| C    | -0.61515600 | 0.92846000  | -0.10684700 |
| C    | -1.09274400 | 2.08531000  | -0.70926100 |
| H    | -4.35487400 | 1.27765800  | -1.00248400 |
| H    | 0.28237000  | -0.71994700 | -1.57086300 |
| Cl   | -3.98455400 | -1.22852000 | 0.11418700  |
| H    | 4.57732600  | 0.66812900  | 1.08717600  |
| C    | 3.52643900  | 0.73347600  | 0.85580300  |
| C    | 2.71536900  | 1.66530000  | 1.47743300  |
| C    | 2.99588500  | -0.12766500 | -0.08362100 |
| C    | 1.37253600  | 1.71949000  | 1.15971100  |
| C    | 1.64554200  | -0.07793400 | -0.41092100 |
| Cl   | 4.00973600  | -1.27035500 | -0.87506500 |
| C    | 0.82297900  | 0.84701400  | 0.23119600  |
| H    | -1.92705100 | -1.71835200 | 1.87592600  |
| H    | -2.77492900 | -1.71929400 | 2.81624600  |
| H    | 0.72438700  | 2.43198700  | 1.64674000  |
| H    | -0.39348400 | 2.87753800  | -0.92763000 |
| S    | -0.88501000 | -1.58212400 | 0.95081800  |
| O    | 1.19128300  | -0.92425700 | -1.34773300 |
| H    | -2.79008800 | 3.13404600  | -1.48091400 |
| H    | 3.13113900  | 2.33870800  | 2.20937400  |
| TS65 |             |             |             |
| C    | -1.81884100 | 2.98510600  | 0.24065200  |

|    |             |             |             |
|----|-------------|-------------|-------------|
| C  | -2.77687400 | 2.14034000  | -0.28285000 |
| C  | -2.45509500 | 0.82108600  | -0.53928700 |
| C  | -1.18307600 | 0.31189300  | -0.26065800 |
| C  | -0.21588900 | 1.18659000  | 0.26165100  |
| C  | -0.54723400 | 2.51131800  | 0.50302300  |
| H  | -3.77177000 | 2.49274700  | -0.49984800 |
| H  | 2.13087200  | -0.31248400 | -2.22400100 |
| Cl | -3.68584000 | -0.18881300 | -1.19231600 |
| H  | 4.75878400  | -0.37826000 | 1.42797600  |
| C  | 3.75286700  | -0.05862600 | 1.20910000  |
| C  | 2.94252100  | 0.48446500  | 2.18714000  |
| C  | 3.26435800  | -0.19252500 | -0.07469100 |
| C  | 1.65525700  | 0.87976000  | 1.86856500  |
| C  | 1.97447900  | 0.19989400  | -0.40528800 |
| Cl | 4.26093800  | -0.85511600 | -1.32602000 |
| C  | 1.15215600  | 0.73476200  | 0.58511700  |
| H  | -1.89833300 | -1.94198500 | 0.23429500  |
| H  | 1.01115400  | 1.29323700  | 2.62961800  |
| H  | 0.21012000  | 3.17346600  | 0.89323300  |
| S  | -0.78488700 | -1.36346200 | -0.54705000 |
| H  | -1.75495200 | -2.75271900 | 2.26162700  |
| S  | -2.84340100 | -2.46574800 | 1.54032400  |
| O  | 1.48420500  | 0.10073200  | -1.64853500 |
| H  | -2.06410400 | 4.01716300  | 0.43619700  |
| H  | 3.31273900  | 0.59273700  | 3.19366400  |

TS66

|    |             |             |             |
|----|-------------|-------------|-------------|
| C  | -1.85180400 | 2.86097300  | 0.76805600  |
| C  | -2.81290500 | 2.12532500  | 0.10240200  |
| C  | -2.50197200 | 0.86967300  | -0.38130700 |
| C  | -1.22540400 | 0.32023400  | -0.18983600 |
| C  | -0.24898800 | 1.08764500  | 0.47794600  |
| C  | -0.57753900 | 2.34975600  | 0.94360100  |
| H  | -3.80488800 | 2.51700200  | -0.05128500 |
| H  | 0.81211000  | 1.13311800  | -1.65868000 |
| Cl | -3.72135000 | 0.00260300  | -1.21945200 |
| H  | 4.66718500  | -0.79869600 | 1.30647600  |
| C  | 3.67153300  | -0.41408400 | 1.15543900  |
| C  | 2.82229300  | -0.19621100 | 2.22503400  |
| C  | 3.25353800  | -0.13283100 | -0.12995400 |
| C  | 1.55113000  | 0.29360900  | 1.99897000  |
| C  | 1.97713200  | 0.36282000  | -0.36657000 |
| Cl | 4.31818300  | -0.38225500 | -1.45690800 |

|      |             |             |             |
|------|-------------|-------------|-------------|
| C    | 1.11471900  | 0.56344700  | 0.70987000  |
| H    | -2.02139900 | -1.92869600 | -0.38131300 |
| H    | 0.87024100  | 0.44906000  | 2.82154700  |
| H    | 0.17859600  | 2.92846200  | 1.45033200  |
| S    | -0.80286100 | -1.27520000 | -0.73105900 |
| Cl   | -2.53451400 | -2.73146300 | 1.09071400  |
| O    | 1.62506800  | 0.62810300  | -1.63582100 |
| H    | -2.09709100 | 3.84209000  | 1.14292800  |
| H    | 3.15064200  | -0.41714500 | 3.22756900  |
| TS67 |             |             |             |
| C    | -2.66526400 | 1.72494500  | -1.46186500 |
| C    | -3.51814800 | 0.81431400  | -0.86409300 |
| C    | -3.00334200 | -0.11301100 | 0.01802900  |
| C    | -1.63693600 | -0.13708600 | 0.32831700  |
| C    | -0.78271600 | 0.80550100  | -0.26825300 |
| C    | -1.31123600 | 1.71725200  | -1.16682100 |
| H    | -4.57398500 | 0.81327200  | -1.08050900 |
| H    | -0.12599900 | -1.35952700 | -1.22441400 |
| Cl   | -4.03830100 | -1.23831600 | 0.79509600  |
| H    | 4.35611800  | 1.26267000  | 1.10306000  |
| C    | 3.31774600  | 1.17145300  | 0.82896600  |
| C    | 2.40809000  | 2.16584500  | 1.12425000  |
| C    | 2.89436000  | 0.03854900  | 0.16278300  |
| C    | 1.08688200  | 2.00653200  | 0.75405700  |
| C    | 1.56675200  | -0.14689800 | -0.21838600 |
| Cl   | 4.06362900  | -1.17397800 | -0.21629500 |
| C    | 0.64931100  | 0.86462500  | 0.09616600  |
| H    | -1.51614100 | -0.96881300 | 2.20646600  |
| H    | -1.81358500 | -0.78027300 | 3.10539300  |
| H    | 0.36373700  | 2.77319300  | 0.98694500  |
| H    | -0.64911700 | 2.42682300  | -1.63837700 |
| O    | -1.13030700 | -1.05800600 | 1.13002000  |
| S    | 1.17944400  | -1.60418400 | -1.11358000 |
| H    | 2.72713300  | 3.05625900  | 1.64170500  |
| H    | -3.06036500 | 2.44424800  | -2.16167800 |
| TS68 |             |             |             |
| C    | 2.44403500  | -2.37048700 | -0.93330200 |
| C    | 3.33871600  | -1.32815100 | -0.76954600 |
| C    | 2.89136100  | -0.11748700 | -0.28372000 |
| C    | 1.54377400  | 0.06886400  | 0.05655000  |
| C    | 0.64214300  | -0.99755600 | -0.10967500 |

|    |             |             |             |
|----|-------------|-------------|-------------|
| C  | 1.10735800  | -2.20178500 | -0.60692000 |
| H  | 4.38055900  | -1.44398200 | -1.02009400 |
| H  | -0.03930100 | 0.54745800  | -1.86128600 |
| Cl | 3.98701400  | 1.18534900  | -0.07510300 |
| H  | -4.41068600 | -0.64052800 | 1.57638100  |
| C  | -3.39017800 | -0.71557900 | 1.23763200  |
| C  | -2.48385200 | -1.54274000 | 1.86915200  |
| C  | -2.98736100 | 0.02612200  | 0.14494000  |
| C  | -1.18488700 | -1.60723200 | 1.40243500  |
| C  | -1.68363200 | -0.02235000 | -0.34420600 |
| Cl | -4.15073800 | 1.03181100  | -0.63992600 |
| C  | -0.76783300 | -0.85413000 | 0.31340900  |
| H  | 1.66225700  | 1.74451400  | 1.17591600  |
| H  | -0.46348800 | -2.24140400 | 1.89453400  |
| H  | 0.40936500  | -3.01399400 | -0.73860600 |
| H  | 1.14537200  | 2.20719100  | 2.90323100  |
| O  | 1.96769700  | 2.00195700  | 2.44539300  |
| O  | 1.07470300  | 1.22612400  | 0.47541900  |
| S  | -1.31629800 | 0.92157200  | -1.77529000 |
| H  | 2.79116900  | -3.31625200 | -1.31791800 |
| H  | -2.78821400 | -2.12946300 | 2.72098500  |

TS69

|    |             |             |             |
|----|-------------|-------------|-------------|
| C  | 1.54282000  | -2.61244000 | 1.34285500  |
| C  | 2.71947000  | -2.21147200 | 0.72503300  |
| C  | 2.72545500  | -1.06172000 | -0.02769200 |
| C  | 1.55285700  | -0.28335100 | -0.18130100 |
| C  | 0.36895200  | -0.69099300 | 0.48337200  |
| C  | 0.38328700  | -1.86070600 | 1.21941200  |
| H  | 3.62400900  | -2.78847500 | 0.82606100  |
| H  | -1.01443200 | -2.16197400 | -0.94167900 |
| Cl | 4.15514100  | -0.53141000 | -0.79789800 |
| H  | -3.93683200 | 2.44786000  | 0.59151000  |
| C  | -3.05833800 | 1.82490100  | 0.54728200  |
| C  | -1.83275500 | 2.28258400  | 0.99134800  |
| C  | -3.16199600 | 0.55130500  | 0.02595200  |
| C  | -0.73232200 | 1.45369500  | 0.92556100  |
| C  | -2.06262900 | -0.30060400 | -0.06122800 |
| Cl | -4.70350400 | 0.01452800  | -0.53457900 |
| C  | -0.83412300 | 0.16102900  | 0.42654100  |
| H  | 2.27728000  | 1.62650700  | -0.72037100 |
| H  | 0.22812600  | 1.79815700  | 1.27883700  |
| H  | -0.52172200 | -2.17681900 | 1.71529500  |

|      |             |             |             |
|------|-------------|-------------|-------------|
| H    | 1.81192600  | 3.67004500  | -0.39568500 |
| S    | 2.88040000  | 2.94109400  | -0.06017500 |
| O    | 1.53321300  | 0.75299100  | -0.95785200 |
| S    | -2.30987700 | -1.87433400 | -0.80670700 |
| H    | -1.74068000 | 3.27928900  | 1.39198000  |
| H    | 1.53634700  | -3.51306200 | 1.93628500  |
| TS70 |             |             |             |
| C    | 2.11804500  | -2.79599000 | 0.68691500  |
| C    | 3.07164900  | -1.96486200 | 0.12378300  |
| C    | 2.72071100  | -0.68930800 | -0.25825000 |
| C    | 1.39944200  | -0.22150100 | -0.06464900 |
| C    | 0.42944200  | -1.08680900 | 0.50277100  |
| C    | 0.80851500  | -2.35867700 | 0.86877800  |
| H    | 4.08351400  | -2.30282400 | -0.02774500 |
| H    | -0.33575700 | -1.14384800 | -1.79492600 |
| Cl   | 3.86512000  | 0.34691300  | -0.97519800 |
| H    | -4.43066600 | 0.78327200  | 1.63935700  |
| C    | -3.45138200 | 0.39352800  | 1.41417200  |
| C    | -2.55568700 | 0.08660000  | 2.41831800  |
| C    | -3.09420900 | 0.19447300  | 0.09517800  |
| C    | -1.30742100 | -0.40384800 | 2.08871200  |
| C    | -1.84213800 | -0.29865700 | -0.26253600 |
| Cl   | -4.24162400 | 0.56440300  | -1.13752500 |
| C    | -0.93502600 | -0.58630300 | 0.76422900  |
| H    | 1.68259100  | 1.74023000  | -0.28260100 |
| H    | -0.59042800 | -0.62665100 | 2.86367800  |
| H    | 0.07289500  | -3.01845700 | 1.30118700  |
| Cl   | 2.25915200  | 3.07285400  | 0.72734700  |
| H    | 2.39438100  | -3.79597700 | 0.98146100  |
| H    | -2.82662600 | 0.23893900  | 3.45043600  |
| S    | -1.52262100 | -0.55943600 | -1.96749200 |
| O    | 1.01692200  | 0.96669000  | -0.42051400 |
| TS71 |             |             |             |
| C    | -1.06505900 | 2.11317900  | -0.97422900 |
| C    | -2.20328600 | 1.53608000  | -0.33694500 |
| C    | -2.34974500 | 0.19848600  | -0.26284800 |
| C    | -1.35328000 | -0.69712900 | -0.85768200 |
| C    | -0.11957400 | -0.04793300 | -1.32244400 |
| C    | -0.08091400 | 1.33350600  | -1.51433500 |
| H    | -2.96561300 | 2.18160700  | 0.07063800  |
| H    | 0.58934500  | -0.70697900 | -1.80167400 |



|    |             |             |             |
|----|-------------|-------------|-------------|
| Cl | -3.72619900 | -0.52369200 | 0.44509200  |
| H  | -0.55628600 | 0.03255500  | 2.05609900  |
| C  | 0.26479500  | 0.45117900  | 1.49721200  |
| C  | 0.54134000  | 1.78046100  | 1.52623300  |
| C  | 1.02060800  | -0.40916900 | 0.66986500  |
| C  | 1.68409300  | 2.28485800  | 0.84438700  |
| C  | 2.26619600  | 0.05539300  | 0.04477900  |
| Cl | 0.79898100  | -2.08229600 | 0.88771200  |
| C  | 2.50676100  | 1.46340400  | 0.15383000  |
| H  | 3.39595400  | 1.83837500  | -0.32663800 |
| H  | 0.75981200  | 1.78101600  | -2.01813100 |
| H  | 1.90934700  | 3.33879700  | 0.90690200  |
| S  | 3.32244900  | -0.93717200 | -0.73434700 |
| H  | -0.05914600 | 2.44272300  | 2.12959000  |
| H  | -1.02301700 | 3.18681300  | -1.07210900 |
| O  | -1.51481200 | -1.89653000 | -0.95746600 |

TS72

|    |             |             |             |
|----|-------------|-------------|-------------|
| C  | -1.27627100 | 2.34252000  | -0.63781700 |
| C  | -2.44289900 | 1.69623000  | -0.07793900 |
| C  | -2.56917300 | 0.36319900  | -0.07547400 |
| C  | -1.53833800 | -0.49486100 | -0.68950300 |
| C  | -0.18964400 | 0.14835400  | -0.96257400 |
| C  | -0.23378500 | 1.63624100  | -1.07274800 |
| H  | -3.23956000 | 2.30574900  | 0.32060300  |
| H  | 0.18787800  | -0.28955200 | -1.88539600 |
| Cl | -3.96616800 | -0.42016100 | 0.52829500  |
| H  | -0.60884900 | 0.06593500  | 1.73986700  |
| C  | 0.43272300  | 0.19308100  | 1.48938500  |
| C  | 1.31063500  | 0.60809500  | 2.40720000  |
| C  | 0.84932000  | -0.18998600 | 0.12407400  |
| C  | 2.70086600  | 0.73964800  | 2.07689900  |
| C  | 2.26189000  | 0.19549000  | -0.25204400 |
| Cl | 1.00597800  | -2.08158700 | 0.22629400  |
| C  | 3.14950500  | 0.53034800  | 0.82342700  |
| H  | 4.18906000  | 0.66194400  | 0.57122700  |
| H  | 0.80166600  | -4.05885200 | 0.06787000  |
| H  | 0.63116300  | 2.12218300  | -1.49655700 |
| H  | 3.39661700  | 1.02731400  | 2.85036400  |
| S  | 2.78441800  | 0.18628900  | -1.80139000 |
| H  | -1.27722600 | 3.41891300  | -0.70816000 |
| H  | 0.97981200  | 0.84016800  | 3.40706500  |
| O  | -1.75212500 | -1.64435800 | -0.97374600 |

## TS73

|    |             |             |             |
|----|-------------|-------------|-------------|
| C  | 1.42937800  | -2.54662200 | -0.67806900 |
| C  | 2.57066200  | -1.85867400 | -0.11968900 |
| C  | 2.62505100  | -0.52113900 | -0.05302900 |
| C  | 1.53426300  | 0.30987900  | -0.58310700 |
| C  | 0.23010100  | -0.39786600 | -0.91374000 |
| C  | 0.34645000  | -1.87759700 | -1.06976200 |
| H  | 3.41203400  | -2.43839300 | 0.22818800  |
| H  | -0.14668300 | 0.04232300  | -1.83668000 |
| Cl | 3.99800100  | 0.30193100  | 0.55254600  |
| H  | 0.56315500  | -0.34608600 | 1.79230800  |
| C  | -0.47520300 | -0.45292300 | 1.51790400  |
| C  | -1.39652800 | -0.78378400 | 2.44563100  |
| C  | -0.84687000 | -0.16789800 | 0.14799300  |
| C  | -2.76890800 | -0.90842200 | 2.09168400  |
| C  | -2.23825500 | -0.48294800 | -0.24156200 |
| Cl | -1.08913600 | 1.88530800  | 0.17204600  |
| C  | -3.16849700 | -0.75399100 | 0.80718200  |
| H  | -4.20114300 | -0.87613200 | 0.52385400  |
| O  | -0.33860500 | 3.75347100  | -0.17964100 |
| H  | 0.50312700  | 3.43680300  | -0.53626500 |
| H  | -0.51002000 | -2.38923600 | -1.48117800 |
| H  | -3.49316000 | -1.14507900 | 2.85541200  |
| S  | -2.72879700 | -0.51471800 | -1.82306500 |
| H  | -1.09280700 | -0.95529600 | 3.46621100  |
| H  | 1.47968100  | -3.61947200 | -0.77546300 |
| O  | 1.66935600  | 1.49589200  | -0.75711100 |

## TS74

|    |             |             |             |
|----|-------------|-------------|-------------|
| C  | 1.68050100  | -2.52062100 | -0.96321600 |
| C  | 2.76636100  | -1.81286200 | -0.32355100 |
| C  | 2.71081600  | -0.49246000 | -0.10200700 |
| C  | 1.55465600  | 0.30232900  | -0.54617500 |
| C  | 0.30581500  | -0.46656100 | -0.94264700 |
| C  | 0.54260600  | -1.90241300 | -1.27583600 |
| H  | 3.65433500  | -2.35893700 | -0.04364100 |
| H  | -0.12773200 | 0.04946700  | -1.79877100 |
| Cl | 4.01495700  | 0.36672000  | 0.59861700  |
| H  | 0.69211900  | -0.70769900 | 1.75292600  |
| C  | -0.33099700 | -0.90278700 | 1.47098900  |
| C  | -1.18495100 | -1.47218900 | 2.34294700  |
| C  | -0.76463300 | -0.46368000 | 0.15318500  |

|      |             |             |             |
|------|-------------|-------------|-------------|
| C    | -2.54181300 | -1.71014300 | 1.97836800  |
| C    | -2.12432500 | -0.89875300 | -0.27579100 |
| Cl   | -1.15646500 | 1.48657500  | 0.52571300  |
| C    | -2.98755900 | -1.42640700 | 0.73281500  |
| H    | -4.00473700 | -1.63374200 | 0.44295300  |
| H    | 0.34354300  | 3.59192400  | -0.37920600 |
| H    | -0.27049700 | -2.43120300 | -1.74845800 |
| H    | -3.21525800 | -2.13865600 | 2.70435300  |
| S    | -0.93171100 | 3.87864900  | -0.09322300 |
| H    | -0.84202600 | -1.75047600 | 3.32687600  |
| H    | 1.81823600  | -3.56621000 | -1.18887800 |
| O    | 1.59738600  | 1.50470800  | -0.60828600 |
| S    | -2.64205700 | -0.75357900 | -1.83239900 |
| TS75 |             |             |             |
| C    | 2.21415400  | -2.16098800 | -0.91432200 |
| C    | 3.14112800  | -1.25054300 | -0.27798800 |
| C    | 2.84421700  | 0.04420200  | -0.10900300 |
| C    | 1.57125600  | 0.60236800  | -0.60332600 |
| C    | 0.48503500  | -0.39580700 | -0.97335700 |
| C    | 0.98824800  | -1.77366100 | -1.26251400 |
| H    | 4.10424000  | -1.62027600 | 0.03899100  |
| H    | -0.03452700 | 0.00644200  | -1.84144300 |
| Cl   | 3.94911400  | 1.14994300  | 0.58541400  |
| H    | 0.89840700  | -0.30277000 | 1.73376300  |
| C    | -0.04781500 | -0.75303800 | 1.47839400  |
| C    | -0.76043100 | -1.42341300 | 2.41510900  |
| C    | -0.55311400 | -0.55406900 | 0.13632800  |
| C    | -2.01430200 | -2.00089500 | 2.09315500  |
| C    | -1.79081500 | -1.30215000 | -0.22588500 |
| Cl   | -1.36717900 | 1.28494600  | 0.45859800  |
| C    | -2.50805400 | -1.93455500 | 0.82897300  |
| H    | -3.44996000 | -2.39196800 | 0.57370900  |
| Cl   | -2.36981300 | 3.38981700  | -0.18028500 |
| H    | 0.30167900  | -2.45666300 | -1.73783100 |
| H    | -2.57528600 | -2.50990700 | 2.86127300  |
| H    | 2.54727500  | -3.16773700 | -1.11170800 |
| H    | -0.37038000 | -1.51876200 | 3.41594700  |
| S    | -2.34877100 | -1.37003700 | -1.77605000 |
| O    | 1.39197000  | 1.78468700  | -0.71408200 |
| TS76 |             |             |             |
| C    | 1.88488100  | -1.81930000 | -1.38767500 |

|    |             |             |             |
|----|-------------|-------------|-------------|
| C  | 2.86459800  | -1.02219100 | -0.72248500 |
| C  | 2.50334500  | -0.05705400 | 0.14680800  |
| C  | 1.09270800  | 0.18945700  | 0.47911300  |
| C  | 0.09914300  | -0.48217500 | -0.42239200 |
| C  | 0.56209200  | -1.58692100 | -1.21676500 |
| H  | 3.91187000  | -1.21050300 | -0.90047800 |
| H  | -0.06145900 | 0.49733400  | -1.26088400 |
| Cl | 3.66285300  | 0.86271200  | 0.99855600  |
| H  | -1.28702400 | -2.26894800 | 1.20694900  |
| C  | -1.87345400 | -1.42537400 | 0.87524900  |
| C  | -3.18077500 | -1.26974300 | 1.30153700  |
| C  | -1.30771700 | -0.47258600 | 0.04927000  |
| C  | -3.91499200 | -0.16065400 | 0.90386500  |
| C  | -2.06218900 | 0.62066200  | -0.38346100 |
| C  | -3.36348900 | 0.79426300  | 0.07145900  |
| H  | -3.93780900 | 1.65410300  | -0.23475500 |
| H  | -0.17496900 | -2.18590600 | -1.72927700 |
| H  | -4.92989300 | -0.03834900 | 1.24966800  |
| S  | -1.26566200 | 1.65188400  | -1.53432500 |
| H  | -3.62232800 | -1.99992500 | 1.96123400  |
| H  | 2.21999600  | -2.61538500 | -2.03349000 |
| O  | 0.75485000  | 0.90262800  | 1.39345700  |

TS77

|   |             |             |             |
|---|-------------|-------------|-------------|
| C | 1.59660800  | -1.58146400 | 1.56572500  |
| C | 2.72498200  | -0.94975200 | 0.98857700  |
| C | 2.58972500  | 0.14111600  | 0.19402400  |
| C | 1.30126400  | 0.76765900  | -0.09113700 |
| C | 0.15788800  | -0.04101600 | 0.34136700  |
| C | 0.35721200  | -1.11056000 | 1.27259600  |
| H | 3.71642500  | -1.32143600 | 1.19984100  |
| H | 0.46124500  | -0.92531800 | -0.85386000 |
| H | -4.83058600 | 1.93327200  | 0.19434300  |
| C | -3.83228100 | 1.52555400  | 0.17588000  |
| C | -2.72138400 | 2.36397300  | 0.28349700  |
| C | -3.63927100 | 0.17989900  | 0.03822300  |
| C | -1.44165000 | 1.85054800  | 0.28308700  |
| C | -2.33633900 | -0.37130000 | -0.02176700 |
| C | -1.20536400 | 0.48180700  | 0.17602300  |
| H | -0.59538900 | 2.50767600  | 0.38040700  |
| H | -0.51507300 | -1.56575700 | 1.71792000  |
| O | 0.50005400  | -1.76343900 | -1.62475200 |
| H | 1.21536000  | -2.35104200 | -1.36282600 |

|      |             |             |             |
|------|-------------|-------------|-------------|
| H    | -0.37776500 | -2.16863500 | -1.37764900 |
| S    | -2.25282800 | -2.01979200 | -0.45305000 |
| O    | 1.20907600  | 1.80849200  | -0.73017200 |
| H    | 1.73256400  | -2.40010400 | 2.25318900  |
| H    | -2.86160300 | 3.42828200  | 0.39454200  |
| H    | -4.47441500 | -0.49406300 | -0.06852500 |
| Cl   | 3.97606600  | 0.92791800  | -0.44857400 |
| TS78 |             |             |             |
| C    | 2.19148200  | 2.27082300  | 0.57845800  |
| C    | 2.92319000  | 1.16029100  | 0.14549800  |
| C    | 2.29510200  | 0.00224100  | -0.23995300 |
| C    | 0.89162200  | -0.06514300 | -0.22994200 |
| C    | 0.16811900  | 1.05967100  | 0.23978900  |
| C    | 0.81805800  | 2.22696600  | 0.62196500  |
| H    | 4.00045300  | 1.20216200  | 0.11368700  |
| H    | -2.05344200 | -1.32639700 | 2.27855200  |
| Cl   | 3.19314900  | -1.35786000 | -0.78105900 |
| H    | -2.00375600 | 2.71862600  | -0.27272200 |
| C    | -2.21265700 | 1.65972100  | -0.28372900 |
| C    | -3.39617200 | 1.18465000  | -0.80238800 |
| C    | -1.22492200 | 0.76885600  | 0.11819100  |
| C    | -3.59309100 | -0.19758800 | -0.95937800 |
| C    | -1.49392200 | -0.64439000 | 0.13250400  |
| C    | -2.66578000 | -1.10042900 | -0.51969400 |
| H    | -2.84577000 | -2.16151800 | -0.57576200 |
| H    | 0.24988700  | 3.07408700  | 0.97482100  |
| H    | -4.51008200 | -0.55434000 | -1.40279100 |
| S    | -0.97509800 | -1.63735200 | 1.54928900  |
| H    | -4.15187900 | 1.87425500  | -1.14361000 |
| H    | 2.71900900  | 3.15756000  | 0.89095600  |
| O    | 0.21343100  | -1.08215300 | -0.64770900 |
| TS79 |             |             |             |
| C    | 2.37423600  | 2.24172600  | 0.29732000  |
| C    | 3.02232000  | 1.03692600  | 0.04969100  |
| C    | 2.30187900  | -0.12295300 | -0.18465700 |
| C    | 0.92665800  | -0.04884300 | -0.15754000 |
| C    | 0.26559800  | 1.15704500  | 0.09378100  |
| C    | 0.99462800  | 2.31816100  | 0.31473200  |
| H    | 4.09926700  | 0.99008300  | 0.03726600  |
| H    | -1.46593900 | 0.00383300  | 2.29242800  |
| Cl   | 3.08870600  | -1.61335600 | -0.51047900 |

|      |             |             |             |
|------|-------------|-------------|-------------|
| H    | -2.22886100 | 2.68013600  | -0.16229600 |
| C    | -2.25589100 | 1.60536900  | -0.25768700 |
| C    | -3.39935300 | 0.97163700  | -0.73257700 |
| C    | -1.12820900 | 0.85511400  | -0.03206700 |
| C    | -3.37253700 | -0.39813300 | -1.09458000 |
| C    | -1.19859300 | -0.62519700 | -0.04315600 |
| C    | -2.29483600 | -1.17913200 | -0.84721000 |
| H    | -2.25201100 | -2.21915600 | -1.12900600 |
| H    | 0.49509800  | 3.25543200  | 0.50290200  |
| H    | -4.22824200 | -0.81921800 | -1.59885500 |
| S    | -1.48429400 | -1.21379600 | 1.74789500  |
| H    | 2.96489800  | 3.12562800  | 0.47755400  |
| H    | -4.28799500 | 1.55030600  | -0.92739900 |
| O    | 0.09113800  | -1.07369500 | -0.40213300 |
| TS80 |             |             |             |
| C    | 0.23764500  | -2.23075900 | -1.10934900 |
| C    | 1.41006700  | -2.02938300 | -0.33164400 |
| C    | 1.91203600  | -0.78726900 | -0.12629400 |
| C    | 1.27722400  | 0.37059300  | -0.69550800 |
| C    | -0.04694900 | 0.14101300  | -1.24454400 |
| C    | -0.44985300 | -1.16927000 | -1.59910700 |
| H    | 1.93511600  | -2.88154700 | 0.07024100  |
| H    | -0.49682600 | 0.98976100  | -1.74139700 |
| Cl   | 3.37110100  | -0.60459200 | 0.75897400  |
| H    | 0.02832300  | -0.33445600 | 2.06573100  |
| C    | -0.82182700 | -0.47532500 | 1.41751000  |
| C    | -1.50639300 | -1.63799700 | 1.38356500  |
| C    | -1.18580300 | 0.58554500  | 0.53852300  |
| C    | -2.69760000 | -1.76345600 | 0.59138200  |
| C    | -2.46897100 | 0.52140800  | -0.23038500 |
| Cl   | -0.68615300 | 2.15348700  | 0.96178600  |
| C    | -3.16413200 | -0.75291100 | -0.16258900 |
| H    | -4.07767000 | -0.82755300 | -0.73062000 |
| H    | -1.32827300 | -1.30476400 | -2.20810900 |
| H    | -3.24191700 | -2.69555400 | 0.63000200  |
| H    | -1.20708000 | -2.45823900 | 2.01659000  |
| H    | -0.07063600 | -3.23987800 | -1.33353100 |
| O    | -2.87022400 | 1.46801500  | -0.88268300 |
| S    | 1.92524900  | 1.87773400  | -0.72185700 |
| TS81 |             |             |             |
| C    | -0.80427800 | -2.25593500 | 1.26081100  |

|    |             |             |             |
|----|-------------|-------------|-------------|
| C  | -1.89869000 | -1.95284600 | 0.37597500  |
| C  | -2.17500300 | -0.68939300 | -0.00022000 |
| C  | -1.40009600 | 0.42958000  | 0.50280700  |
| C  | -0.04607900 | 0.07866600  | 1.06660400  |
| C  | 0.05985600  | -1.30528100 | 1.61675200  |
| H  | -2.54064300 | -2.75176700 | 0.03891800  |
| H  | 0.21697600  | 0.80442900  | 1.83221500  |
| Cl | -3.53626700 | -0.38475800 | -1.00293800 |
| H  | -0.12704500 | -0.54083000 | -1.67798700 |
| C  | 0.86224900  | -0.55891300 | -1.24797400 |
| C  | 1.87285500  | -1.16813300 | -1.87429700 |
| C  | 1.07443000  | 0.18288000  | 0.00684100  |
| C  | 3.21183300  | -1.15318300 | -1.33148500 |
| C  | 2.43429200  | -0.01376800 | 0.66501800  |
| Cl | 1.23507200  | 1.99705400  | -0.55500500 |
| C  | 3.49375900  | -0.58395800 | -0.15181900 |
| H  | 4.48317600  | -0.58642200 | 0.27602400  |
| H  | 1.12881900  | 3.86058600  | -0.81522800 |
| H  | 0.89170200  | -1.50902300 | 2.27213500  |
| H  | 3.99964100  | -1.62300400 | -1.90141100 |
| H  | -0.70505800 | -3.26428200 | 1.63042700  |
| H  | 1.70019100  | -1.67128600 | -2.81255000 |
| O  | 2.59791900  | 0.30293100  | 1.82128900  |
| S  | -1.92634700 | 1.96192800  | 0.48363000  |

TS82

|    |             |             |             |
|----|-------------|-------------|-------------|
| C  | 1.32029100  | -2.44597000 | -1.11615900 |
| C  | 2.32200900  | -1.90728100 | -0.23556300 |
| C  | 2.37133900  | -0.59503500 | 0.06864500  |
| C  | 1.42772400  | 0.34342300  | -0.50475100 |
| C  | 0.17080100  | -0.26667800 | -1.07454400 |
| C  | 0.31642900  | -1.67925600 | -1.54287500 |
| H  | 3.08322700  | -2.56268300 | 0.15820000  |
| H  | -0.18445300 | 0.35609700  | -1.89181900 |
| Cl | 3.64260000  | -0.00740200 | 1.06247100  |
| H  | 0.24200000  | -0.61404000 | 1.71224000  |
| C  | -0.73587900 | -0.76722800 | 1.28353100  |
| C  | -1.73630400 | -1.30091200 | 2.02486700  |
| C  | -0.97377500 | -0.31857400 | -0.05955000 |
| C  | -3.05161600 | -1.47746000 | 1.48590900  |
| C  | -2.28781300 | -0.69440100 | -0.68534300 |
| Cl | -1.46426500 | 1.66636400  | 0.36047000  |
| C  | -3.33223600 | -1.16692300 | 0.20739100  |

|   |             |             |             |
|---|-------------|-------------|-------------|
| H | -4.30823400 | -1.31160800 | -0.22672700 |
| O | -1.62701000 | 3.57683700  | -0.02384400 |
| H | -0.78812700 | 3.69447800  | -0.48621000 |
| H | -0.45827000 | -2.05521800 | -2.19197100 |
| H | -3.82379700 | -1.87385900 | 2.12747100  |
| H | -1.54575800 | -1.59286700 | 3.04549400  |
| H | 1.40291700  | -3.47655100 | -1.42284200 |
| O | -2.44410100 | -0.60371700 | -1.88693500 |
| S | 1.69074200  | 1.94416900  | -0.55230800 |

TS83

|    |             |             |             |
|----|-------------|-------------|-------------|
| C  | 2.08810100  | -2.12310600 | -1.19089900 |
| C  | 2.91259500  | -1.35672200 | -0.29467200 |
| C  | 2.60075500  | -0.09196400 | 0.05091300  |
| C  | 1.43144000  | 0.56766100  | -0.49715700 |
| C  | 0.38179100  | -0.34865800 | -1.07676300 |
| C  | 0.90678100  | -1.65105300 | -1.59121900 |
| H  | 3.82853400  | -1.78895600 | 0.07722100  |
| H  | -0.15080500 | 0.17384500  | -1.86776300 |
| Cl | 3.66796800  | 0.79376800  | 1.06386800  |
| H  | 0.61713500  | -0.77431900 | 1.69049800  |
| C  | -0.28626000 | -1.18180000 | 1.26522400  |
| C  | -1.06894500 | -2.01433000 | 1.98519900  |
| C  | -0.68112700 | -0.75402300 | -0.05403000 |
| C  | -2.29595600 | -2.53336700 | 1.45310900  |
| C  | -1.84530100 | -1.47050500 | -0.68514200 |
| Cl | -1.70970800 | 0.98231100  | 0.43636700  |
| C  | -2.68968700 | -2.25748000 | 0.19772400  |
| H  | -3.59433700 | -2.65744100 | -0.23084900 |
| H  | -1.57212400 | 3.53335100  | -0.49912100 |
| H  | 0.25982800  | -2.20711700 | -2.25049000 |
| H  | -2.90509100 | -3.16432800 | 2.08251500  |
| S  | -2.73597600 | 3.09690800  | -0.00605700 |
| H  | -0.77583800 | -2.29105700 | 2.98558200  |
| H  | 2.44858300  | -3.08085200 | -1.53127900 |
| O  | -2.04617500 | -1.38177800 | -1.87925700 |
| S  | 1.24835000  | 2.17870800  | -0.51269100 |

TS84

|   |            |             |             |
|---|------------|-------------|-------------|
| C | 2.22337600 | -2.08438900 | -1.09695800 |
| C | 2.98855300 | -1.26481900 | -0.19274100 |
| C | 2.62609800 | 0.00088800  | 0.09188600  |
| C | 1.46521600 | 0.60740200  | -0.53538900 |



|    |             |             |             |
|----|-------------|-------------|-------------|
| C  | 0.45863700  | -0.36600100 | -1.10128200 |
| C  | 1.04272800  | -1.66808800 | -1.55617600 |
| H  | 3.89905100  | -1.65749100 | 0.23222800  |
| H  | -0.07636600 | 0.10977400  | -1.91923600 |
| Cl | 3.61595100  | 0.95621300  | 1.11921300  |
| H  | 0.62871100  | -0.60180200 | 1.69514800  |
| C  | -0.24750500 | -1.06647800 | 1.27201400  |
| C  | -1.04298600 | -1.85840500 | 2.04133800  |
| C  | -0.59694200 | -0.77512300 | -0.08298500 |
| C  | -2.23286700 | -2.45444100 | 1.52206600  |
| C  | -1.73521400 | -1.55510900 | -0.68316300 |
| Cl | -1.73461000 | 0.96293100  | 0.35069400  |
| C  | -2.58910000 | -2.29321600 | 0.23322700  |
| H  | -3.47159700 | -2.74534400 | -0.18950200 |
| Cl | -3.00447600 | 2.85545300  | -0.02830100 |
| H  | 0.44204400  | -2.26501000 | -2.22332800 |
| H  | -2.84753600 | -3.04525500 | 2.18360300  |
| H  | 2.63011700  | -3.03722600 | -1.39691100 |
| H  | -0.77643600 | -2.03456000 | 3.07146700  |
| O  | -1.90845500 | -1.56079400 | -1.88409700 |
| S  | 1.23581100  | 2.20386200  | -0.64743800 |

TS85

|    |             |             |             |
|----|-------------|-------------|-------------|
| C  | 1.82462100  | 2.43381400  | -0.14876500 |
| C  | 2.75208000  | 1.36631500  | -0.09682600 |
| C  | 2.35941500  | 0.06261500  | -0.03332600 |
| C  | 0.98071800  | -0.27983400 | -0.03820200 |
| C  | 0.04915600  | 0.81533800  | 0.07505800  |
| C  | 0.49808200  | 2.16707800  | -0.10072300 |
| H  | 3.80900000  | 1.58315700  | -0.12594900 |
| H  | -0.23460200 | 0.73365300  | 1.31334900  |
| Cl | 3.53409600  | -1.19004800 | -0.04312500 |
| H  | -1.49179600 | 0.60152900  | -2.35891100 |
| C  | -2.00645900 | 0.34430800  | -1.44653000 |
| C  | -3.32208200 | -0.07017500 | -1.47006900 |
| C  | -1.34656000 | 0.38717000  | -0.23338600 |
| C  | -3.98914800 | -0.44062900 | -0.28332000 |
| C  | -2.03978100 | 0.09233400  | 0.99613600  |
| C  | -3.38036100 | -0.37330100 | 0.93455400  |
| H  | -3.88981000 | -0.62694100 | 1.84949800  |
| H  | -0.23554500 | 2.95873600  | -0.12751900 |
| H  | -5.01388300 | -0.77363600 | -0.34709700 |
| H  | -3.85044200 | -0.12579000 | -2.40874700 |

|      |             |             |             |
|------|-------------|-------------|-------------|
| H    | 2.18946700  | 3.44514600  | -0.22166900 |
| O    | -1.38836200 | 0.31069500  | 2.05219200  |
| S    | 0.34167500  | -1.81754900 | -0.13656100 |
| TS86 |             |             |             |
| C    | 1.39865100  | 2.00096600  | -1.41254500 |
| C    | 2.52601700  | 1.23877900  | -1.03069200 |
| C    | 2.40217700  | 0.07753500  | -0.33438900 |
| C    | 1.12969900  | -0.46578900 | 0.06812100  |
| C    | -0.00530300 | 0.39009900  | -0.24852900 |
| C    | 0.16689300  | 1.56523700  | -1.06203300 |
| H    | 3.51482500  | 1.57500200  | -1.30144400 |
| H    | 0.13581400  | 1.05759700  | 0.95010700  |
| H    | -5.08581800 | -1.35243700 | -0.54542800 |
| C    | -4.07150400 | -0.99869400 | -0.44418100 |
| C    | -3.00325400 | -1.81292400 | -0.87137000 |
| C    | -3.81973400 | 0.22411900  | 0.08614000  |
| C    | -1.69428100 | -1.39262300 | -0.75331200 |
| C    | -2.47259800 | 0.69091300  | 0.24108400  |
| C    | -1.38348200 | -0.14772300 | -0.23073500 |
| H    | -0.89281200 | -2.03085300 | -1.08628500 |
| H    | -0.71733300 | 2.11739500  | -1.34287300 |
| O    | -0.02419800 | 1.73054400  | 1.99007800  |
| H    | 0.55767400  | 2.49153900  | 1.99478500  |
| H    | -0.94082700 | 2.00582200  | 1.72142500  |
| O    | -2.26381900 | 1.79464500  | 0.80486800  |
| S    | 0.98584500  | -1.86623900 | 0.95049400  |
| H    | 1.52913800  | 2.90111800  | -1.99082700 |
| H    | -3.21196400 | -2.77418700 | -1.31441100 |
| Cl   | 3.83556500  | -0.79013100 | 0.05119300  |
| H    | -4.60236200 | 0.88017400  | 0.43183600  |
| TS87 |             |             |             |
| C    | 2.13709200  | 2.35305200  | 0.31028500  |
| C    | 2.89289600  | 1.21581900  | 0.08274500  |
| C    | 2.27364800  | -0.00635900 | -0.12023000 |
| C    | 0.89073500  | -0.10845800 | -0.09797200 |
| C    | 0.14028400  | 1.05574300  | 0.13620500  |
| C    | 0.75411000  | 2.27744100  | 0.33542100  |
| H    | 3.96970500  | 1.26613300  | 0.06009700  |
| H    | -0.35794000 | -0.41712600 | 2.11130400  |
| Cl   | 3.22978200  | -1.40630500 | -0.42609100 |
| H    | -1.87367400 | 2.27855100  | -1.29386600 |

|      |             |             |             |
|------|-------------|-------------|-------------|
| C    | -2.17529800 | 1.37622600  | -0.78336700 |
| C    | -3.42262100 | 0.81163700  | -1.03922800 |
| C    | -1.28560700 | 0.76155500  | 0.06013600  |
| C    | -3.77173400 | -0.41463400 | -0.45933300 |
| C    | -1.63707800 | -0.49833200 | 0.69515500  |
| C    | -2.92451300 | -1.05264400 | 0.39781700  |
| H    | -3.20521200 | -1.95853300 | 0.91021600  |
| H    | 0.15618100  | 3.15694200  | 0.51888700  |
| H    | -4.73879900 | -0.84471300 | -0.66895100 |
| H    | -4.10891900 | 1.30630200  | -1.70758800 |
| H    | 2.63284800  | 3.29662900  | 0.47319700  |
| O    | -1.25667400 | -0.72646600 | 1.97864100  |
| S    | -0.03491000 | -1.56197200 | -0.38091700 |
| TS88 |             |             |             |
| C    | 2.08579100  | 2.43456100  | 0.12094000  |
| C    | 2.90052900  | 1.31066600  | 0.04108700  |
| C    | 2.33703000  | 0.05571100  | -0.06711000 |
| C    | 0.96027800  | -0.08229500 | -0.09498000 |
| C    | 0.14049500  | 1.04957600  | -0.01252000 |
| C    | 0.71298400  | 2.31218600  | 0.09188500  |
| H    | 3.97399400  | 1.40641900  | 0.06358700  |
| H    | -2.30787700 | -0.36298300 | 2.07599100  |
| Cl   | 3.33514200  | -1.34394200 | -0.17536300 |
| H    | -2.24911200 | 2.58528000  | -0.20371300 |
| C    | -2.36177200 | 1.51204100  | -0.21244600 |
| C    | -3.60922400 | 0.94666100  | -0.40158300 |
| C    | -1.25027200 | 0.69423200  | -0.08600300 |
| C    | -3.76665200 | -0.44420800 | -0.48772400 |
| C    | -1.42916300 | -0.72173200 | -0.02442700 |
| C    | -2.69300700 | -1.28033000 | -0.34509000 |
| H    | -2.80229100 | -2.35097400 | -0.40348700 |
| H    | 0.08596400  | 3.18787300  | 0.15678200  |
| H    | -4.74408100 | -0.85853900 | -0.67808800 |
| H    | 2.53984400  | 3.40870300  | 0.20841500  |
| H    | -4.47130600 | 1.58495800  | -0.51544300 |
| O    | -1.53861100 | -0.90847200 | 1.87751500  |
| S    | 0.08901400  | -1.57552300 | -0.24219800 |

**Table S5.** Cartesian coordinates for the reactants, intermediates and products involved in the formation of PCPT/DT/DFs from cross-condensation of 2-CPR and 2-CTPR.

|     |             |             |             |
|-----|-------------|-------------|-------------|
| IM1 |             |             |             |
| C   | -1.19329400 | -0.29057800 | -0.65423400 |
| C   | -1.81026500 | 0.91900600  | -0.36487400 |
| C   | -3.12727000 | 0.94584300  | 0.05452000  |
| C   | -3.83037600 | -0.23783500 | 0.17739900  |
| C   | -3.22243100 | -1.44349500 | -0.13132900 |
| C   | -1.90838000 | -1.47047500 | -0.55470400 |
| Cl  | -0.92724600 | 2.38616300  | -0.53043900 |
| H   | -3.58874000 | 1.89359800  | 0.27932800  |
| H   | -1.41826000 | -2.39524400 | -0.80796600 |
| C   | 1.20839200  | -0.57670900 | -0.41729700 |
| C   | 2.33852800  | -0.26964200 | -1.33886300 |
| C   | 3.27790600  | 0.61951900  | -1.03473400 |
| C   | 3.23520100  | 1.34073000  | 0.21408100  |
| C   | 2.27384700  | 1.12016000  | 1.12673100  |
| C   | 1.25251600  | 0.12815600  | 0.93874900  |
| Cl  | 1.31361200  | -2.36239500 | -0.10752400 |
| H   | 2.31743700  | -0.79947700 | -2.27737000 |
| H   | 2.25090100  | 1.65875200  | 2.06020500  |
| H   | 3.99848300  | 2.07750400  | 0.41298100  |
| H   | -3.77430100 | -2.36638800 | -0.04890000 |
| S   | 0.17938300  | -0.22333800 | 2.10463400  |
| H   | -4.85760900 | -0.21436000 | 0.50525700  |
| H   | 4.07571300  | 0.82387700  | -1.73099100 |
| O   | 0.07397000  | -0.27712300 | -1.16424600 |
| IM2 |             |             |             |
| C   | 1.64263700  | 0.13215700  | 0.16191000  |
| C   | 2.93216300  | -0.26873900 | -0.17638900 |
| C   | 4.02086000  | 0.51039900  | 0.16041000  |
| C   | 3.83993100  | 1.69832400  | 0.84623000  |
| C   | 2.56179300  | 2.10315800  | 1.18140500  |
| C   | 1.46758900  | 1.32995100  | 0.83500300  |
| Cl  | 3.16916700  | -1.75645900 | -1.01047300 |
| H   | 5.00703800  | 0.17211600  | -0.11387300 |
| H   | 0.47211100  | 1.68182300  | 1.05519100  |
| C   | -0.58828600 | -0.63412100 | 0.45622700  |
| C   | -1.02239200 | -2.01556000 | 0.79831000  |
| C   | -2.31351800 | -2.28405900 | 0.97959800  |

|    |             |             |             |
|----|-------------|-------------|-------------|
| C  | -3.30353800 | -1.26828400 | 0.72736700  |
| C  | -2.98765000 | -0.08688600 | 0.16122300  |
| C  | -1.62674700 | 0.21418100  | -0.24815100 |
| H  | -4.33884300 | -1.47987800 | 0.94470100  |
| H  | -0.46086000 | -0.13427000 | 1.43138800  |
| Cl | -4.23766000 | 1.02207100  | -0.23168800 |
| H  | 2.40452600  | 3.03460300  | 1.70199200  |
| H  | -0.23928000 | -2.73768800 | 0.96633800  |
| S  | -1.22247600 | 1.36498000  | -1.30962500 |
| H  | 4.69395200  | 2.30149900  | 1.10932800  |
| H  | -2.64281000 | -3.25769300 | 1.30488900  |
| O  | 0.63639000  | -0.68984000 | -0.20350900 |

IM3

|    |             |             |             |
|----|-------------|-------------|-------------|
| C  | 0.97492200  | 0.05540900  | -0.41629300 |
| C  | 2.25290100  | -0.39438400 | -0.11232600 |
| C  | 3.31907000  | 0.48305000  | -0.12891900 |
| C  | 3.12003000  | 1.81382600  | -0.45082300 |
| C  | 1.84826400  | 2.25957300  | -0.76158900 |
| C  | 0.77791100  | 1.38416200  | -0.74970800 |
| Cl | 2.50100500  | -2.04803400 | 0.28858800  |
| H  | 4.30131900  | 0.11210700  | 0.11545400  |
| H  | -0.21529600 | 1.72710500  | -0.99403100 |
| C  | -1.31621300 | -0.47642000 | -0.40120900 |
| C  | -2.09007400 | -0.77249800 | -1.50279100 |
| C  | -3.43923300 | -0.45742700 | -1.50567000 |
| C  | -4.01975400 | 0.16277100  | -0.40600300 |
| C  | -3.24924700 | 0.45302500  | 0.69607500  |
| C  | -1.87945900 | 0.13223200  | 0.74330300  |
| H  | -1.62195500 | -1.25258500 | -2.34708500 |
| H  | -3.68100500 | 0.92274700  | 1.56562800  |
| H  | 1.68172400  | 3.29390200  | -1.01834100 |
| H  | -5.06946500 | 0.40979600  | -0.41282600 |
| S  | -0.96690800 | 0.43066700  | 2.14935400  |
| H  | 3.95646200  | 2.49407800  | -0.45850300 |
| H  | -4.03771000 | -0.69415200 | -2.37173200 |
| O  | -0.01941900 | -0.86837600 | -0.42481200 |

IM4

|   |            |             |             |
|---|------------|-------------|-------------|
| C | 0.92786500 | 0.17905000  | 0.17905000  |
| C | 2.18717100 | 0.60881200  | 0.60881200  |
| C | 3.27125000 | -0.27329000 | -0.27329000 |
| C | 3.06154900 | -1.61924100 | -1.61924100 |

|    |             |             |             |
|----|-------------|-------------|-------------|
| C  | 1.82928700  | -2.08985400 | -2.08985400 |
| C  | 0.63417900  | -1.22671900 | -1.22671900 |
| Cl | 2.44820400  | 2.25636600  | 2.25636600  |
| H  | 4.25289100  | 0.09106400  | 0.09106400  |
| H  | 0.05099100  | -1.28435800 | -1.28435800 |
| C  | -1.38665500 | 0.64666300  | 0.64666300  |
| C  | -2.33362300 | 1.59801000  | 1.59801000  |
| C  | -3.67588200 | 1.30990200  | 1.30990200  |
| C  | -4.07670300 | 0.06512500  | 0.06512500  |
| C  | -3.12916800 | -0.88715300 | -0.88715300 |
| C  | -1.77181400 | -0.60979700 | -0.60979700 |
| H  | -1.99025200 | 2.55896400  | 2.55896400  |
| H  | -3.43114300 | -1.86618300 | -1.86618300 |
| H  | -5.12488000 | -0.16753700 | -0.16753700 |
| H  | 1.67953100  | -3.11933200 | -3.11933200 |
| S  | -0.56673400 | -1.81087500 | -1.81087500 |
| O  | -0.08934900 | 1.05270400  | 1.05270400  |
| H  | 3.91031900  | -2.28438100 | -2.28438100 |
| H  | -4.40912800 | 2.05685300  | 2.05685300  |

IM5

|    |             |             |             |
|----|-------------|-------------|-------------|
| C  | 0.90691000  | -0.44813400 | 0.23947800  |
| C  | 1.59048200  | 0.83667700  | -0.06932200 |
| C  | 2.94247300  | 0.94631500  | -0.16742400 |
| C  | 3.76552200  | -0.14778500 | 0.11938300  |
| C  | 3.19581500  | -1.35876800 | 0.56143800  |
| C  | 1.85544900  | -1.50100000 | 0.66577100  |
| Cl | 0.57523400  | 2.18047200  | -0.36990600 |
| H  | 3.37297800  | 1.89277300  | -0.45317100 |
| H  | 1.40106800  | -2.41140900 | 1.02234900  |
| C  | -1.34971500 | -0.18438400 | 0.74287400  |
| C  | -2.40982100 | 0.22118100  | 1.51857500  |
| C  | -3.67124200 | 0.25374300  | 0.93867800  |
| C  | -3.85224600 | -0.10871000 | -0.38433500 |
| C  | -2.77243400 | -0.51584500 | -1.15666100 |
| C  | -1.51960500 | -0.55540200 | -0.58035200 |
| H  | -2.24766300 | 0.50680400  | 2.54512100  |
| H  | -2.90986400 | -0.79692300 | -2.18866300 |
| H  | 3.83989600  | -2.17820400 | 0.84011900  |
| S  | -0.00624500 | -1.05932900 | -1.28912000 |
| H  | -4.83624000 | -0.07305600 | -0.82430400 |
| H  | 4.83528800  | -0.04753500 | 0.03678800  |
| H  | -4.51545800 | 0.57186400  | 1.52997000  |

|   |             |             |            |
|---|-------------|-------------|------------|
| O | -0.08857500 | -0.27629900 | 1.22968600 |
|---|-------------|-------------|------------|

IM6

|    |             |             |             |
|----|-------------|-------------|-------------|
| C  | 1.06767700  | 0.04033000  | -0.38659100 |
| C  | 2.36389000  | -0.21427300 | 0.04199800  |
| C  | 3.31040800  | 0.79497100  | 0.08084000  |
| C  | 2.96868400  | 2.07470900  | -0.30710100 |
| C  | 1.68212500  | 2.33979000  | -0.74707200 |
| C  | 0.74618800  | 1.32814800  | -0.79647800 |
| Cl | 2.83339300  | -1.80188500 | 0.52954100  |
| H  | 4.30676900  | 0.56497700  | 0.42191800  |
| H  | -0.25151700 | 1.53323100  | -1.15258200 |
| C  | -1.62527200 | -0.52069300 | -0.23220400 |
| C  | -2.68270200 | -0.87884500 | -1.04507400 |
| C  | -3.96145900 | -0.39051400 | -0.81093200 |
| C  | -4.21226300 | 0.49107500  | 0.25157300  |
| C  | -3.19765400 | 0.86126200  | 1.08061600  |
| C  | -1.85924600 | 0.35311500  | 0.91138500  |
| H  | -2.50498900 | -1.53515100 | -1.88316900 |
| H  | -3.34900000 | 1.53174400  | 1.91191200  |
| H  | 1.40786600  | 3.33475900  | -1.06053300 |
| H  | -5.21028900 | 0.87066000  | 0.40653400  |
| H  | 3.70715100  | 2.85979000  | -0.26956900 |
| H  | -4.76588600 | -0.68026600 | -1.46884800 |
| O  | -0.96517000 | 0.63708700  | 1.71658200  |
| S  | -0.08679300 | -1.28867600 | -0.49289300 |

IM7

|    |             |             |             |
|----|-------------|-------------|-------------|
| C  | -1.00997600 | -0.09619500 | 0.16226600  |
| C  | -2.35892400 | -0.22064000 | -0.02186600 |
| C  | -3.20922800 | 0.88484100  | -0.02161100 |
| C  | -2.66333400 | 2.17619000  | 0.14242100  |
| C  | -1.34106400 | 2.36462600  | 0.33626400  |
| C  | -0.39006000 | 1.23269900  | 0.43483700  |
| Cl | -3.04014600 | -1.78768700 | -0.28098100 |
| H  | -4.26486200 | 0.74178200  | -0.17720800 |
| H  | 0.05059500  | 1.20516400  | 1.44212500  |
| C  | 1.61482100  | -0.65410100 | 0.10212000  |
| C  | 2.74867300  | -1.42569200 | 0.32921300  |
| C  | 4.00823200  | -0.88474100 | 0.16911200  |
| C  | 4.14657100  | 0.44017000  | -0.21698600 |
| C  | 3.02683800  | 1.22196200  | -0.42038600 |
| C  | 1.76274000  | 0.68191600  | -0.25694200 |

|   |             |             |             |
|---|-------------|-------------|-------------|
| H | 2.63420000  | -2.45960100 | 0.61886700  |
| H | 3.10372600  | 2.25960100  | -0.70403800 |
| H | 5.12796700  | 0.86875700  | -0.34611900 |
| H | -0.91942600 | 3.35136500  | 0.44429400  |
| O | 0.69172600  | 1.48172100  | -0.46230600 |
| S | 0.05320100  | -1.45546400 | 0.14505100  |
| H | -3.32545000 | 3.02719600  | 0.10120200  |
| H | 4.87898600  | -1.49614300 | 0.34452800  |

IM8

|    |             |             |             |
|----|-------------|-------------|-------------|
| C  | -1.32359000 | 0.24017200  | -0.64552700 |
| C  | -1.62113500 | -0.83011000 | 0.19131700  |
| C  | -2.77390700 | -0.82848400 | 0.95612000  |
| C  | -3.65563700 | 0.23172500  | 0.87056200  |
| C  | -3.38353600 | 1.29331400  | 0.02504500  |
| C  | -2.22137500 | 1.29583300  | -0.72016400 |
| Cl | -0.57033000 | -2.19330000 | 0.30896800  |
| H  | -2.97467800 | -1.66515900 | 1.60541400  |
| C  | 1.46408700  | 1.02053400  | 0.59592500  |
| C  | 2.64911300  | 0.93908000  | 1.41161300  |
| C  | 3.72966200  | 0.20817000  | 1.02461100  |
| C  | 3.69457400  | -0.50704600 | -0.18296400 |
| C  | 2.56160300  | -0.50045900 | -0.98347800 |
| C  | 1.44391200  | 0.22419400  | -0.62034000 |
| H  | 2.63558400  | 1.50684500  | 2.32858200  |
| H  | -4.06521700 | 2.12633300  | -0.04163600 |
| H  | -1.97972200 | 2.13270100  | -1.35569800 |
| H  | 2.53998900  | -1.08802900 | -1.88859400 |
| H  | 4.55055300  | -1.09039500 | -0.48475500 |
| S  | 0.08506500  | 0.25997300  | -1.70995600 |
| H  | -4.55470200 | 0.22497000  | 1.46669900  |
| H  | 4.61511100  | 0.17287500  | 1.64022700  |
| O  | 0.52312700  | 1.76060900  | 0.91253400  |

IM9

|    |             |             |             |
|----|-------------|-------------|-------------|
| C  | -1.52398300 | 0.27371300  | 0.36298000  |
| C  | -2.76082600 | 0.12504800  | -0.24908500 |
| C  | -3.72478600 | -0.67928600 | 0.32648800  |
| C  | -3.46313100 | -1.33797800 | 1.51478500  |
| C  | -2.23279900 | -1.18343100 | 2.12704200  |
| C  | -1.26545600 | -0.37607600 | 1.55658500  |
| Cl | -3.08093300 | 0.93854000  | -1.72886500 |
| H  | -4.67647300 | -0.78536000 | -0.16872400 |



|      |             |             |             |
|------|-------------|-------------|-------------|
| H    | -0.30464400 | -0.25056600 | 2.03103500  |
| C    | 0.68069300  | 1.03359000  | 0.08477400  |
| C    | 1.24065700  | 2.11029100  | 0.73283500  |
| C    | 2.59533700  | 2.10314800  | 1.02067900  |
| C    | 3.38819700  | 1.02344700  | 0.66860600  |
| C    | 2.82578200  | -0.05074100 | 0.01255200  |
| C    | 1.45035100  | -0.08625500 | -0.32198500 |
| H    | 4.44090000  | 1.01325500  | 0.89704800  |
| Cl   | 3.85136200  | -1.35677200 | -0.41263000 |
| H    | -2.01896100 | -1.68951300 | 3.05522000  |
| H    | 0.60757000  | 2.93969300  | 1.00221600  |
| S    | 0.73996000  | -1.35738800 | -1.19194500 |
| H    | 3.03954400  | 2.94421600  | 1.52942100  |
| H    | -4.21950600 | -1.96713800 | 1.95571600  |
| O    | -0.63316300 | 1.11134200  | -0.23036400 |
| IM10 |             |             |             |
| C    | -1.45173600 | 0.16833700  | 0.28310300  |
| C    | -2.74732000 | 0.28005100  | -0.12362700 |
| C    | -3.60906800 | -0.82093200 | -0.07689100 |
| C    | -3.13343300 | -2.05253400 | 0.40876900  |
| C    | -1.85409500 | -2.20682600 | 0.82716800  |
| C    | -0.88053900 | -1.10014400 | 0.76060300  |
| Cl   | -3.33140500 | 1.78796200  | -0.71344000 |
| H    | -4.62550600 | -0.70860100 | -0.41296900 |
| H    | -0.37695000 | -0.95060700 | 1.71925300  |
| C    | 0.70588800  | 1.13582000  | 0.27626400  |
| C    | 1.38190900  | 2.30387500  | 0.58169500  |
| C    | 2.75884700  | 2.32929900  | 0.53251900  |
| C    | 3.46690900  | 1.19302700  | 0.18038200  |
| C    | 2.77949100  | 0.03120700  | -0.10359000 |
| C    | 1.38782000  | -0.03373700 | -0.05706400 |
| H    | 4.54291600  | 1.19764900  | 0.12953100  |
| Cl   | 3.67098900  | -1.37744800 | -0.54424700 |
| H    | -1.50234800 | -3.15043300 | 1.21301900  |
| H    | 0.80389400  | 3.17799900  | 0.83365600  |
| S    | 0.51738400  | -1.51298700 | -0.39357600 |
| H    | 3.28787500  | 3.23992700  | 0.76336700  |
| H    | -3.81454600 | -2.88777100 | 0.46080700  |
| O    | -0.64930800 | 1.24327800  | 0.25440300  |
| IM11 |             |             |             |
| C    | 1.30863700  | -0.03449700 | -0.51980700 |

|    |             |             |             |
|----|-------------|-------------|-------------|
| C  | 2.03567000  | 0.35221200  | 0.71919300  |
| C  | 3.34684600  | 0.05669200  | 0.92577100  |
| C  | 4.10373800  | -0.55319000 | -0.07988100 |
| C  | 3.51917900  | -0.82274700 | -1.33390900 |
| C  | 2.21719300  | -0.54682800 | -1.56953200 |
| Cl | 1.11398400  | 1.14910500  | 1.91975200  |
| H  | 3.80023800  | 0.31504700  | 1.86938400  |
| H  | 1.75725200  | -0.72634300 | -2.52806800 |
| C  | -1.22707700 | -0.20369400 | -0.26096400 |
| C  | -2.56899600 | -0.34516500 | 0.01840800  |
| C  | -3.43819800 | 0.71607600  | -0.18678500 |
| C  | -2.94718500 | 1.91238400  | -0.67429900 |
| C  | -1.59874800 | 2.07471200  | -0.96330600 |
| C  | -0.76116000 | 1.00681900  | -0.74990200 |
| H  | -1.20481400 | 3.00372000  | -1.34048900 |
| H  | 4.12520500  | -1.23762000 | -2.12413100 |
| H  | -4.48471100 | 0.59369600  | 0.03801100  |
| Cl | -3.15407200 | -1.85270000 | 0.61269200  |
| S  | 0.04734800  | -1.37750000 | -0.11956800 |
| H  | 5.14205100  | -0.78078400 | 0.09701600  |
| H  | -3.62500000 | 2.73649600  | -0.83000700 |
| O  | 0.55928800  | 1.05253100  | -1.03376400 |

IM12

|   |             |             |             |
|---|-------------|-------------|-------------|
| C | -1.34696500 | -0.22153800 | 0.49114300  |
| C | -1.28293500 | 0.65237600  | 1.56804200  |
| C | -2.37964800 | 1.40792200  | 1.92965100  |
| C | -3.56704700 | 1.27429500  | 1.22983500  |
| C | -3.65248600 | 0.38803800  | 0.17407400  |
| C | -2.54594600 | -0.35660400 | -0.19548200 |
| H | -2.31030100 | 2.08987300  | 2.76235600  |
| C | 1.00628300  | 1.21919200  | -0.87032800 |
| C | 2.08592400  | 2.15784000  | -1.03628000 |
| C | 3.35094700  | 1.85417500  | -0.64276300 |
| C | 3.62434800  | 0.61573400  | -0.04569000 |
| C | 2.60922700  | -0.30239300 | 0.17775900  |
| C | 1.29382100  | -0.03164700 | -0.16683900 |
| H | -4.57035400 | 0.27237000  | -0.37896900 |
| H | 4.15768200  | 2.55449400  | -0.79094500 |
| H | -4.43218500 | 1.85583000  | 1.50718500  |
| H | 4.62701300  | 0.36451500  | 0.25976200  |
| O | -0.11309300 | 1.45422500  | -1.33376200 |
| S | 0.05821600  | -1.21704000 | 0.09251100  |

|      |             |             |             |
|------|-------------|-------------|-------------|
| H    | -0.35796300 | 0.73554000  | 2.11795000  |
| H    | 1.83608700  | 3.09063900  | -1.51553700 |
| Cl   | -2.68870200 | -1.43574000 | -1.52934900 |
| Cl   | 3.03282800  | -1.80360000 | 0.91460600  |
| IM13 |             |             |             |
| C    | -1.33405400 | -0.05739200 | 0.14273000  |
| C    | -2.61528200 | -0.48630400 | -0.06244600 |
| C    | -3.70590200 | 0.37808300  | 0.03012700  |
| C    | -3.48536400 | 1.74227800  | 0.31601300  |
| C    | -2.24408200 | 2.22734400  | 0.53053900  |
| C    | -1.04690700 | 1.35407800  | 0.52407900  |
| Cl   | -2.90892200 | -2.14240300 | -0.45679600 |
| H    | -4.69828700 | -0.00082900 | -0.14478700 |
| H    | -0.58148600 | 1.35530700  | 1.51993300  |
| C    | 1.33144200  | 0.02382000  | -0.01590900 |
| C    | 2.63872100  | -0.44884700 | 0.07757900  |
| C    | 3.72662400  | 0.37960000  | -0.10036100 |
| C    | 3.51645100  | 1.71790200  | -0.38118700 |
| C    | 2.23370900  | 2.22028500  | -0.46047900 |
| C    | 1.14849800  | 1.38300600  | -0.27242500 |
| H    | 2.04216600  | 3.26154400  | -0.66308100 |
| H    | 4.36050500  | 2.37299300  | -0.52650000 |
| H    | -2.07176000 | 3.27257000  | 0.73267300  |
| O    | -0.08479900 | 1.92468700  | -0.36413300 |
| S    | 0.01390600  | -1.13175300 | 0.05238100  |
| H    | 4.72074100  | -0.02799800 | -0.02373700 |
| H    | -4.33420300 | 2.40729800  | 0.35366600  |
| Cl   | 2.91098700  | -2.12427000 | 0.38957600  |
| IM14 |             |             |             |
| C    | -1.57846600 | -0.60616200 | 0.36116000  |
| C    | -2.53158700 | -0.80820800 | 1.34820300  |
| C    | -3.83364600 | -0.38010400 | 1.17357900  |
| C    | -4.19361000 | 0.26761900  | 0.00579500  |
| C    | -3.25592700 | 0.47224500  | -0.98918000 |
| C    | -1.95968400 | 0.02475800  | -0.81839300 |
| H    | -4.55949300 | -0.54181300 | 1.95462800  |
| C    | 0.81181700  | 1.34963700  | 0.76399200  |
| C    | 1.82448800  | 2.35157300  | 0.55648600  |
| C    | 3.07833600  | 2.01672500  | 0.15324300  |
| C    | 3.40382600  | 0.67409800  | -0.08408100 |
| C    | 2.44951200  | -0.32034900 | 0.06160600  |

|      |             |             |             |
|------|-------------|-------------|-------------|
| C    | 1.14733800  | -0.03364700 | 0.43804300  |
| H    | 1.53438300  | 3.36872300  | 0.76488100  |
| H    | -3.52202600 | 0.97182800  | -1.90651300 |
| Cl   | -0.82890600 | 0.28550700  | -2.09339300 |
| H    | -2.23406800 | -1.29168000 | 2.26518800  |
| H    | 4.39807800  | 0.39743200  | -0.39504000 |
| Cl   | 2.93078800  | -1.94801200 | -0.25000800 |
| S    | 0.01133700  | -1.33215500 | 0.60163000  |
| H    | -5.20459800 | 0.61545800  | -0.13686600 |
| H    | 3.83522500  | 2.77309000  | 0.01840600  |
| O    | -0.29190900 | 1.65436700  | 1.22804100  |
| IM15 |             |             |             |
| C    | -1.27956900 | -0.29355900 | -0.64090100 |
| C    | -1.90922000 | 0.86895300  | -0.19705600 |
| C    | -3.16960900 | 0.81544600  | 0.36952400  |
| C    | -3.81390700 | -0.39987100 | 0.49969600  |
| C    | -3.20949500 | -1.56256400 | 0.05536700  |
| C    | -1.95407900 | -1.50349800 | -0.51570000 |
| Cl   | -1.15447200 | 2.41091700  | -0.34540600 |
| H    | -3.63409300 | 1.72713400  | 0.70774700  |
| H    | -1.47502500 | -2.39813600 | -0.87874400 |
| C    | 1.45063000  | -0.71915700 | -0.05845500 |
| C    | 2.79023700  | -0.62567800 | -0.69545900 |
| C    | 3.55029400  | 0.45792700  | -0.54667700 |
| C    | 3.12860700  | 1.56186500  | 0.28851300  |
| C    | 2.00664300  | 1.50691000  | 1.01491600  |
| C    | 1.19094200  | 0.29596700  | 1.04893900  |
| Cl   | 1.18363900  | -2.36332400 | 0.55444500  |
| H    | 3.08556600  | -1.45314300 | -1.32102400 |
| H    | 1.70310700  | 2.30018100  | 1.67867800  |
| H    | 3.75522700  | 2.44001800  | 0.33226400  |
| H    | -3.71406300 | -2.51106800 | 0.14789300  |
| H    | -4.79577200 | -0.43312600 | 0.94564500  |
| H    | 4.50125900  | 0.52101600  | -1.05178000 |
| O    | 0.32746400  | 0.11457700  | 1.86943600  |
| S    | 0.29808800  | -0.27093900 | -1.42537900 |
| IM16 |             |             |             |
| C    | -1.87358400 | -0.56219400 | -0.34652600 |
| C    | -2.70740300 | 0.55126500  | -0.26704200 |
| C    | -3.98580300 | 0.44243300  | 0.25695900  |
| C    | -4.44365500 | -0.77861800 | 0.71180500  |

|    |             |             |             |
|----|-------------|-------------|-------------|
| C  | -3.63069400 | -1.89730000 | 0.63993200  |
| C  | -2.36190500 | -1.78448600 | 0.10738500  |
| Cl | -2.18765900 | 2.10258600  | -0.80889300 |
| H  | -4.61100300 | 1.31922300  | 0.30395400  |
| H  | -1.72367700 | -2.65124200 | 0.02388400  |
| C  | 0.72843600  | -0.46174900 | 0.51108700  |
| C  | 0.57105600  | 0.85863700  | 1.15984100  |
| C  | 1.58846600  | 1.71496500  | 1.25376700  |
| C  | 2.89802400  | 1.37501300  | 0.75144500  |
| C  | 3.16609900  | 0.17773300  | 0.20996600  |
| C  | 2.14110600  | -0.86722000 | 0.13016500  |
| H  | 3.68817800  | 2.10691300  | 0.82230200  |
| H  | 0.33382600  | -1.26463700 | 1.13075600  |
| Cl | 4.72930700  | -0.23368900 | -0.35401300 |
| H  | -3.98672700 | -2.85521700 | 0.98457600  |
| H  | -0.41301500 | 1.11804600  | 1.52014200  |
| H  | -5.44039200 | -0.85404800 | 1.11781900  |
| H  | 1.45080100  | 2.68775300  | 1.69817500  |
| O  | 2.37741500  | -1.99463100 | -0.22149000 |
| S  | -0.25413700 | -0.50199200 | -1.04831300 |

IM17

|    |             |             |             |
|----|-------------|-------------|-------------|
| C  | -0.90696400 | -0.44814200 | 0.23950700  |
| C  | -1.59045800 | 0.83668500  | -0.06935100 |
| C  | -2.94244900 | 0.94637200  | -0.16747900 |
| C  | -3.76555200 | -0.14767500 | 0.11934200  |
| C  | -3.19591600 | -1.35868100 | 0.56144700  |
| C  | -1.85555900 | -1.50096500 | 0.66580200  |
| Cl | -0.57516000 | 2.18043500  | -0.36994900 |
| H  | -3.37290100 | 1.89284300  | -0.45326300 |
| H  | -1.40121300 | -2.41137900 | 1.02240900  |
| C  | 1.51960000  | -0.55544000 | -0.58031200 |
| C  | 2.77241400  | -0.51590000 | -1.15665400 |
| C  | 3.85224600  | -0.10872200 | -0.38437800 |
| C  | 3.67127200  | 0.25378800  | 0.93862500  |
| C  | 2.40986800  | 0.22123400  | 1.51855500  |
| C  | 1.34973500  | -0.18436800 | 0.74290100  |
| H  | 2.90980600  | -0.79700600 | -2.18865400 |
| H  | 2.24773900  | 0.50689500  | 2.54509500  |
| H  | -3.84004000 | -2.17807900 | 0.84013900  |
| H  | 4.51550500  | 0.57193300  | 1.52988300  |
| H  | -4.83531000 | -0.04737300 | 0.03671000  |
| H  | 4.83623000  | -0.07307200 | -0.82436500 |

|      |             |             |             |
|------|-------------|-------------|-------------|
| O    | 0.08859400  | -0.27631900 | 1.22976200  |
| S    | 0.00623400  | -1.05942100 | -1.28905900 |
| IM18 |             |             |             |
| C    | -1.19350500 | 0.00389500  | -0.77646000 |
| C    | -1.55175600 | -0.83440800 | 0.26927700  |
| C    | -2.82742500 | -0.76518000 | 0.80229000  |
| C    | -3.75827300 | 0.10613500  | 0.27125800  |
| C    | -3.41341700 | 0.90872400  | -0.80389600 |
| C    | -2.13713800 | 0.85442800  | -1.32307700 |
| Cl   | -0.43278000 | -1.97529200 | 0.91621800  |
| H    | -3.08084100 | -1.41344200 | 1.62563600  |
| C    | 1.50256200  | 0.84849200  | 0.32921700  |
| C    | 2.81156500  | 0.78737900  | 0.85720600  |
| C    | 3.78470300  | -0.00479400 | 0.30530700  |
| C    | 3.47785900  | -0.78210700 | -0.80937200 |
| C    | 2.20362300  | -0.77654300 | -1.33666700 |
| C    | 1.21330700  | 0.00545600  | -0.76879800 |
| H    | 3.02433900  | 1.41515500  | 1.70798300  |
| H    | -4.13628300 | 1.58413300  | -1.23333900 |
| H    | -1.83404800 | 1.48087500  | -2.14625100 |
| H    | 1.94259600  | -1.38854200 | -2.18477600 |
| H    | 4.23505100  | -1.40453100 | -1.26060900 |
| H    | -4.75055100 | 0.14769600  | 0.69118500  |
| H    | 4.77806300  | -0.01836000 | 0.72431900  |
| O    | 0.01826700  | -0.04935800 | -1.39860400 |
| S    | 0.39751000  | 1.96643700  | 0.97445400  |
| IM19 |             |             |             |
| C    | 1.56030500  | -0.18899200 | 0.44609800  |
| C    | 2.76101100  | 0.06317700  | -0.20508300 |
| C    | 3.51007800  | 1.18529700  | 0.10332500  |
| C    | 3.06425700  | 2.06923700  | 1.06575600  |
| C    | 1.87512200  | 1.82190800  | 1.73162600  |
| C    | 1.13908200  | 0.69511600  | 1.43095800  |
| Cl   | 3.35403000  | -1.02049600 | -1.40856300 |
| H    | 4.43537300  | 1.35675600  | -0.42233600 |
| H    | 0.22090500  | 0.49259200  | 1.96086300  |
| C    | -1.00176000 | -1.13102600 | 0.27836600  |
| C    | -1.87554300 | -1.92118600 | 0.98879000  |
| C    | -3.22480700 | -1.58993300 | 1.07538100  |
| C    | -3.73197800 | -0.44322200 | 0.46223200  |
| C    | -2.89544400 | 0.36168100  | -0.25829000 |

|      |             |             |             |
|------|-------------|-------------|-------------|
| C    | -1.48494600 | 0.04988000  | -0.43190000 |
| H    | -4.77519900 | -0.18800400 | 0.55440500  |
| Cl   | -3.47887400 | 1.76796500  | -1.02278100 |
| H    | 1.52438100  | 2.50211800  | 2.49160300  |
| H    | -1.50407700 | -2.79606200 | 1.49905100  |
| H    | -3.88946400 | -2.21862200 | 1.64673300  |
| H    | 3.64866300  | 2.94589200  | 1.29611900  |
| O    | -0.75805300 | 0.73248000  | -1.14893400 |
| S    | 0.64712100  | -1.65581800 | 0.08589600  |
| IM20 |             |             |             |
| C    | 1.45942600  | -0.11657400 | 0.19338600  |
| C    | 2.78506700  | 0.09180100  | -0.06214400 |
| C    | 3.35837500  | 1.36203400  | 0.00643900  |
| C    | 2.54395000  | 2.47249900  | 0.31525000  |
| C    | 1.22735600  | 2.33160500  | 0.57890900  |
| C    | 0.56966800  | 1.00460000  | 0.60775600  |
| Cl   | 3.78919400  | -1.24419200 | -0.50000700 |
| H    | 4.40663500  | 1.48260600  | -0.20749200 |
| H    | 0.19704000  | 0.79691400  | 1.62070700  |
| C    | -0.96812700 | -1.26603000 | 0.16400400  |
| C    | -1.87422400 | -2.30200400 | 0.35111900  |
| C    | -3.23005600 | -2.06243600 | 0.26766900  |
| C    | -3.69610500 | -0.78603700 | 0.00397300  |
| C    | -2.79739400 | 0.24922200  | -0.15671800 |
| C    | -1.42747300 | 0.02639000  | -0.07323600 |
| H    | -4.75186100 | -0.58111000 | -0.06402200 |
| Cl   | -3.36600300 | 1.84416800  | -0.45820000 |
| H    | 0.59754800  | 3.17965100  | 0.79565600  |
| H    | -1.50679200 | -3.29803400 | 0.54571800  |
| H    | -3.92937900 | -2.87087700 | 0.40780900  |
| H    | 2.99036300  | 3.45463900  | 0.32863900  |
| O    | -0.58585900 | 1.06292200  | -0.23265200 |
| S    | 0.73664400  | -1.68107300 | 0.09658000  |
| IM21 |             |             |             |
| C    | 1.18911900  | 0.06514400  | -0.47983300 |
| C    | 1.85483400  | -0.22542800 | 0.81727100  |
| C    | 3.19104500  | -0.45686400 | 0.92145600  |
| C    | 3.99108600  | -0.52855400 | -0.22344400 |
| C    | 3.40361200  | -0.40803500 | -1.49894800 |
| C    | 2.07989100  | -0.17089900 | -1.63673100 |
| Cl   | 0.86081600  | -0.18756200 | 2.20887200  |

|    |             |             |             |
|----|-------------|-------------|-------------|
| H  | 3.62297000  | -0.60290100 | 1.89861100  |
| H  | 1.60682000  | -0.09954700 | -2.60292700 |
| C  | -1.12613800 | -0.02728800 | -0.35006200 |
| C  | -2.34661500 | -0.64904300 | -0.20420100 |
| C  | -3.46981300 | 0.12085800  | 0.06149400  |
| C  | -3.35864900 | 1.49309100  | 0.17829100  |
| C  | -2.13016500 | 2.12266300  | 0.03007000  |
| C  | -1.02098200 | 1.34960100  | -0.23929500 |
| H  | -2.04421500 | 3.19311000  | 0.12297100  |
| H  | 4.01520000  | -0.52805500 | -2.37948700 |
| H  | -4.42190900 | -0.36995200 | 0.17974900  |
| Cl | -2.45898600 | -2.35740800 | -0.35099900 |
| H  | 5.04801700  | -0.71439600 | -0.12602700 |
| H  | -4.23743300 | 2.08071200  | 0.39058900  |
| O  | 0.00572000  | -0.69990000 | -0.63472200 |
| S  | 0.62439600  | 1.86207900  | -0.51537300 |

IM22

|    |             |             |             |
|----|-------------|-------------|-------------|
| C  | 1.12669600  | 0.17028500  | 0.24829000  |
| C  | 0.97825300  | -0.12033300 | 1.59187800  |
| C  | 2.09517000  | -0.34174400 | 2.37700000  |
| C  | 3.36143800  | -0.26649800 | 1.82602500  |
| C  | 3.50840500  | 0.03287200  | 0.48326900  |
| C  | 2.39630800  | 0.25141100  | -0.30581500 |
| H  | 1.96909800  | -0.56951400 | 3.42368700  |
| C  | -1.51645900 | -1.34412800 | -0.27405400 |
| C  | -2.84655000 | -1.69536500 | 0.01103900  |
| C  | -3.78995200 | -0.73565300 | 0.29956200  |
| C  | -3.43061700 | 0.60300300  | 0.32284200  |
| C  | -2.12130000 | 0.97721900  | 0.06021000  |
| C  | -1.16343800 | 0.02377100  | -0.23657700 |
| H  | -3.10727300 | -2.74099000 | -0.01799400 |
| H  | 4.48576500  | 0.09600100  | 0.03284700  |
| Cl | 2.57706600  | 0.61477700  | -1.97542100 |
| H  | -0.01219000 | -0.17197800 | 2.01684500  |
| H  | -4.15641000 | 1.36796100  | 0.54712600  |
| Cl | -1.68410100 | 2.63709000  | 0.10377800  |
| H  | 4.23452000  | -0.43858900 | 2.43471400  |
| H  | -4.80959700 | -1.01861400 | 0.50612500  |
| O  | 0.07431800  | 0.43444700  | -0.57177100 |
| S  | -0.37291100 | -2.53816400 | -0.68582800 |

IM23



|      |             |             |             |
|------|-------------|-------------|-------------|
| C    | -1.14925900 | 0.10543600  | -0.19029700 |
| C    | -2.28356100 | 0.79574500  | 0.11775500  |
| C    | -3.54263200 | 0.21335300  | -0.05760500 |
| C    | -3.63688400 | -1.09566500 | -0.56432500 |
| C    | -2.53522000 | -1.81619200 | -0.88448100 |
| C    | -1.17558400 | -1.27919900 | -0.68719200 |
| Cl   | -2.16964700 | 2.39547300  | 0.73869300  |
| H    | -4.42309400 | 0.77750600  | 0.19799300  |
| H    | -0.57290200 | -1.36816600 | -1.59492200 |
| C    | 1.26296100  | -1.36743200 | 0.31607200  |
| C    | 2.50373600  | -1.98139700 | 0.42274100  |
| C    | 3.66392300  | -1.25455800 | 0.24975200  |
| C    | 3.60026500  | 0.09296200  | -0.06023600 |
| C    | 2.37265100  | 0.70922400  | -0.18223200 |
| C    | 1.19732600  | -0.00908200 | 0.01603600  |
| H    | 2.54469300  | -3.03724700 | 0.63994100  |
| H    | -2.61783900 | -2.81260700 | -1.28856000 |
| H    | 4.49522500  | 0.67331300  | -0.21282700 |
| Cl   | 2.28517400  | 2.38280900  | -0.56089200 |
| H    | 4.62258600  | -1.73946600 | 0.34062800  |
| H    | -4.61540500 | -1.52500000 | -0.71409900 |
| O    | 0.04523000  | 0.69781500  | -0.03105000 |
| S    | -0.21408700 | -2.27880100 | 0.55510500  |
| IM24 |             |             |             |
| C    | -1.34821300 | -0.32373500 | 0.57716400  |
| C    | -2.32579300 | -0.09504800 | 1.52787400  |
| C    | -3.65229400 | -0.02361600 | 1.15931800  |
| C    | -4.01165100 | -0.18009600 | -0.16999000 |
| C    | -3.04031500 | -0.43397600 | -1.11778800 |
| C    | -1.70966300 | -0.52701900 | -0.74603200 |
| H    | -4.40490200 | 0.16385600  | 1.90862500  |
| C    | 1.04923300  | 1.48823100  | 0.08741500  |
| C    | 2.24631900  | 1.97852600  | -0.47140000 |
| C    | 3.35818200  | 1.18476300  | -0.59792800 |
| C    | 3.30846300  | -0.13843100 | -0.17850900 |
| C    | 2.14108900  | -0.65850900 | 0.34556400  |
| C    | 1.00159000  | 0.12660600  | 0.46572900  |
| H    | 2.26280200  | 3.01280900  | -0.77487500 |
| H    | -3.30082100 | -0.58157500 | -2.15342400 |
| Cl   | -0.52895400 | -0.92167400 | -1.93770600 |
| H    | -2.01277300 | 0.04321900  | 2.54989800  |
| H    | 4.16984500  | -0.78061100 | -0.26730400 |

|    |             |             |             |
|----|-------------|-------------|-------------|
| Cl | 2.08820500  | -2.30765600 | 0.82335100  |
| H  | -5.04543700 | -0.11550600 | -0.46958500 |
| H  | 4.26951400  | 1.58143200  | -1.01534000 |
| O  | -0.06862200 | -0.45735500 | 1.03207300  |
| S  | -0.24988700 | 2.55297700  | 0.35130900  |

IM25

|    |             |             |             |
|----|-------------|-------------|-------------|
| C  | 1.61366900  | 0.07346300  | 2.23452300  |
| C  | 2.93756500  | 0.02690200  | 1.65890200  |
| C  | 3.13629500  | -0.10921700 | 0.33903300  |
| C  | 2.00256600  | -0.15649100 | -0.59119800 |
| C  | 0.65136200  | -0.41888500 | 0.03130800  |
| C  | 0.53181000  | -0.09943000 | 1.47484700  |
| H  | 3.79259200  | 0.13007900  | 2.30970000  |
| H  | 0.53644500  | -1.51230300 | -0.04705400 |
| Cl | 4.70333500  | -0.08880600 | -0.35030000 |
| H  | -3.45003300 | 2.41841100  | 0.32055600  |
| C  | -2.64146900 | 1.78567100  | -0.01168900 |
| C  | -1.41921800 | 2.39502600  | -0.45431300 |
| C  | -2.82683300 | 0.44790400  | -0.00911400 |
| C  | -0.40336300 | 1.63182500  | -0.85896200 |
| C  | -1.80026000 | -0.46610000 | -0.44585100 |
| Cl | -4.33765900 | -0.17863800 | 0.51817500  |
| C  | -0.48028100 | 0.15116300  | -0.84665100 |
| H  | -0.24982400 | -0.19960000 | -1.85470800 |
| H  | -0.45922100 | -0.08353800 | 1.90567200  |
| H  | 0.52068400  | 2.06379900  | -1.21388600 |
| S  | -1.99522900 | -2.08421500 | -0.49711900 |
| O  | 2.12892900  | -0.02653100 | -1.78501600 |
| H  | 1.52453900  | 0.24735500  | 3.29498600  |
| H  | -1.35050200 | 3.47106600  | -0.46012300 |

IM26

|   |             |             |             |
|---|-------------|-------------|-------------|
| C | 0.46271900  | 1.52554700  | 0.71081500  |
| C | 1.61481600  | 2.25616100  | 0.95580000  |
| C | 2.86029100  | 1.73613500  | 0.65102000  |
| C | 2.95077100  | 0.47809600  | 0.09831700  |
| C | 1.79583000  | -0.30090700 | -0.17190200 |
| C | 0.53232200  | 0.26796900  | 0.15313300  |
| H | 3.75811800  | 2.30133300  | 0.83860300  |
| C | -0.72539100 | -0.53507800 | -0.05400000 |
| C | -1.90122300 | 0.30115000  | -0.51182200 |
| C | -0.98097100 | -1.44669200 | 1.09629000  |

|      |             |             |             |
|------|-------------|-------------|-------------|
| C    | -3.22052800 | -0.10354100 | -0.01551700 |
| C    | -2.21283900 | -1.67378200 | 1.55062900  |
| H    | -0.12539100 | -1.95416500 | 1.51584100  |
| C    | -3.35230000 | -1.00987300 | 0.96475200  |
| H    | -4.33892700 | -1.24193800 | 1.33580600  |
| H    | -0.54039100 | -1.20138000 | -0.90806300 |
| H    | -0.49790300 | 1.95730900  | 0.93943100  |
| Cl   | 4.51595700  | -0.12134200 | -0.26402800 |
| Cl   | -4.57454200 | 0.71237600  | -0.67529800 |
| S    | 1.91725800  | -1.84626500 | -0.86590400 |
| H    | -2.38526000 | -2.36547400 | 2.35988700  |
| H    | 1.54162500  | 3.24302300  | 1.38560100  |
| O    | -1.75412700 | 1.22285600  | -1.27614800 |
| IM27 |             |             |             |
| C    | 2.73369600  | 1.65896700  | 1.44523100  |
| C    | 3.54506700  | 0.73813100  | 0.80933400  |
| C    | 3.00315900  | -0.14112800 | -0.10530500 |
| C    | 1.64280300  | -0.10576400 | -0.39253300 |
| C    | 0.80643700  | 0.81261300  | 0.25210800  |
| C    | 1.38092800  | 1.68889400  | 1.16120700  |
| H    | 4.60322000  | 0.68923600  | 1.01100000  |
| H    | 0.14786400  | -1.22632700 | 1.36264400  |
| Cl   | 3.98234600  | -1.29171700 | -0.93061200 |
| H    | -4.34557200 | 1.23668600  | -1.08119500 |
| C    | -3.30611500 | 1.15941900  | -0.80688300 |
| C    | -2.41637200 | 2.17992100  | -1.07681400 |
| C    | -2.86181900 | 0.01963900  | -0.16736200 |
| C    | -1.09020000 | 2.03694800  | -0.71921500 |
| C    | -1.53152000 | -0.14195400 | 0.21541900  |
| Cl   | -4.00143200 | -1.22934300 | 0.17722000  |
| C    | -0.63114300 | 0.88829500  | -0.08844200 |
| H    | 0.73487300  | 2.39817500  | 1.65595400  |
| H    | -0.37976400 | 2.81766500  | -0.94362800 |
| S    | -1.10096200 | -1.60541100 | 1.08210700  |
| H    | 3.15575500  | 2.34540400  | 2.16075800  |
| H    | -2.75468600 | 3.07542200  | -1.57274800 |
| O    | 1.14108000  | -0.94444300 | -1.28241400 |
| IM28 |             |             |             |
| C    | 3.20399600  | 1.86459200  | -0.16973500 |
| C    | 3.52184400  | 0.51143100  | -0.20225700 |
| C    | 2.52876600  | -0.45489800 | -0.16851000 |

|      |             |             |             |
|------|-------------|-------------|-------------|
| C    | 1.21909200  | -0.03336600 | -0.09735100 |
| C    | 0.89003400  | 1.32415700  | -0.06319600 |
| C    | 1.88986000  | 2.28627400  | -0.10531600 |
| H    | 4.55078200  | 0.19372500  | -0.25319200 |
| H    | -0.12581500 | 0.33291000  | 2.41570300  |
| Cl   | 2.90503500  | -2.12799600 | -0.22310800 |
| H    | -4.08651400 | 0.30942300  | -1.13944000 |
| C    | -3.11204300 | 0.58470100  | -0.76888200 |
| C    | -2.76321000 | 1.95023400  | -0.66863700 |
| C    | -2.22861200 | -0.39216300 | -0.44746600 |
| C    | -1.45748500 | 2.33497700  | -0.38271300 |
| C    | -0.96602600 | -0.02734400 | 0.22323100  |
| Cl   | -2.58952400 | -2.05163700 | -0.61229200 |
| C    | -0.54031600 | 1.36735500  | -0.06815100 |
| H    | 1.64579500  | 3.33655000  | -0.08380500 |
| H    | -1.15433200 | 3.36403600  | -0.49727700 |
| S    | -1.30957700 | -0.18252100 | 2.06588600  |
| H    | 4.00223800  | 2.58890600  | -0.19513600 |
| H    | -3.50091700 | 2.69401900  | -0.92215000 |
| O    | 0.14286400  | -0.84264600 | -0.08289800 |
| IM29 |             |             |             |
| C    | -0.51151100 | -1.00926900 | 0.98061700  |
| C    | -1.63110600 | -1.61691700 | 1.55839400  |
| C    | -2.92576900 | -1.26217600 | 1.18979600  |
| C    | -3.11214800 | -0.29029400 | 0.24387300  |
| C    | -1.98839300 | 0.38034700  | -0.37954400 |
| C    | -0.66182100 | -0.03998900 | 0.02975200  |
| H    | -3.77746000 | -1.74545800 | 1.64006000  |
| C    | 0.48698900  | 0.69380400  | -0.62491100 |
| C    | 1.75257000  | -0.13152700 | -0.62929500 |
| C    | 0.55996200  | 2.03082700  | 0.03235300  |
| C    | 2.81649400  | 0.33183500  | 0.22694200  |
| C    | 1.62508800  | 2.40055600  | 0.74444500  |
| H    | -0.30367800 | 2.66765000  | -0.08270400 |
| C    | 2.75292600  | 1.51986100  | 0.86509900  |
| H    | 3.59180800  | 1.82591900  | 1.47097400  |
| H    | 0.18624400  | 0.84744300  | -1.66243600 |
| H    | 0.47432200  | -1.32924100 | 1.28015800  |
| Cl   | -4.67512900 | 0.17448700  | -0.24320200 |
| Cl   | 4.22741400  | -0.63328600 | 0.40636000  |
| H    | 1.66379400  | 3.36023100  | 1.23464000  |
| H    | -1.48935500 | -2.38405700 | 2.30343100  |

|      |             |             |             |
|------|-------------|-------------|-------------|
| O    | -2.14431900 | 1.27136100  | -1.22169000 |
| S    | 1.84002200  | -1.47851000 | -1.53808900 |
| IM30 |             |             |             |
| C    | -2.50653400 | 2.10130500  | -1.11953000 |
| C    | -3.35595000 | 1.05606500  | -0.80317300 |
| C    | -2.86126300 | -0.04870200 | -0.14015600 |
| C    | -1.52232200 | -0.12790700 | 0.22664900  |
| C    | -0.66727000 | 0.92975000  | -0.10007900 |
| C    | -1.16830800 | 2.03302700  | -0.77330000 |
| H    | -4.40123200 | 1.08948800  | -1.06539300 |
| H    | 0.24344600  | -0.56204800 | -1.65883700 |
| Cl   | -3.91270400 | -1.35079700 | 0.27545200  |
| H    | 0.60897600  | 2.18084100  | 1.91366700  |
| C    | 1.27325800  | 1.54042100  | 1.35433500  |
| C    | 2.60215100  | 1.42747600  | 1.70808500  |
| C    | 0.75884900  | 0.82184600  | 0.28266500  |
| C    | 3.43396800  | 0.58957900  | 0.98456100  |
| C    | 1.60111700  | -0.01656200 | -0.45460900 |
| C    | 2.93944900  | -0.12426400 | -0.08702300 |
| H    | -0.49480600 | 2.83796700  | -1.02481500 |
| H    | 4.47504900  | 0.48352900  | 1.24374500  |
| H    | 2.99370600  | 1.98220600  | 2.54524800  |
| H    | -2.89021700 | 2.96409200  | -1.63984500 |
| O    | 1.18155900  | -0.70469300 | -1.52207400 |
| S    | -0.89229700 | -1.49454000 | 1.10146900  |
| Cl   | 3.97896900  | -1.15026700 | -0.99493600 |
| IM31 |             |             |             |
| C    | 3.10185400  | 2.01780100  | 0.09570300  |
| C    | 3.56265400  | 0.71678700  | -0.03859400 |
| C    | 2.66218300  | -0.33301900 | -0.10811800 |
| C    | 1.30442500  | -0.08882500 | -0.03858000 |
| C    | 0.84194400  | 1.22923000  | 0.08826100  |
| C    | 1.74671800  | 2.28096900  | 0.15511100  |
| H    | 4.61897100  | 0.50779400  | -0.08808100 |
| H    | -0.49689500 | -0.13290600 | 2.23960700  |
| Cl   | 3.23344700  | -1.94787500 | -0.29157200 |
| H    | -4.31166400 | 0.65904700  | -0.86680000 |
| C    | -3.29322400 | 0.81999800  | -0.55159900 |
| C    | -2.74338900 | 2.11943400  | -0.58362900 |
| C    | -2.54902600 | -0.23443900 | -0.15029400 |
| C    | -1.39196200 | 2.32775800  | -0.31595100 |

|      |             |             |             |
|------|-------------|-------------|-------------|
| C    | -1.19197700 | -0.04574200 | 0.42853200  |
| Cl   | -3.18629700 | -1.82158200 | -0.11241000 |
| C    | -0.59467500 | 1.28185100  | 0.05567800  |
| H    | 1.38958300  | 3.29374200  | 0.26116100  |
| H    | -0.95706700 | 3.30055600  | -0.49049400 |
| H    | 3.81250800  | 2.82667600  | 0.15504200  |
| H    | -3.36510200 | 2.94315500  | -0.89456600 |
| S    | 0.04052100  | -1.29339800 | -0.13973200 |
| O    | -1.35917200 | -0.14672000 | 1.82105300  |
| IM32 |             |             |             |
| C    | -1.34654900 | 1.66683000  | 1.20346300  |
| C    | -2.69395100 | 1.63376400  | 1.50521900  |
| C    | -3.51690400 | 0.73171700  | 0.85527700  |
| C    | -2.99308900 | -0.12654500 | -0.09068000 |
| C    | -1.63743600 | -0.09845600 | -0.40383100 |
| C    | -0.80330100 | 0.80451400  | 0.25998700  |
| H    | -4.57168000 | 0.68453400  | 1.07311400  |
| C    | 0.63261600  | 0.88552200  | -0.09234800 |
| C    | 1.54050100  | -0.13680600 | 0.22415200  |
| C    | 1.08926400  | 2.02553700  | -0.74324400 |
| C    | 2.87240300  | 0.02410300  | -0.15760400 |
| C    | 2.41579200  | 2.16944300  | -1.09839900 |
| H    | 0.37559100  | 2.80042800  | -0.97691800 |
| C    | 3.31128000  | 1.15775100  | -0.81108700 |
| H    | 4.35100100  | 1.23779100  | -1.08369300 |
| H    | -0.15037200 | -1.20851000 | 1.35753200  |
| H    | -0.69011300 | 2.36050100  | 1.70615200  |
| Cl   | -4.01858300 | -1.23833200 | -0.90910400 |
| Cl   | 4.01495200  | -1.21613900 | 0.20425400  |
| H    | -0.24186100 | -0.83693600 | -1.45553300 |
| S    | 1.10111200  | -1.59682200 | 1.09506300  |
| O    | -1.18738500 | -0.94362900 | -1.33787500 |
| H    | -3.10488600 | 2.30255300  | 2.24402500  |
| H    | 2.75159500  | 3.05956700  | -1.60565500 |
| IM33 |             |             |             |
| C    | -1.10104900 | 1.84189100  | -1.50235000 |
| C    | -2.32227700 | 1.50522400  | -0.80413300 |
| C    | -2.51613200 | 0.28777500  | -0.28197200 |
| C    | -1.50461700 | -0.77318600 | -0.43804600 |
| C    | -0.12079600 | -0.33443600 | -0.87865700 |
| C    | -0.07946600 | 0.98926300  | -1.56186800 |

|    |             |             |             |
|----|-------------|-------------|-------------|
| H  | -3.10424600 | 2.24542500  | -0.72916000 |
| H  | 0.27411700  | -1.11420100 | -1.53108000 |
| Cl | -3.97555500 | -0.14983700 | 0.49783000  |
| H  | -0.59784200 | 0.39069500  | 1.80109600  |
| C  | 0.37235700  | 0.62595400  | 1.39022000  |
| C  | 1.08152800  | 1.65755400  | 1.84361700  |
| C  | 0.87401200  | -0.28721200 | 0.32293600  |
| C  | 2.39613700  | 1.92381400  | 1.32280700  |
| C  | 2.27092600  | 0.03923400  | -0.21021900 |
| Cl | 0.99159700  | -1.90226900 | 1.09731700  |
| C  | 2.95784200  | 1.15382300  | 0.37182700  |
| H  | 3.95039600  | 1.35646600  | 0.00327200  |
| H  | 0.82759000  | 1.24699700  | -2.08689800 |
| H  | 2.95014300  | 2.76051800  | 1.72121300  |
| S  | 2.93467600  | -0.83899200 | -1.41088400 |
| O  | -1.75276900 | -1.93114800 | -0.22552700 |
| H  | -1.04178300 | 2.80482500  | -1.98469900 |
| H  | 0.68545500  | 2.28996000  | 2.62216200  |

IM34

|    |             |             |             |
|----|-------------|-------------|-------------|
| C  | 1.96363500  | 1.97066200  | 1.21606700  |
| C  | 2.89868900  | 1.13652300  | 0.49879600  |
| C  | 2.51579100  | 0.01058800  | -0.11962300 |
| C  | 1.10948900  | -0.41675000 | -0.13790100 |
| C  | 0.15882100  | 0.35401400  | 0.76861300  |
| C  | 0.67958200  | 1.62882200  | 1.32081100  |
| H  | 3.93385700  | 1.43786400  | 0.44737600  |
| H  | 0.04533200  | -0.34174900 | 1.61617600  |
| Cl | 3.61903900  | -0.94690700 | -1.01400200 |
| H  | -0.80674100 | 2.37601500  | -0.71096700 |
| C  | -1.52774300 | 1.57810200  | -0.60843900 |
| C  | -2.76288200 | 1.68284200  | -1.23028200 |
| C  | -1.19753300 | 0.46311700  | 0.13849500  |
| C  | -3.69101400 | 0.65748300  | -1.11803000 |
| C  | -2.13450900 | -0.58876400 | 0.25929300  |
| C  | -3.37603700 | -0.46653000 | -0.38934700 |
| H  | -4.07762900 | -1.28034400 | -0.29869900 |
| H  | -0.01729300 | 2.25201600  | 1.86191400  |
| H  | -4.65047700 | 0.73611800  | -1.60465500 |
| S  | -1.80569000 | -1.98835000 | 1.17893800  |
| O  | 0.72324700  | -1.34634300 | -0.79840500 |
| H  | 2.33334100  | 2.87731600  | 1.66835100  |
| H  | -2.99673500 | 2.56387400  | -1.80794500 |

## IM35

|    |             |             |             |
|----|-------------|-------------|-------------|
| C  | 1.95275500  | 1.93735300  | 1.30791600  |
| C  | 2.89186800  | 1.12372600  | 0.70194500  |
| C  | 2.48311600  | 0.11163200  | -0.14164900 |
| C  | 1.13020100  | -0.09641800 | -0.38510200 |
| C  | 0.16663100  | 0.71145400  | 0.22974800  |
| C  | 0.60737200  | 1.72648800  | 1.06570800  |
| H  | 3.94759200  | 1.26304600  | 0.87177100  |
| H  | -0.15871100 | -1.30495900 | 1.62297900  |
| Cl | 3.62279100  | -0.91201100 | -0.92874400 |
| H  | -1.38721600 | 2.38901100  | -1.07204300 |
| C  | -1.94078700 | 1.51244800  | -0.77022600 |
| C  | -3.27523800 | 1.38788900  | -1.10155400 |
| C  | -1.26832000 | 0.51584500  | -0.07023800 |
| C  | -3.96190400 | 0.24600500  | -0.72540800 |
| C  | -1.97581100 | -0.62196200 | 0.32836000  |
| C  | -3.31960600 | -0.74376800 | -0.00959900 |
| H  | -3.86593800 | -1.61923800 | 0.30718000  |
| H  | -0.13665800 | 2.35130300  | 1.53628900  |
| H  | -5.00427000 | 0.12818000  | -0.97802300 |
| S  | -1.27930800 | -1.93698500 | 1.26772000  |
| H  | -3.77150800 | 2.16992900  | -1.65402000 |
| H  | 2.27041600  | 2.72875500  | 1.96685100  |
| O  | 0.75576500  | -1.05928000 | -1.20940600 |

## IM36

|    |             |             |             |
|----|-------------|-------------|-------------|
| C  | 2.38704500  | 2.23685800  | 0.30640700  |
| C  | 3.03058100  | 1.03074600  | 0.05347500  |
| C  | 2.30548400  | -0.12627900 | -0.18276600 |
| C  | 0.93018300  | -0.04703200 | -0.15465600 |
| C  | 0.27327300  | 1.16142600  | 0.09915700  |
| C  | 1.00763800  | 2.31831200  | 0.32640700  |
| H  | 4.10732300  | 0.98001800  | 0.03898500  |
| H  | -0.51813500 | -0.58743400 | 2.24524900  |
| Cl | 3.08658800  | -1.61900200 | -0.51236600 |
| H  | -2.21174900 | 2.69717000  | -0.12476600 |
| C  | -2.24498200 | 1.62399400  | -0.23339200 |
| C  | -3.39689300 | 1.00071400  | -0.69438000 |
| C  | -1.12006800 | 0.86342300  | -0.02561700 |
| C  | -3.37707400 | -0.36659400 | -1.08088800 |
| C  | -1.20358100 | -0.61863200 | -0.04385400 |
| C  | -2.29866700 | -1.15355700 | -0.86738800 |



|      |             |             |             |
|------|-------------|-------------|-------------|
| H    | -2.25335700 | -2.18575200 | -1.17490500 |
| H    | 2.98112200  | 3.11806600  | 0.48859700  |
| H    | -4.23721100 | -0.77194300 | -1.59121100 |
| S    | -1.56603800 | -1.22047800 | 1.70372700  |
| H    | 0.51151700  | 3.25631900  | 0.51939800  |
| H    | -4.28821900 | 1.58194800  | -0.86744100 |
| O    | 0.09196200  | -1.07224700 | -0.38729200 |
| IM37 |             |             |             |
| C    | -0.60634500 | -2.10160100 | 1.42481000  |
| C    | -1.73803300 | -1.93463800 | 0.55028200  |
| C    | -2.10291600 | -0.72256900 | 0.09088900  |
| C    | -1.38469900 | 0.47558400  | 0.48297700  |
| C    | 0.00202600  | 0.24800400  | 1.02502200  |
| C    | 0.20560300  | -1.07576200 | 1.68057700  |
| H    | -2.33631900 | -2.79469600 | 0.29287700  |
| H    | 0.25172000  | 1.05092100  | 1.71534200  |
| Cl   | -3.50662000 | -0.57763500 | -0.88896000 |
| H    | -0.12746100 | -0.49248400 | -1.72191000 |
| C    | 0.84253200  | -0.55143200 | -1.25275400 |
| C    | 1.79117200  | -1.35439600 | -1.72834700 |
| C    | 1.08497900  | 0.35788000  | -0.09968800 |
| C    | 3.11551900  | -1.38351000 | -1.14435200 |
| C    | 2.45748300  | 0.19923700  | 0.57495300  |
| Cl   | 1.13087300  | 2.01607000  | -0.78697800 |
| C    | 3.44743100  | -0.63646500 | -0.08395100 |
| H    | 4.43042400  | -0.65528900 | 0.35820500  |
| H    | 1.05656000  | -1.17849800 | 2.33559500  |
| H    | 3.85517300  | -2.02992700 | -1.59347600 |
| H    | -0.43945500 | -3.06867500 | 1.87231500  |
| H    | 1.59016400  | -1.98079900 | -2.58307000 |
| O    | 2.66627500  | 0.75383600  | 1.62722300  |
| S    | -1.99448900 | 1.97146100  | 0.35467300  |
| IM38 |             |             |             |
| C    | 1.04335600  | 2.40469400  | -0.71129200 |
| C    | 2.13306800  | 1.48817500  | -0.89649400 |
| C    | 2.18682300  | 0.29084300  | -0.27501400 |
| C    | 1.15110300  | -0.14586400 | 0.62857600  |
| C    | -0.08865400 | 0.71468300  | 0.68347600  |
| C    | 0.00011500  | 2.05917500  | 0.04435700  |
| H    | 2.95164800  | 1.77333300  | -1.53922700 |
| H    | -0.35275300 | 0.85846200  | 1.73219700  |

|    |             |             |             |
|----|-------------|-------------|-------------|
| Cl | 3.55418700  | -0.71885700 | -0.53374000 |
| H  | -0.22037400 | -1.26364900 | -1.26547700 |
| C  | -1.18744800 | -0.92727200 | -0.92421300 |
| C  | -2.33800200 | -1.49362400 | -1.47469500 |
| C  | -1.27957600 | 0.02668300  | 0.05542100  |
| C  | -3.61327800 | -1.10794900 | -1.04485600 |
| C  | -2.58547500 | 0.46055200  | 0.50931300  |
| C  | -3.74371100 | -0.15586100 | -0.07657800 |
| H  | -4.70480200 | 0.17101100  | 0.28768200  |
| H  | -0.83693100 | 2.72062500  | 0.20695400  |
| H  | -4.48621100 | -1.56745900 | -1.48151800 |
| H  | 1.09201600  | 3.36947800  | -1.19047500 |
| H  | -2.23853500 | -2.24690100 | -2.24074500 |
| S  | 1.24063200  | -1.50078800 | 1.52552500  |
| O  | -2.69315900 | 1.34160700  | 1.38097200  |

IM39

|    |             |             |             |
|----|-------------|-------------|-------------|
| C  | 1.76931100  | 2.45802800  | 0.25570900  |
| C  | 2.73686600  | 1.47453700  | 0.15415200  |
| C  | 2.35763600  | 0.16239800  | -0.04450600 |
| C  | 1.01576900  | -0.19156800 | -0.15384500 |
| C  | 0.04112700  | 0.80784400  | -0.04126500 |
| C  | 0.42996700  | 2.12228000  | 0.16328800  |
| H  | 3.78526500  | 1.71547200  | 0.22505500  |
| H  | -0.45487800 | -0.25148900 | 2.01957900  |
| Cl | 3.56029900  | -1.06517700 | -0.18839200 |
| H  | -1.63860500 | 1.21060100  | -2.10169700 |
| C  | -2.12888800 | 0.71108100  | -1.27967800 |
| C  | -3.45946400 | 0.35746000  | -1.37177600 |
| C  | -1.38459200 | 0.42328900  | -0.14071400 |
| C  | -4.06364300 | -0.29497900 | -0.30608900 |
| C  | -2.01228100 | -0.22244100 | 0.92916600  |
| C  | -3.34942300 | -0.58293600 | 0.83740300  |
| H  | -3.80625900 | -1.07888600 | 1.67881200  |
| H  | -0.33251700 | 2.88088300  | 0.25188600  |
| H  | -5.10295900 | -0.57929100 | -0.36644300 |
| H  | -4.02010900 | 0.58150400  | -2.26500000 |
| H  | 2.06362700  | 3.48354000  | 0.41136200  |
| O  | -1.38025100 | -0.49010800 | 2.08392900  |
| S  | 0.51931600  | -1.83021400 | -0.45833700 |

IM40

|   |            |            |            |
|---|------------|------------|------------|
| C | 2.12042400 | 2.41063700 | 0.16372600 |
|---|------------|------------|------------|

|       |             |             |             |
|-------|-------------|-------------|-------------|
| C     | 2.90796600  | 1.27979700  | 0.00780600  |
| C     | 2.31413600  | 0.03279600  | -0.10069500 |
| C     | 0.93982400  | -0.08850200 | -0.04779400 |
| C     | 0.14512400  | 1.05830000  | 0.10366800  |
| C     | 0.74306400  | 2.30773800  | 0.20792400  |
| H     | 3.98256600  | 1.35587700  | -0.02968200 |
| H     | -0.80859000 | -0.59957800 | 2.20008400  |
| Cl    | 3.28815300  | -1.37204700 | -0.31440800 |
| H     | -2.13626100 | 2.59743800  | -0.46379300 |
| C     | -2.29939800 | 1.53984800  | -0.31628100 |
| C     | -3.54136500 | 0.98588800  | -0.61087300 |
| C     | -1.25501500 | 0.73326300  | 0.05219100  |
| C     | -3.72191300 | -0.42103800 | -0.60600100 |
| C     | -1.49275800 | -0.71118900 | 0.38320500  |
| C     | -2.74373600 | -1.25594400 | -0.20094600 |
| H     | -2.88425900 | -2.32497200 | -0.17458100 |
| H     | 0.13220900  | 3.18879300  | 0.33085300  |
| H     | -4.66243700 | -0.82716100 | -0.94542400 |
| H     | -4.35346400 | 1.62452900  | -0.91922500 |
| H     | 2.59350700  | 3.37560800  | 0.25258400  |
| O     | -1.61687500 | -0.89220300 | 1.77505000  |
| S     | 0.02968800  | -1.57235400 | -0.20761600 |
| CPR1  |             |             |             |
| C     | 0.31581100  | -1.44385300 | -0.00022000 |
| C     | -0.46099100 | -0.31302000 | -0.00006600 |
| C     | 0.13573600  | 1.00832200  | 0.00005100  |
| C     | 1.57368600  | 1.05986000  | 0.00031800  |
| C     | 2.32680200  | -0.07616800 | 0.00019600  |
| C     | 1.70247200  | -1.33072000 | -0.00011300 |
| H     | -0.15374000 | -2.41425700 | -0.00041200 |
| H     | 2.01521000  | 2.04373500  | 0.00056400  |
| H     | 3.40381400  | -0.01685000 | 0.00035400  |
| H     | 2.30158700  | -2.22777500 | -0.00028700 |
| O     | -0.55072600 | 2.03815600  | 0.00001500  |
| Cl    | -2.16012700 | -0.41862500 | -0.00007800 |
| CTPR1 |             |             |             |
| C     | -2.35878900 | -0.70642400 | -0.00000100 |
| C     | -2.36847400 | 0.67862900  | -0.00000100 |
| C     | -1.18392900 | 1.38882000  | 0.00000300  |
| C     | 0.03673700  | 0.71954300  | 0.00000000  |
| C     | 0.02777900  | -0.66939800 | -0.00000300 |

|    |             |             |             |
|----|-------------|-------------|-------------|
| C  | -1.15408800 | -1.38314100 | 0.00000000  |
| H  | -3.28420500 | -1.25985100 | 0.00000000  |
| H  | -3.30517300 | 1.21371600  | 0.00000000  |
| H  | -1.19990300 | 2.46761600  | 0.00001100  |
| H  | -1.12004600 | -2.46083900 | 0.00000100  |
| Cl | 1.53972200  | -1.50435400 | 0.00000100  |
| S  | 1.54616500  | 1.59032500  | -0.00000100 |

4-MCDF

|    |             |             |             |
|----|-------------|-------------|-------------|
| C  | 2.02352900  | 2.25082800  | 0.00021200  |
| C  | 2.75050300  | 1.06341900  | 0.00029900  |
| C  | 2.10580400  | -0.15809900 | 0.00004000  |
| C  | 0.72608800  | -0.15483600 | -0.00027000 |
| C  | -0.01294400 | 1.02591700  | -0.00039600 |
| C  | 0.64226700  | 2.24832000  | -0.00017600 |
| H  | 3.82830000  | 1.08287700  | 0.00055100  |
| Cl | 2.97667000  | -1.63814900 | 0.00006600  |
| H  | -2.69512900 | 2.30804000  | -0.00027100 |
| C  | -2.62539800 | 1.23131700  | -0.00005100 |
| C  | -3.76480800 | 0.45066900  | 0.00033100  |
| C  | -1.39025800 | 0.59708000  | -0.00023900 |
| C  | -3.68265200 | -0.94129400 | 0.00029500  |
| C  | -1.34048400 | -0.79328800 | -0.00010100 |
| C  | -2.46256200 | -1.59209100 | -0.00006200 |
| H  | -2.38416600 | -2.66669900 | -0.00005700 |
| H  | 0.08935300  | 3.17426900  | -0.00038800 |
| H  | -4.59057600 | -1.52395600 | 0.00036000  |
| H  | 2.55892700  | 3.18693600  | 0.00050300  |
| H  | -4.73447600 | 0.92305500  | 0.00057500  |
| O  | -0.06126600 | -1.25045500 | -0.00021200 |

4-MCDT

|    |             |             |             |
|----|-------------|-------------|-------------|
| C  | 1.88927000  | 2.43016100  | 0.00009800  |
| C  | 2.74090200  | 1.33007900  | 0.00013900  |
| C  | 2.21507800  | 0.05665400  | 0.00001900  |
| C  | 0.84080600  | -0.12222300 | -0.00007700 |
| C  | -0.01623400 | 0.98322200  | -0.00010000 |
| C  | 0.52068400  | 2.26600400  | -0.00005100 |
| H  | 3.81074600  | 1.46132900  | 0.00023100  |
| Cl | 3.25257600  | -1.31956300 | 0.00001000  |
| H  | -2.46698500 | 2.43497300  | -0.00021400 |
| C  | -2.54808100 | 1.35856300  | -0.00012100 |
| C  | -3.78739600 | 0.75615400  | 0.00006100  |

|   |             |             |             |
|---|-------------|-------------|-------------|
| C | -1.40052200 | 0.57156400  | -0.00012400 |
| C | -3.89908700 | -0.63245900 | 0.00016200  |
| C | -1.52912000 | -0.81971600 | -0.00007000 |
| C | -2.77441500 | -1.43102400 | 0.00008200  |
| H | -2.86170500 | -2.50626400 | 0.00010600  |
| H | -0.13084000 | 3.12617300  | -0.00018000 |
| H | -4.87550400 | -1.09137800 | 0.00036000  |
| H | 2.31255800  | 3.42211900  | 0.00022100  |
| H | -4.67907800 | 1.36312400  | 0.00011800  |
| S | 0.00535600  | -1.64121100 | -0.00005800 |

4-MCPT

|    |             |             |            |
|----|-------------|-------------|------------|
| C  | 0.00000000  | 0.99549700  | 0.00000000 |
| C  | -0.15071900 | 2.37817700  | 0.00000000 |
| C  | 0.92947400  | 3.23936000  | 0.00000000 |
| C  | 2.20522100  | 2.71023400  | 0.00000000 |
| C  | 2.38668900  | 1.34208800  | 0.00000000 |
| C  | 1.29594400  | 0.49398900  | 0.00000000 |
| H  | 0.75993000  | 4.30303000  | 0.00000000 |
| C  | -0.68984100 | -1.60748900 | 0.00000000 |
| C  | -1.53254400 | -2.71065300 | 0.00000000 |
| C  | -1.02455400 | -3.99567700 | 0.00000000 |
| C  | 0.34590400  | -4.19028800 | 0.00000000 |
| C  | 1.19261800  | -3.09976600 | 0.00000000 |
| C  | 0.67828300  | -1.81615200 | 0.00000000 |
| H  | -2.60067600 | -2.55163700 | 0.00000000 |
| H  | 2.26472300  | -3.21556900 | 0.00000000 |
| H  | 3.36966500  | 0.89998800  | 0.00000000 |
| H  | 0.75746500  | -5.18703200 | 0.00000000 |
| S  | -1.43233800 | -0.01479300 | 0.00000000 |
| O  | 1.60738200  | -0.82488300 | 0.00000000 |
| H  | -1.69888300 | -4.83703000 | 0.00000000 |
| H  | 3.06061900  | 3.36646000  | 0.00000000 |
| Cl | -1.74549100 | 3.03656700  | 0.00000000 |

1-MCPT

|   |             |            |            |
|---|-------------|------------|------------|
| C | 1.35670000  | 0.66549100 | 0.00000000 |
| C | 2.28132200  | 1.69840100 | 0.00000000 |
| C | 1.86948800  | 3.01584400 | 0.00000000 |
| C | 0.52086100  | 3.31486100 | 0.00000000 |
| C | -0.40265200 | 2.28770200 | 0.00000000 |
| C | 0.00000000  | 0.95693500 | 0.00000000 |
| H | 2.59841400  | 3.80998000 | 0.00000000 |

|    |             |             |            |
|----|-------------|-------------|------------|
| C  | 0.48846300  | -1.89277200 | 0.00000000 |
| C  | 0.57942500  | -3.27739700 | 0.00000000 |
| C  | -0.55565100 | -4.06425800 | 0.00000000 |
| C  | -1.80366700 | -3.46464900 | 0.00000000 |
| C  | -1.90433300 | -2.08743300 | 0.00000000 |
| C  | -0.76476700 | -1.30421700 | 0.00000000 |
| H  | 1.55678600  | -3.73646300 | 0.00000000 |
| H  | -2.86014100 | -1.58828100 | 0.00000000 |
| H  | -2.69916000 | -4.06543800 | 0.00000000 |
| S  | 1.98127700  | -0.97326500 | 0.00000000 |
| O  | -0.98858000 | 0.03822800  | 0.00000000 |
| H  | -0.46246900 | -5.13846900 | 0.00000000 |
| H  | 0.17138200  | 4.33401700  | 0.00000000 |
| H  | 3.33366900  | 1.45836700  | 0.00000000 |
| Cl | -2.08361200 | 2.65303800  | 0.00000000 |

4,6-DCDF

|    |             |             |             |
|----|-------------|-------------|-------------|
| C  | 3.02554300  | 1.88244600  | 0.00035400  |
| C  | 3.36981700  | 0.53320400  | 0.00036400  |
| C  | 2.39520000  | -0.44621000 | 0.00002500  |
| C  | 1.07818600  | -0.03577500 | -0.00028800 |
| C  | 0.72079000  | 1.30934000  | -0.00036600 |
| C  | 1.70536500  | 2.28651900  | -0.00000800 |
| H  | 4.40570000  | 0.23492900  | 0.00059900  |
| Cl | 2.79247700  | -2.11526400 | -0.00005000 |
| H  | -4.40573700 | 0.23485900  | 0.00039900  |
| C  | -3.36985500 | 0.53313600  | 0.00021300  |
| C  | -3.02563000 | 1.88238200  | 0.00013900  |
| C  | -2.39519800 | -0.44627100 | 0.00007600  |
| C  | -1.70544200 | 2.28648600  | -0.00013400 |
| C  | -1.07819400 | -0.03577700 | -0.00014800 |
| Cl | -2.79238100 | -2.11532000 | 0.00013800  |
| C  | -0.72083000 | 1.30934100  | -0.00033800 |
| H  | 1.44794100  | 3.33377900  | -0.00017300 |
| H  | -1.44811700 | 3.33377000  | -0.00024800 |
| H  | 3.81276900  | 2.61937500  | 0.00067900  |
| H  | -3.81286100 | 2.61931200  | 0.00029900  |
| O  | 0.00002000  | -0.85112800 | -0.00030000 |

4,6-DCDT

|   |            |             |            |
|---|------------|-------------|------------|
| C | 2.95289000 | 2.07628400  | 0.00081800 |
| C | 3.46066300 | 0.78088400  | 0.00062600 |
| C | 2.60007200 | -0.29500000 | 0.00008700 |

|    |             |             |             |
|----|-------------|-------------|-------------|
| C  | 1.22992300  | -0.08172400 | -0.00036800 |
| C  | 0.72141700  | 1.22066800  | -0.00061400 |
| C  | 1.59387300  | 2.30254000  | 0.00031500  |
| H  | 4.52425600  | 0.60604800  | 0.00068600  |
| Cl | 3.21267200  | -1.90521000 | -0.00019600 |
| H  | -4.52433500 | 0.60562800  | 0.00066900  |
| C  | -3.46077900 | 0.78058200  | 0.00026200  |
| C  | -2.95327100 | 2.07603600  | -0.00027700 |
| C  | -2.59992700 | -0.29522000 | 0.00028500  |
| C  | -1.59436700 | 2.30245700  | -0.00041500 |
| C  | -1.22996200 | -0.08169500 | -0.00076900 |
| Cl | -3.21225200 | -1.90549100 | 0.00058900  |
| C  | -0.72171000 | 1.22064000  | -0.00051500 |
| H  | 1.20999000  | 3.31076500  | 0.00061600  |
| H  | -1.21062900 | 3.31072400  | -0.00025100 |
| H  | 3.63863200  | 2.90857800  | 0.00150300  |
| H  | -3.63917400 | 2.90822000  | -0.00078500 |
| S  | 0.00007400  | -1.30667300 | -0.00035900 |

1,9-DCPT

|    |             |             |            |
|----|-------------|-------------|------------|
| C  | 1.33950100  | -0.04268800 | 0.00000000 |
| C  | 2.63279600  | 0.46802900  | 0.00000000 |
| C  | 3.74743800  | -0.34757700 | 0.00000000 |
| C  | 3.57292300  | -1.71699500 | 0.00000000 |
| C  | 2.30048700  | -2.25395600 | 0.00000000 |
| C  | 1.19639200  | -1.42343000 | 0.00000000 |
| H  | 4.72902800  | 0.09569700  | 0.00000000 |
| C  | -1.33941100 | -0.04282200 | 0.00000000 |
| C  | -2.63271600 | 0.46784300  | 0.00000000 |
| C  | -3.74735600 | -0.34774600 | 0.00000000 |
| C  | -3.57288500 | -1.71718000 | 0.00000000 |
| C  | -2.30046700 | -2.25414300 | 0.00000000 |
| C  | -1.19645300 | -1.42358600 | 0.00000000 |
| H  | -4.43112100 | -2.36965100 | 0.00000000 |
| S  | 0.00000000  | 1.08868400  | 0.00000000 |
| O  | -0.00045300 | -2.06309700 | 0.00000000 |
| H  | -4.72894200 | 0.09554600  | 0.00000000 |
| H  | 4.43115400  | -2.36948100 | 0.00000000 |
| H  | 2.13406000  | -3.31883700 | 0.00000000 |
| H  | -2.13403800 | -3.31902800 | 0.00000000 |
| Cl | 2.85505400  | 2.17882100  | 0.00000000 |
| Cl | -2.85493600 | 2.17865600  | 0.00000000 |

|    |             |             |            |
|----|-------------|-------------|------------|
| PT |             |             |            |
| C  | -1.34847700 | 0.63249200  | 0.00000000 |
| C  | -2.62960400 | 1.16647000  | 0.00000000 |
| C  | -3.74315400 | 0.34946900  | 0.00000000 |
| C  | -3.58057400 | -1.02498000 | 0.00000000 |
| C  | -2.30965900 | -1.56651000 | 0.00000000 |
| C  | -1.19622100 | -0.74508000 | 0.00000000 |
| H  | -4.72895000 | 0.78629100  | 0.00000000 |
| C  | 1.34880300  | 0.63134000  | 0.00000000 |
| C  | 2.63035600  | 1.16429100  | 0.00000000 |
| C  | 3.74327600  | 0.34643500  | 0.00000000 |
| C  | 3.57972100  | -1.02789900 | 0.00000000 |
| C  | 2.30840600  | -1.56846000 | 0.00000000 |
| C  | 1.19569300  | -0.74615000 | 0.00000000 |
| H  | 2.74800200  | 2.23773100  | 0.00000000 |
| H  | 2.14827600  | -2.63493200 | 0.00000000 |
| H  | -2.15034600 | -2.63310300 | 0.00000000 |
| H  | 4.43737000  | -1.68175800 | 0.00000000 |
| S  | 0.00062400  | 1.75267200  | 0.00000000 |
| O  | 0.00000000  | -1.39122700 | 0.00000000 |
| H  | 4.72939800  | 0.78253300  | 0.00000000 |
| H  | -2.74642900 | 2.24000700  | 0.00000000 |
| H  | -4.43870500 | -1.67822100 | 0.00000000 |
